# Supplementary material for: Hydrogen-protected acenes
Source: Royal Society of Chemistry journal article supplement (doi:10.1039/b700956a), 2007-01-01

Supplemental Data for:

## Hydrogen-protected acenes

by **Andreas J. Athans, Jonathan B. Briggs, Wenling Jia, and  
Glen P. Miller\***

Department of Chemistry and Materials Science Program  
University of New Hampshire  
Durham, NH 03824

[glen.miller@unh.edu](mailto:glen.miller@unh.edu)

Submitted to *Journal of Materials Chemistry*  
January 19, 2007

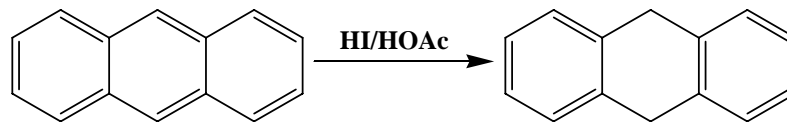

### $^1\text{H}$ NMR ( $\text{CDCl}_3$ ) of crude reaction mixture

$\text{CHCl}_3$  impurity at 7.27 ppm

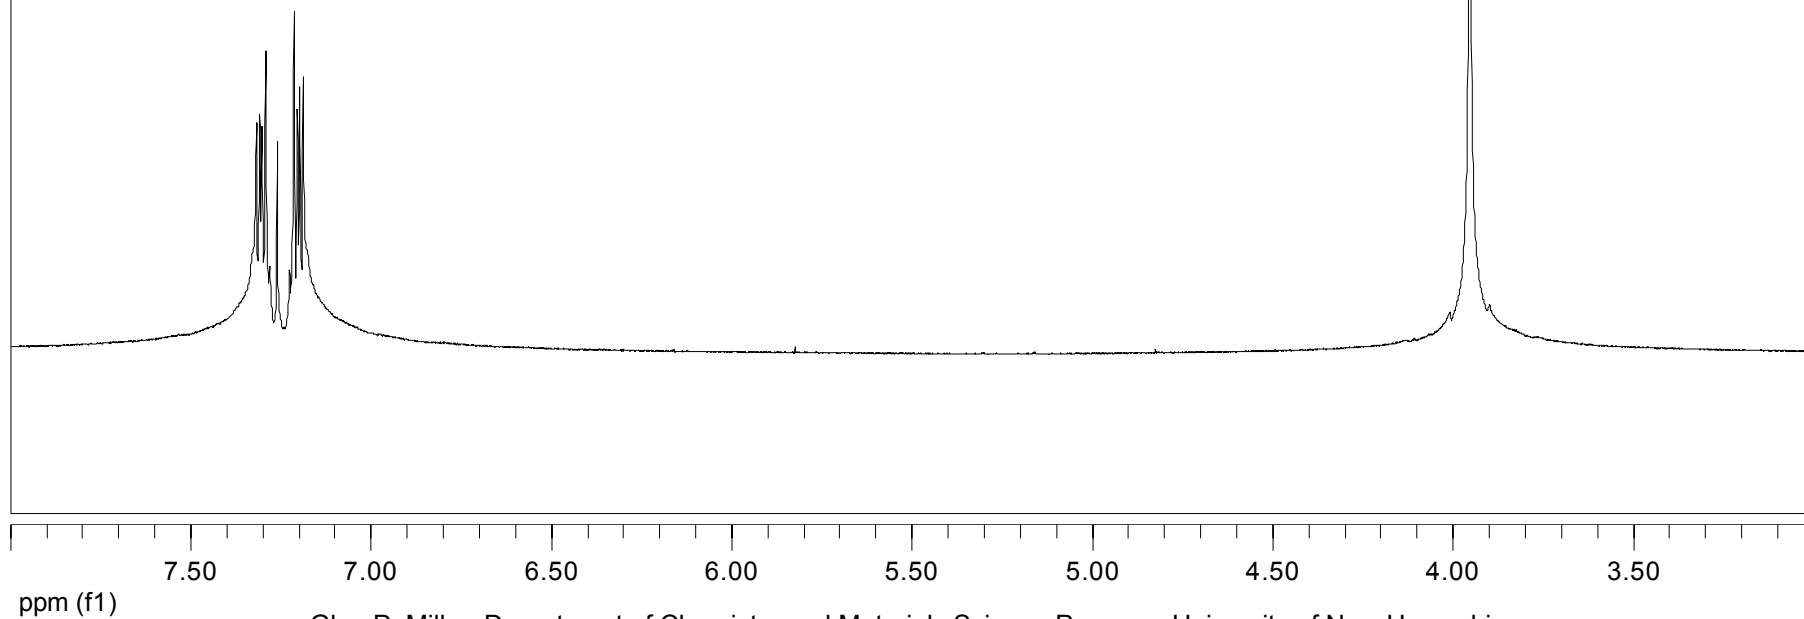

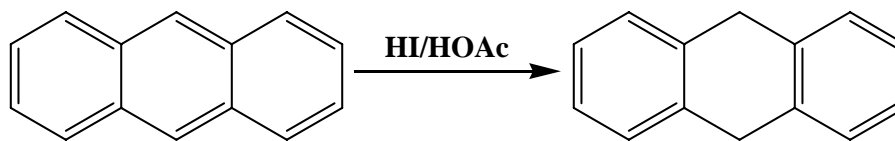

$^{13}\text{C}$  NMR ( $\text{CDCl}_3$ ) of crude reaction mixture

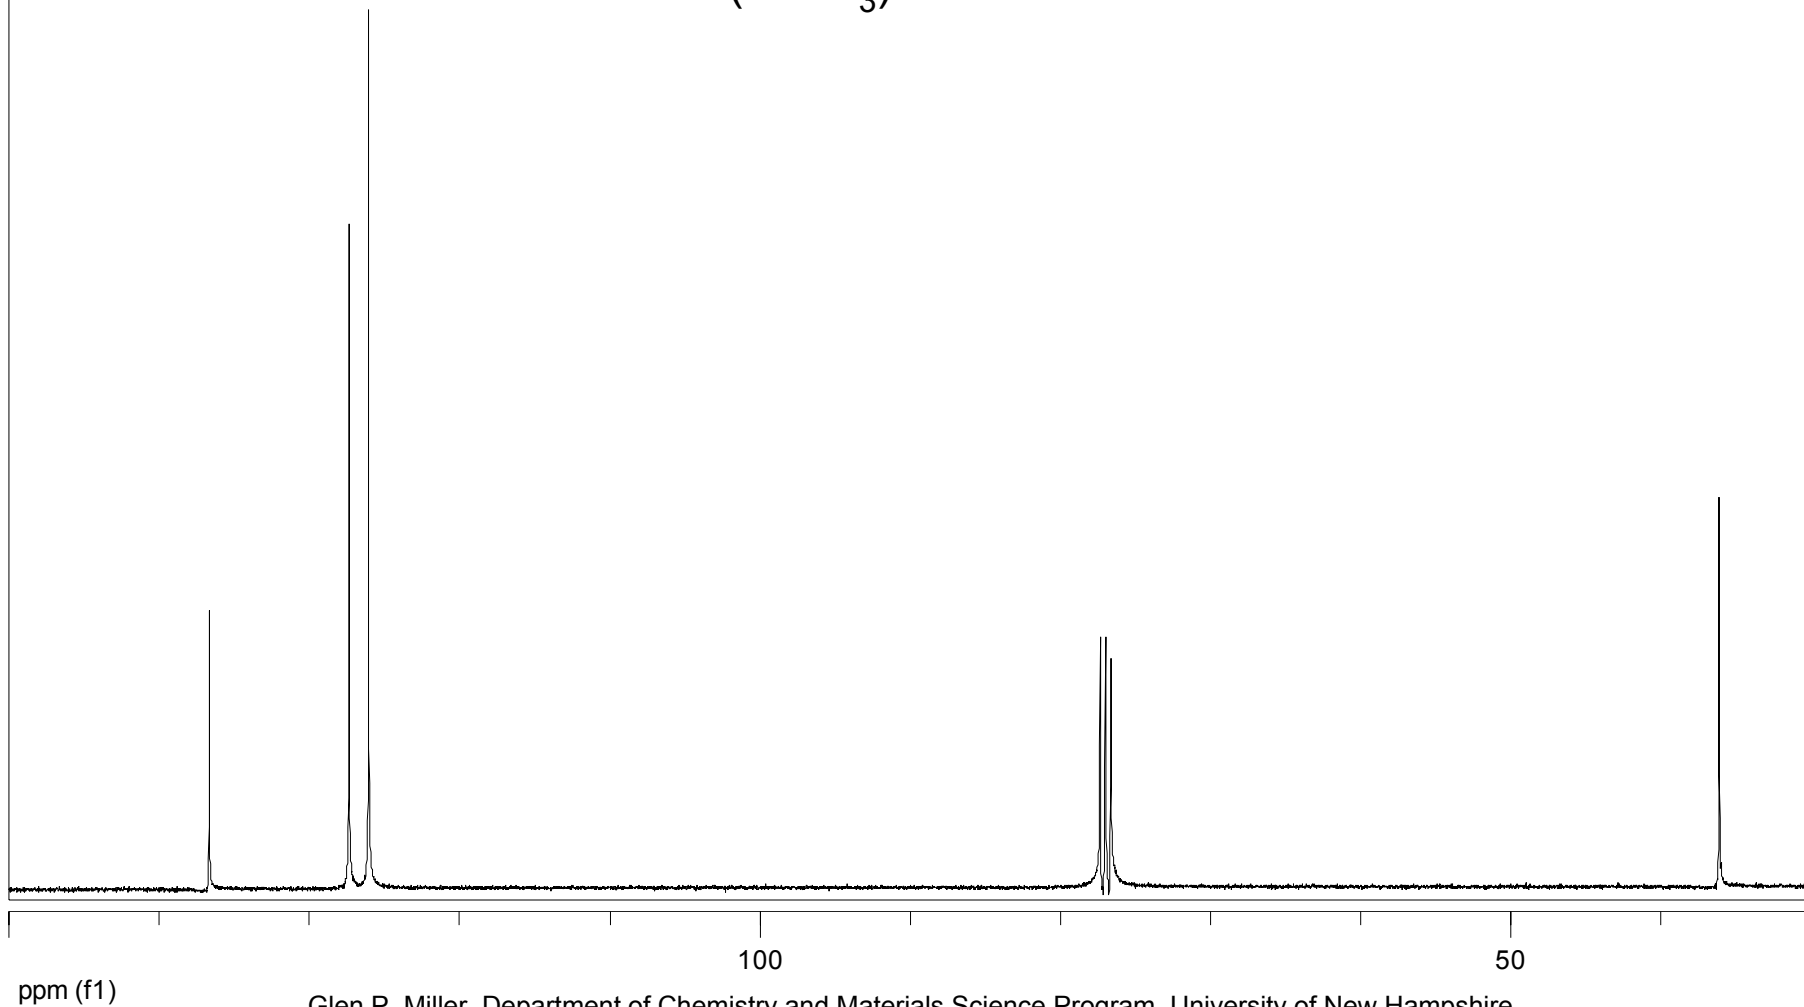

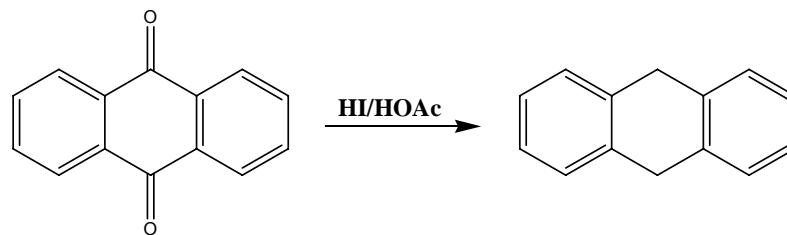

$^1\text{H}$  NMR ( $\text{CDCl}_3$ ) of crude reaction mixture

$\text{CHCl}_3$  impurity at 7.27 ppm

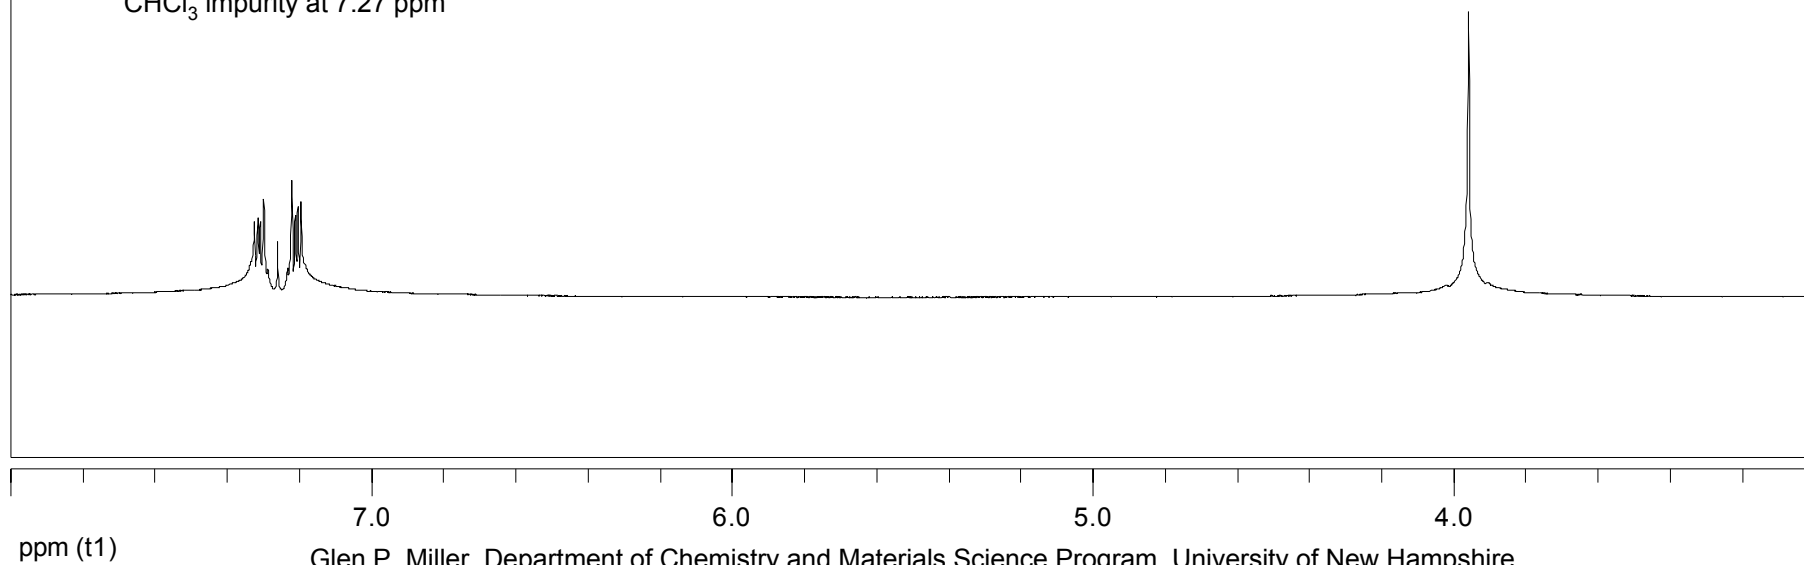

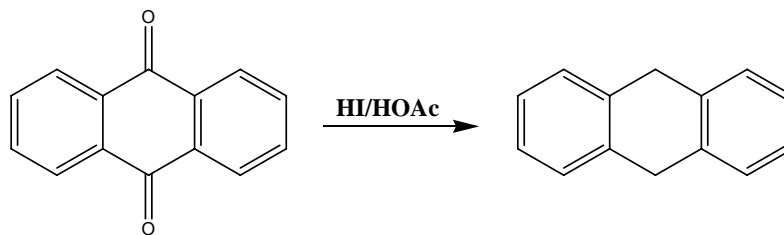

$^{13}\text{C}$  NMR ( $\text{CDCl}_3$ ) of crude reaction mixture

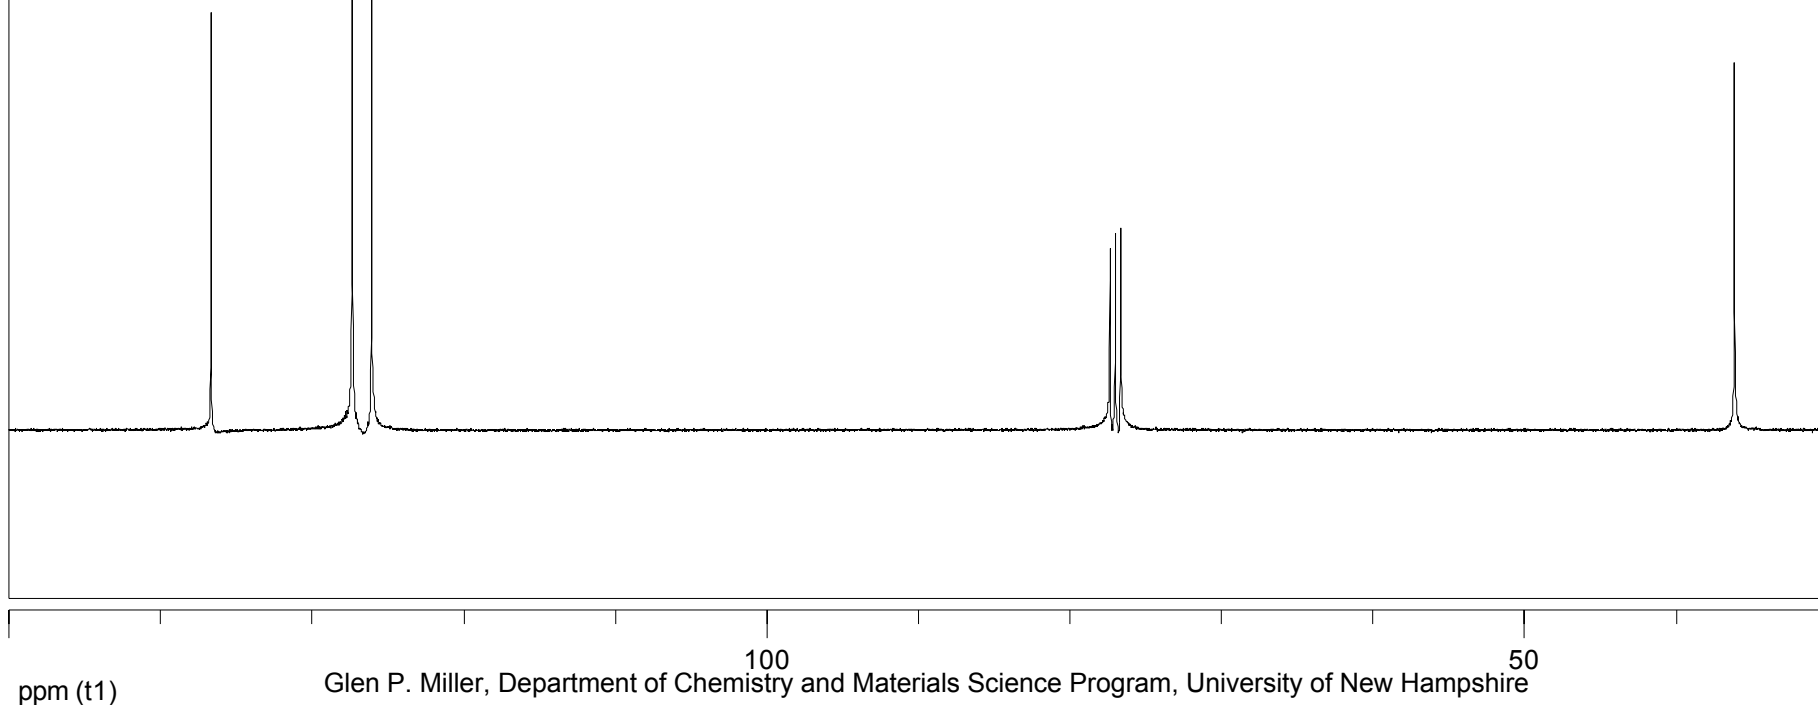

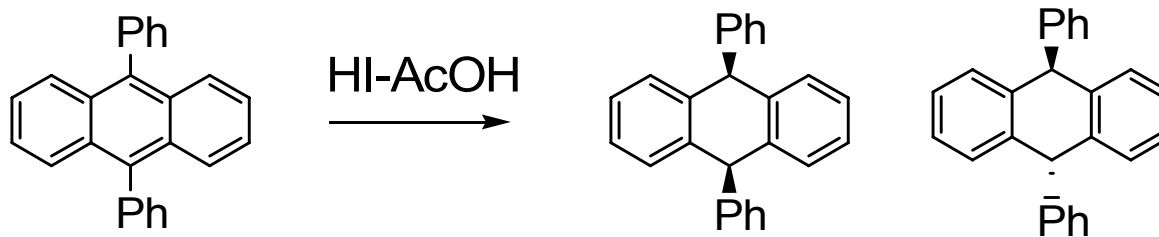

$^1\text{H}$  NMR ( $\text{CDCl}_3$ ) of crude reaction mixture

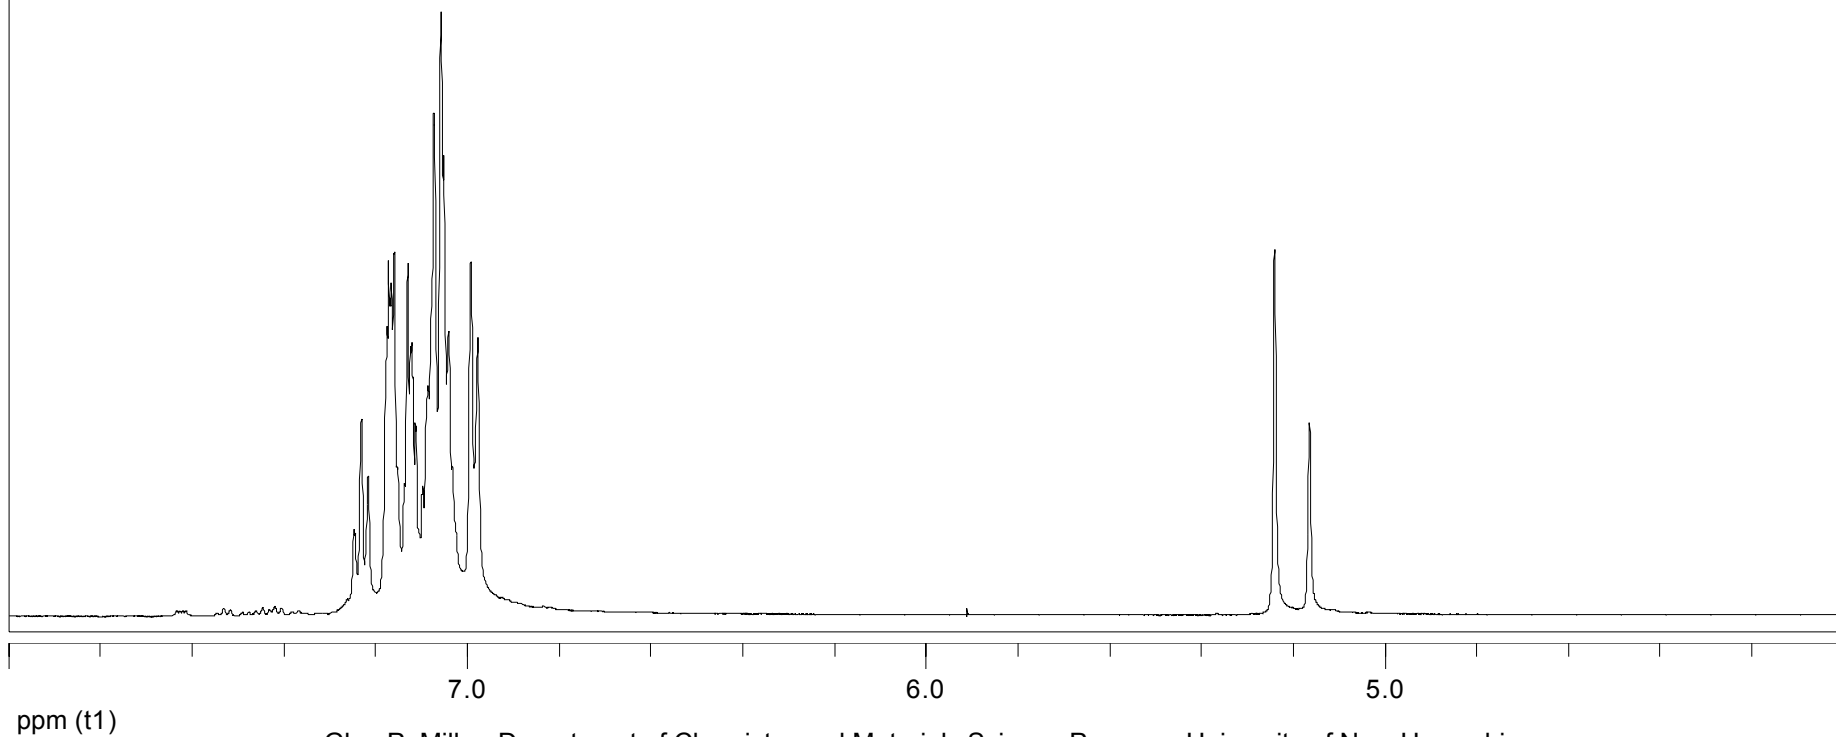

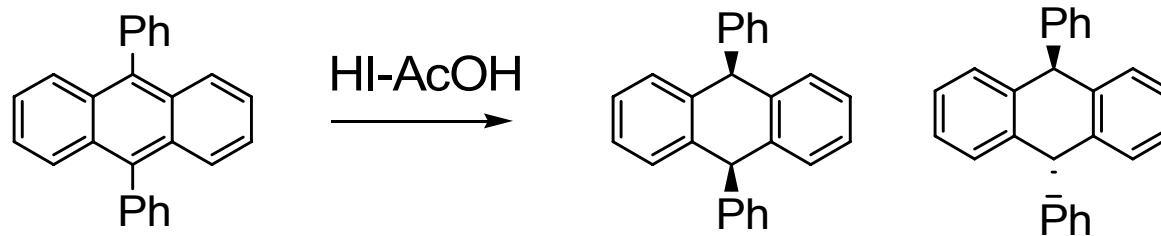

$^{13}\text{C}$  NMR ( $\text{CDCl}_3$ ) of crude reaction mixture

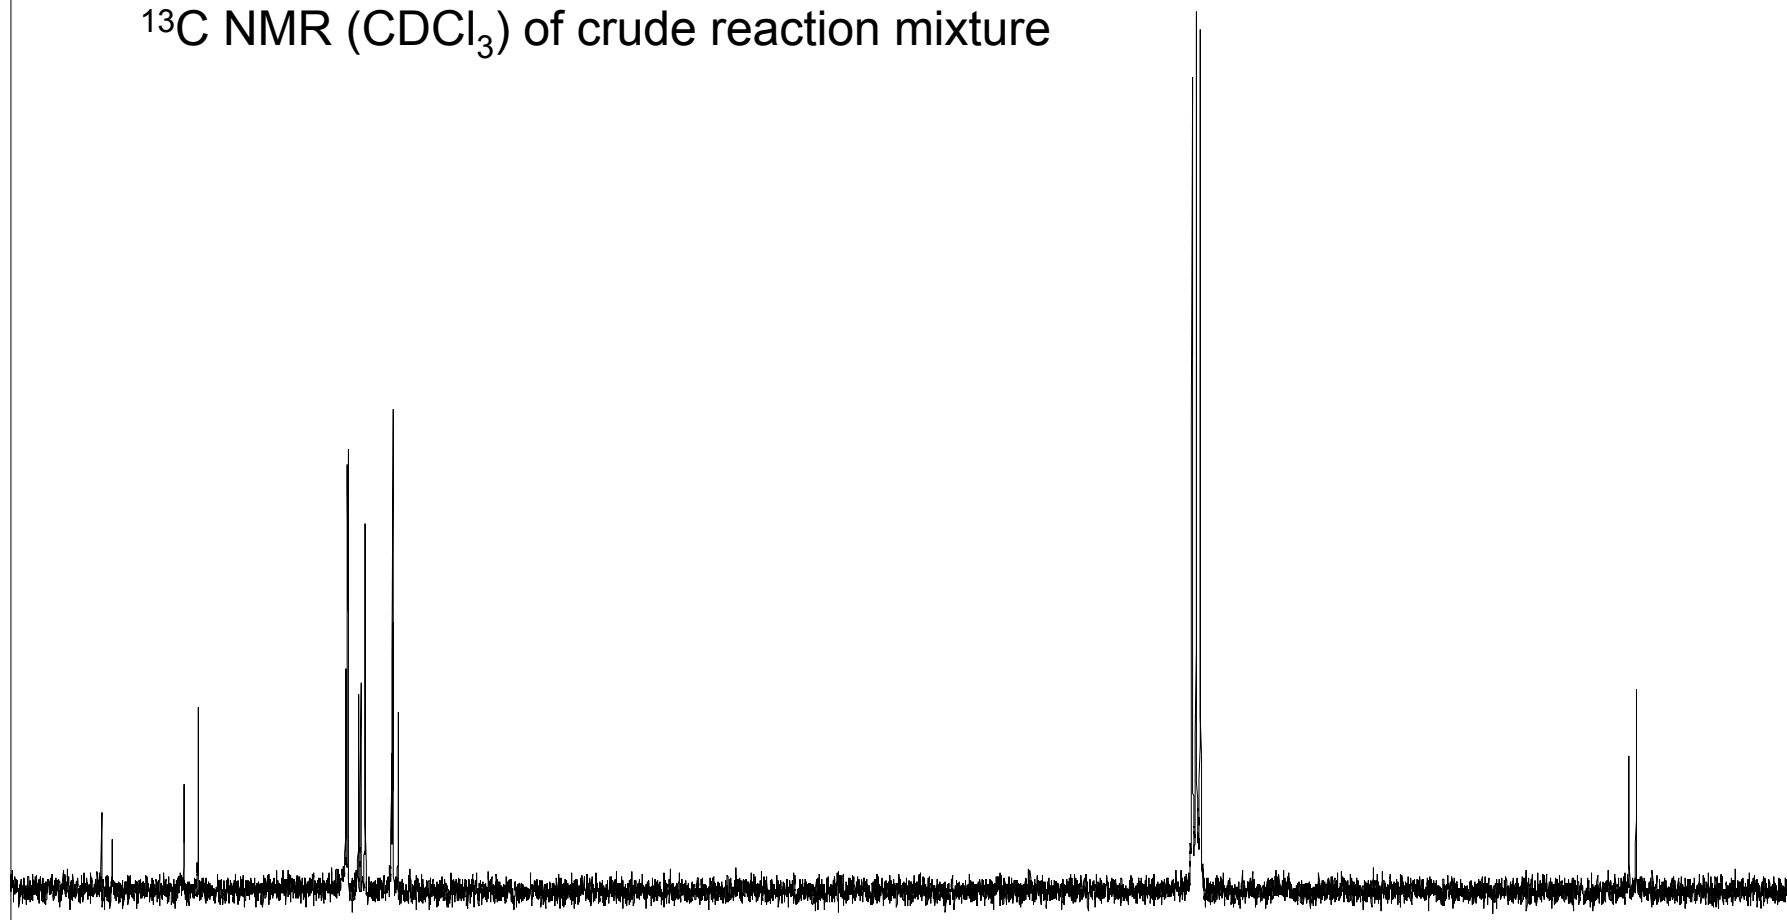

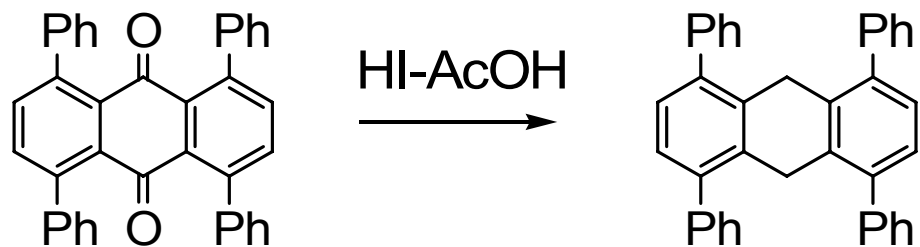

$^1\text{H}$  NMR ( $\text{CDCl}_3$ ) of crude reaction mixture

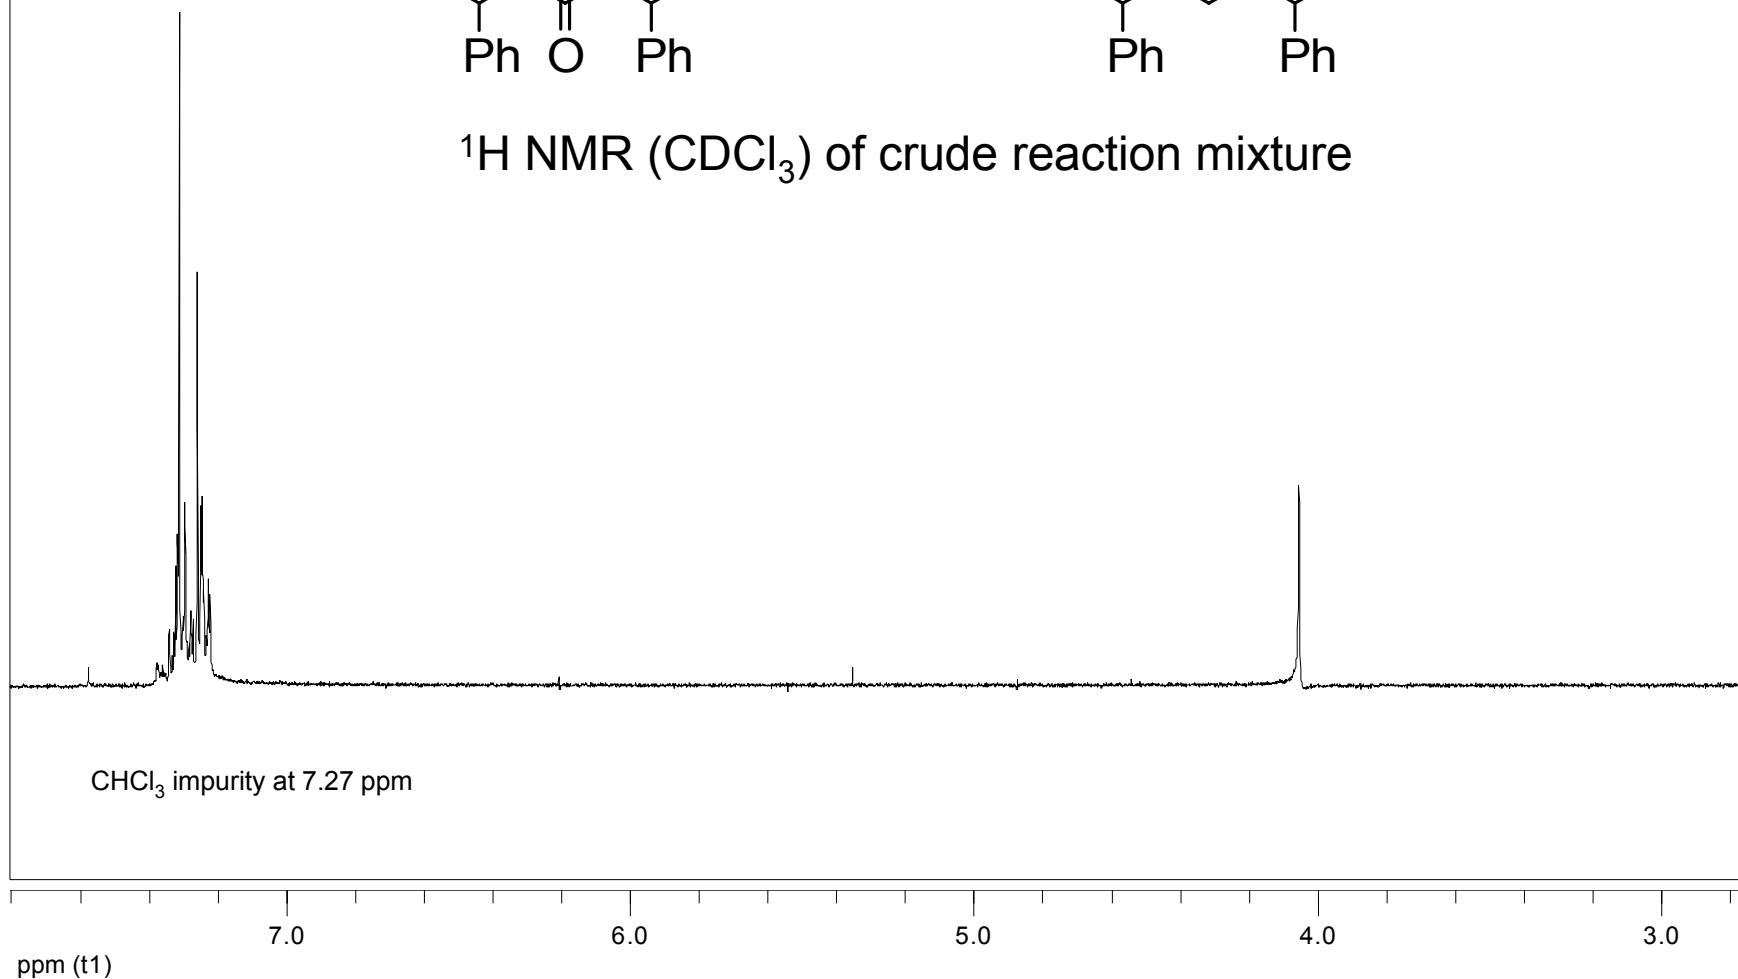



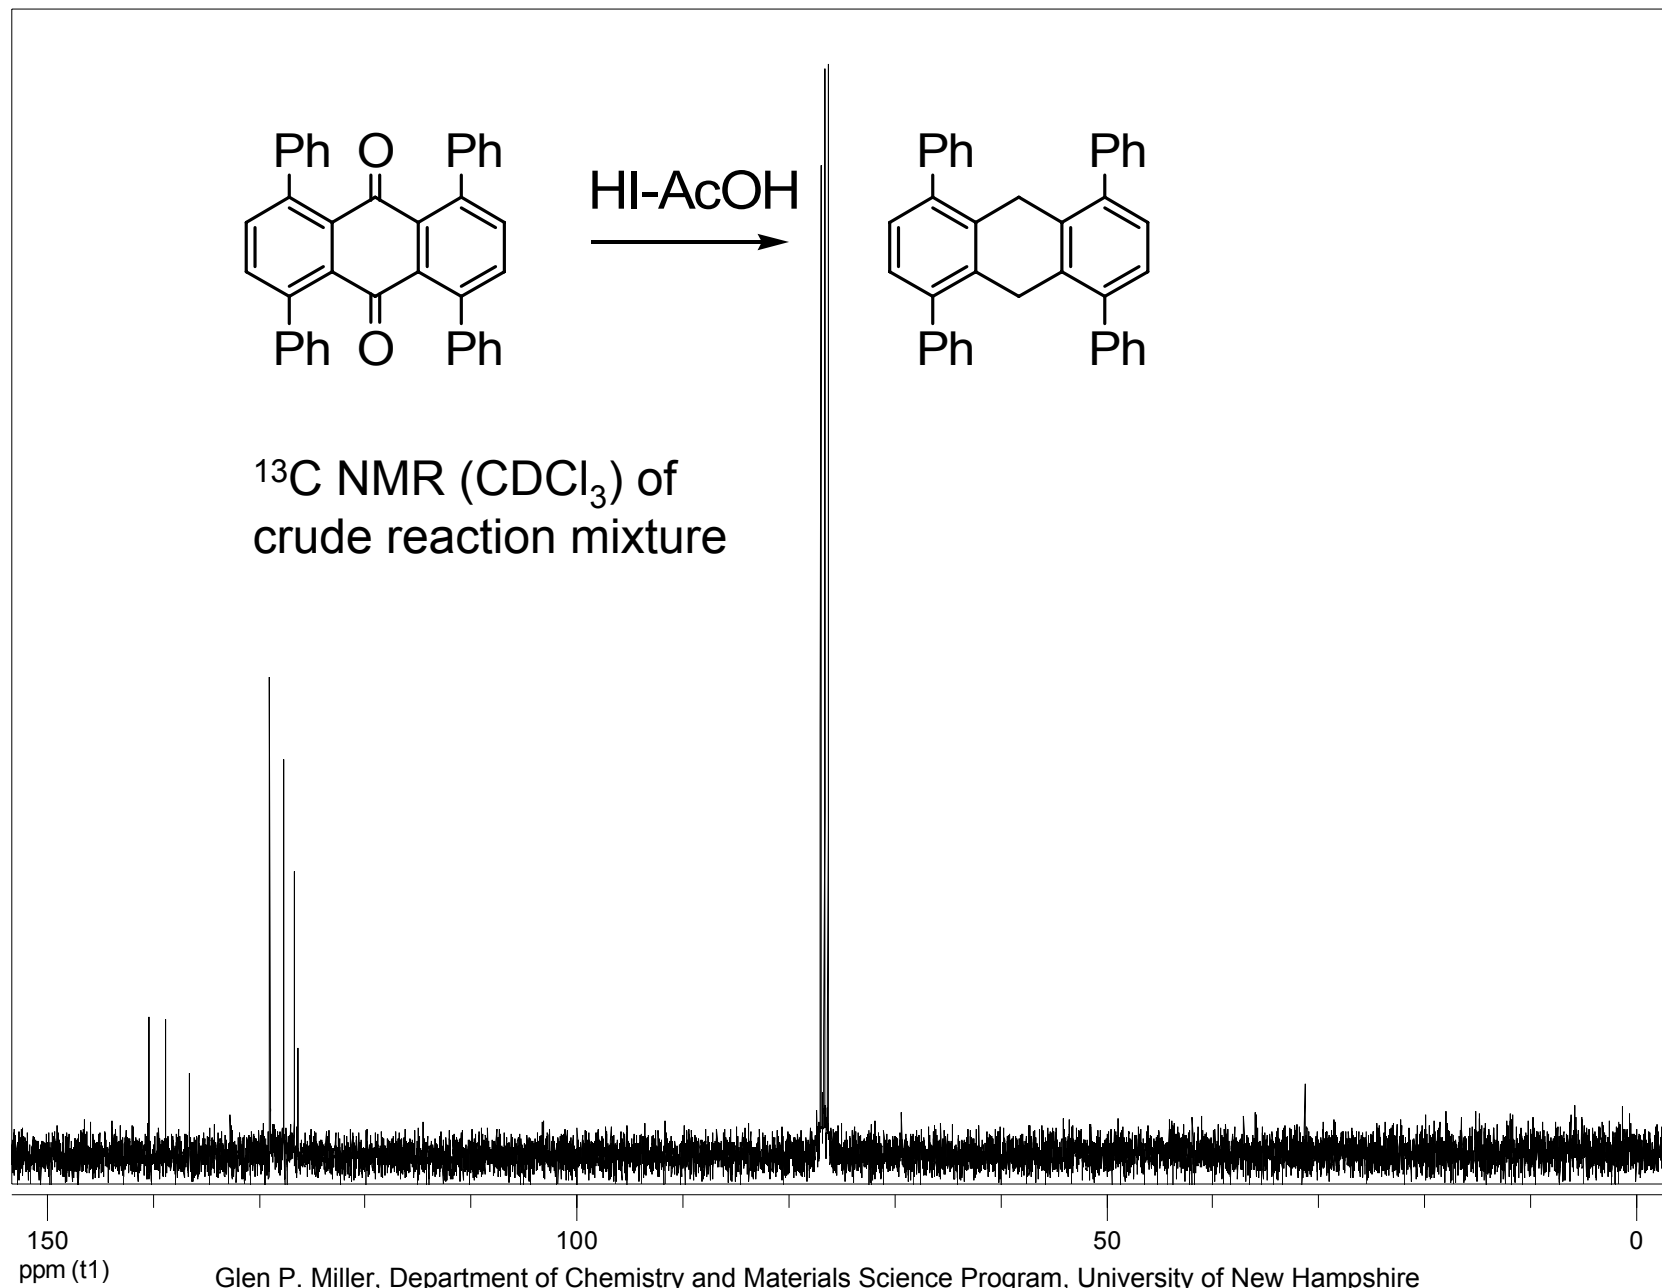

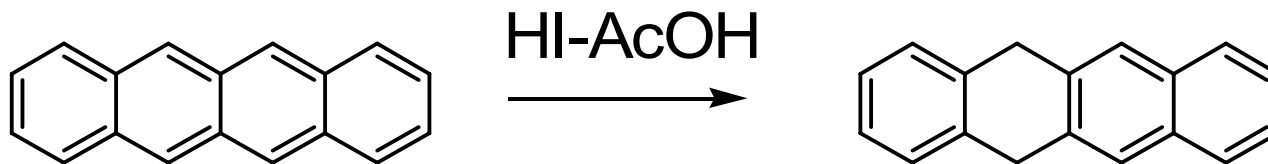

$^1\text{H}$  NMR ( $\text{CDCl}_3$ ) of crude reaction mixture

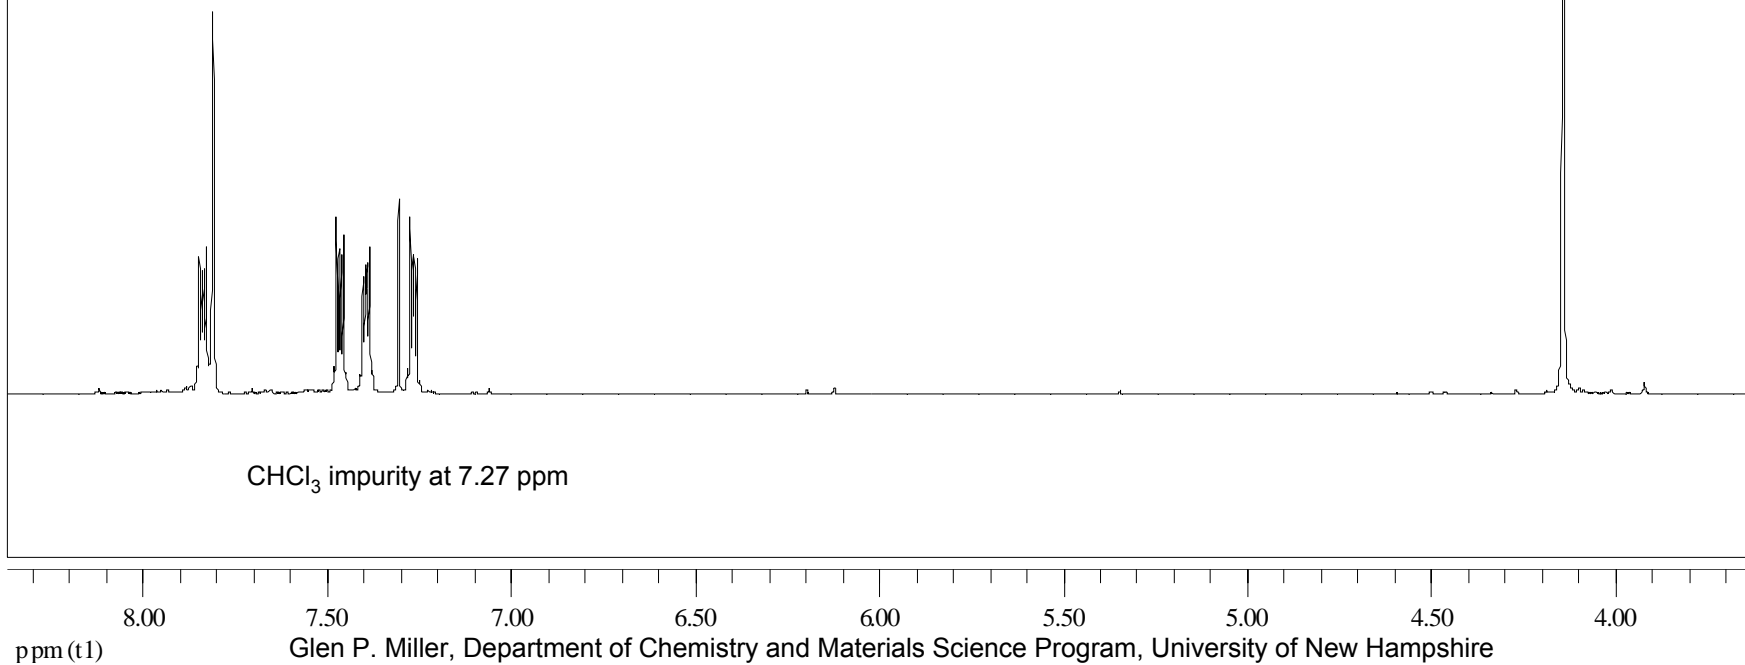

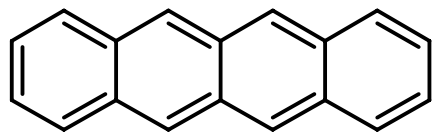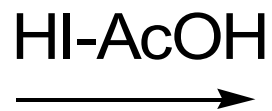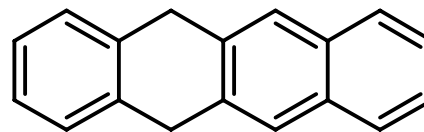

$^{13}\text{C}$  NMR ( $\text{CDCl}_3$ ) of  
crude reaction mixture

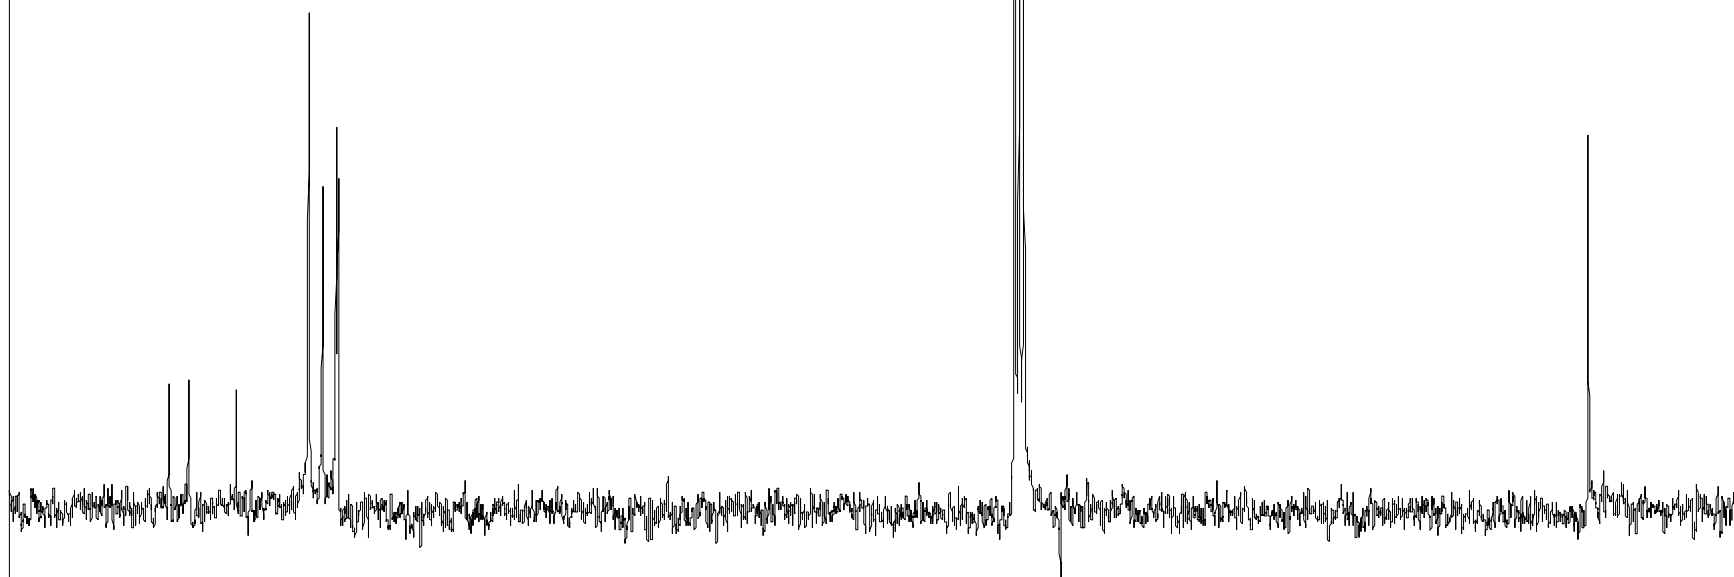

ppm (f1)

125

100

75

50

Glen P. Miller, Department of Chemistry and Materials Science Program, University of New Hampshire

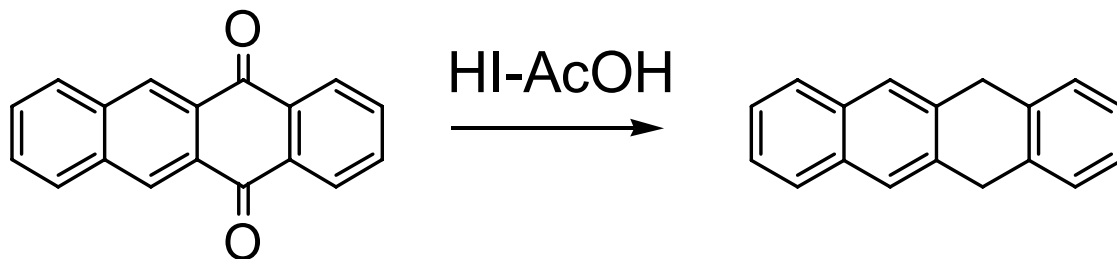

$^1\text{H}$  NMR ( $\text{CDCl}_3$ ) of crude reaction mixture

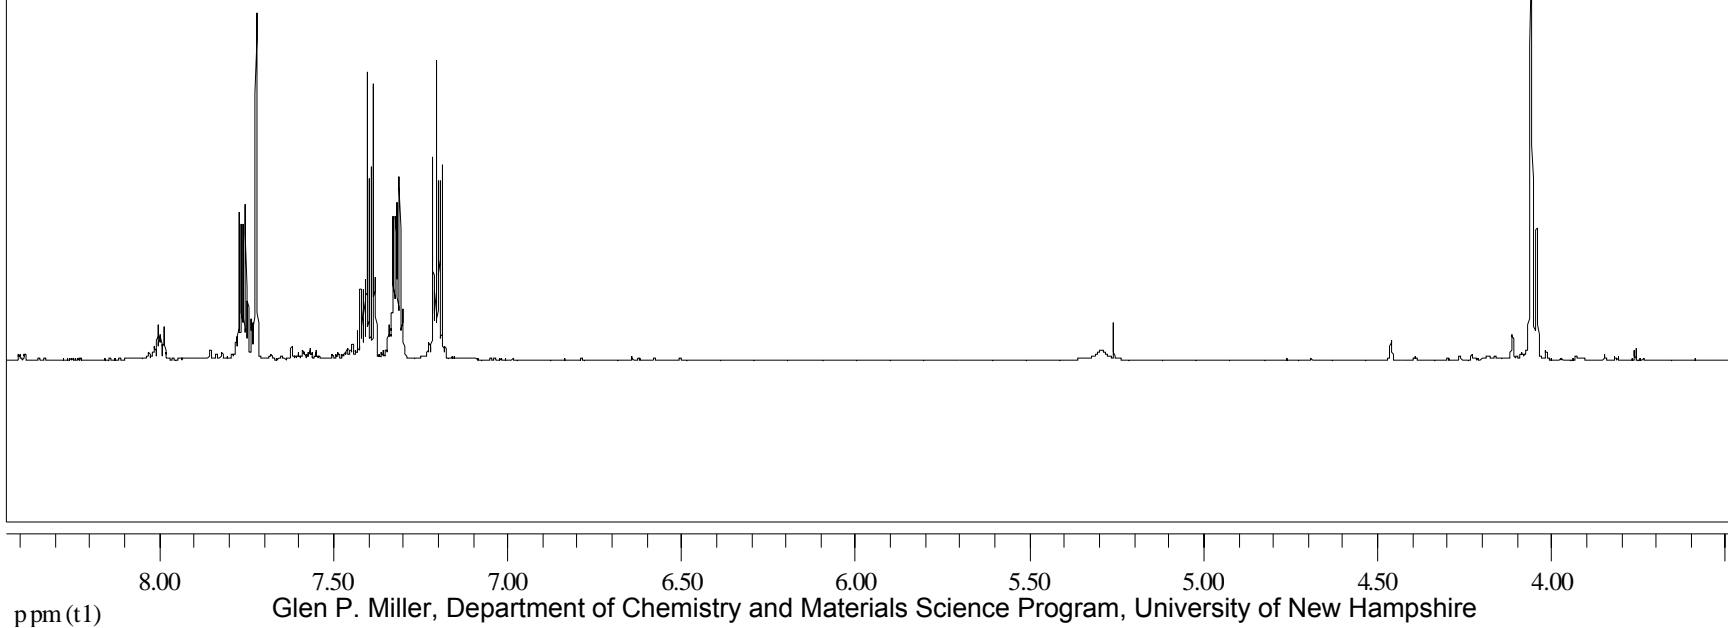

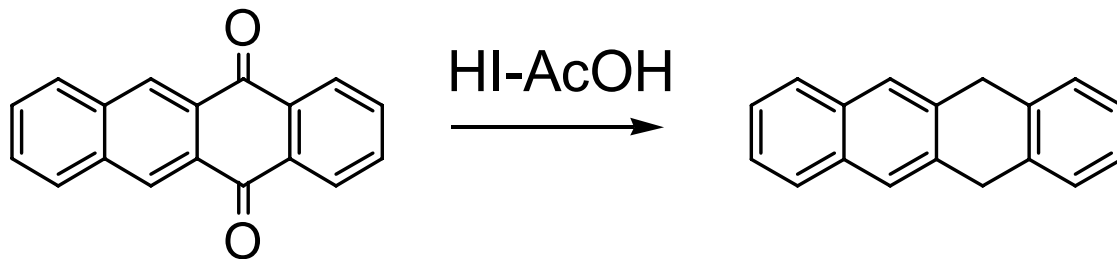

$^1\text{H}$  NMR ( $\text{CDCl}_3$ ) of purified product

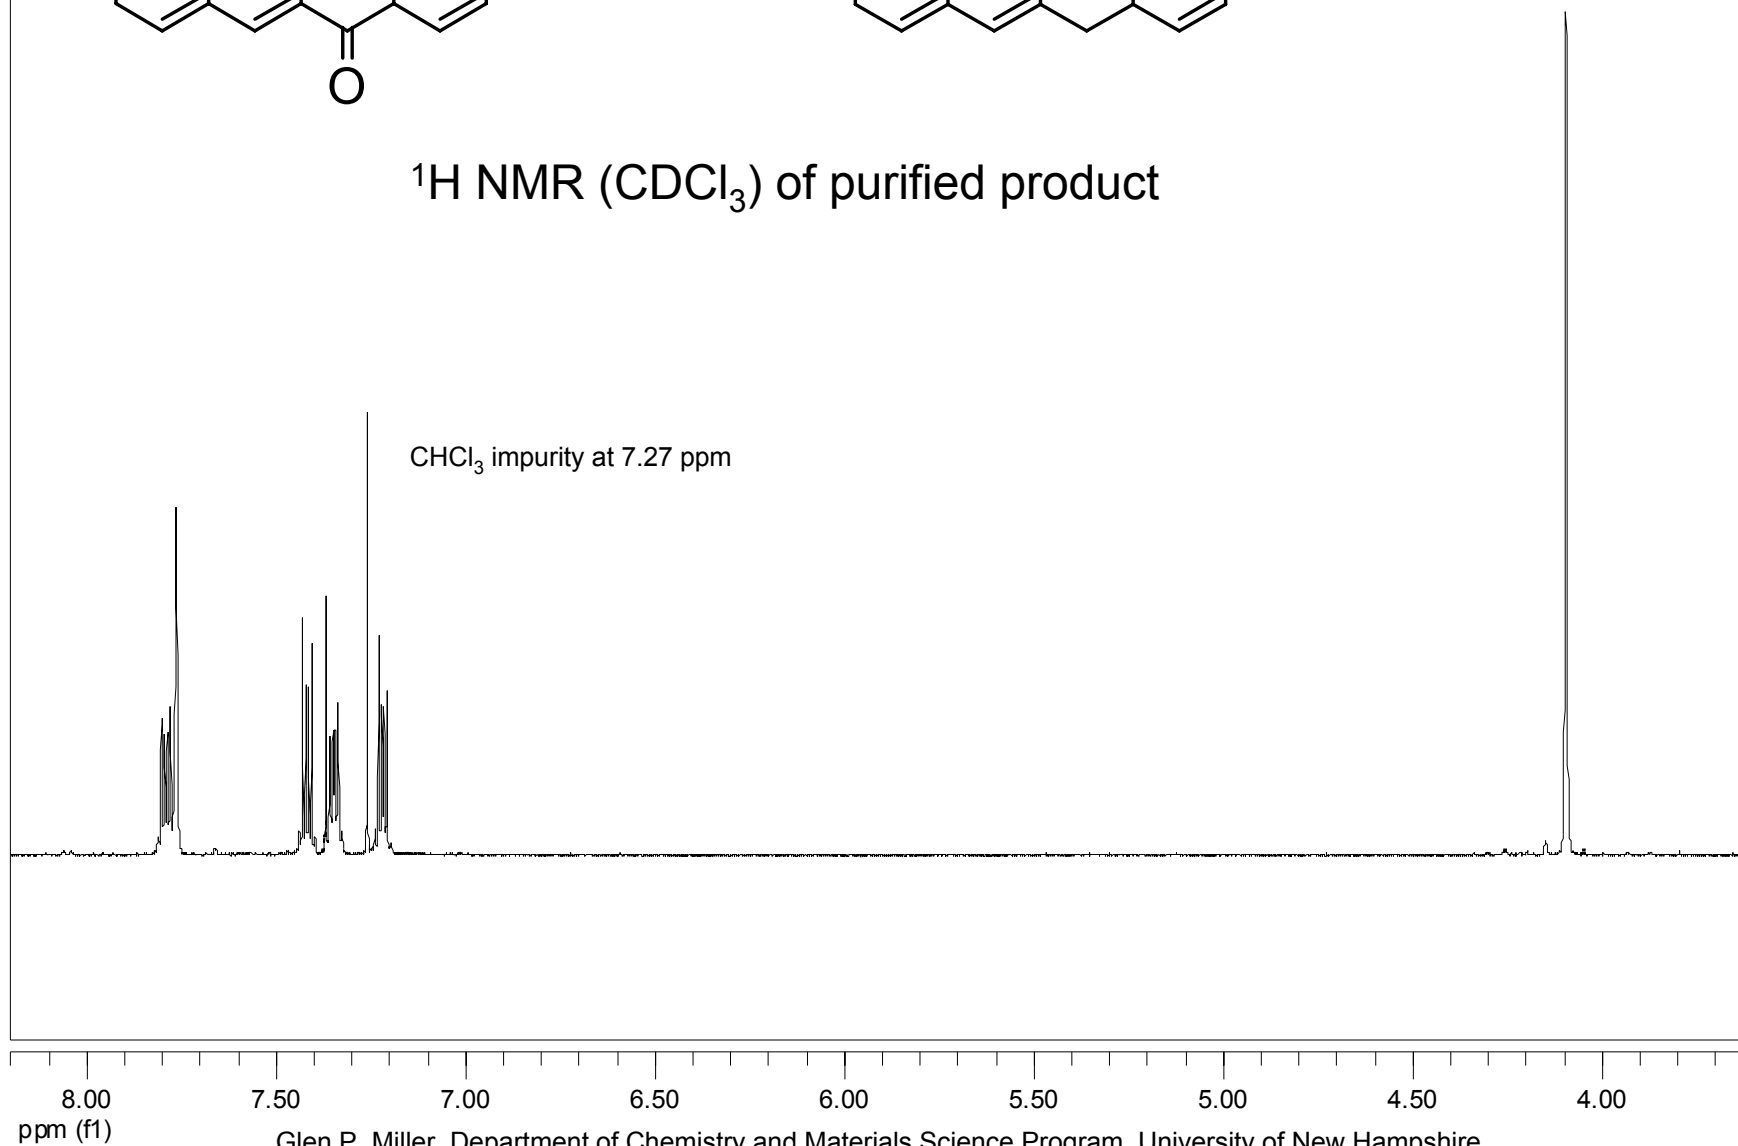

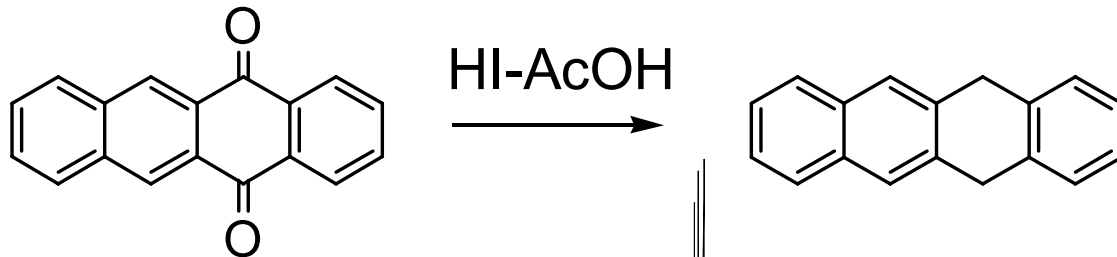

$^{13}\text{C}$  NMR of purified product

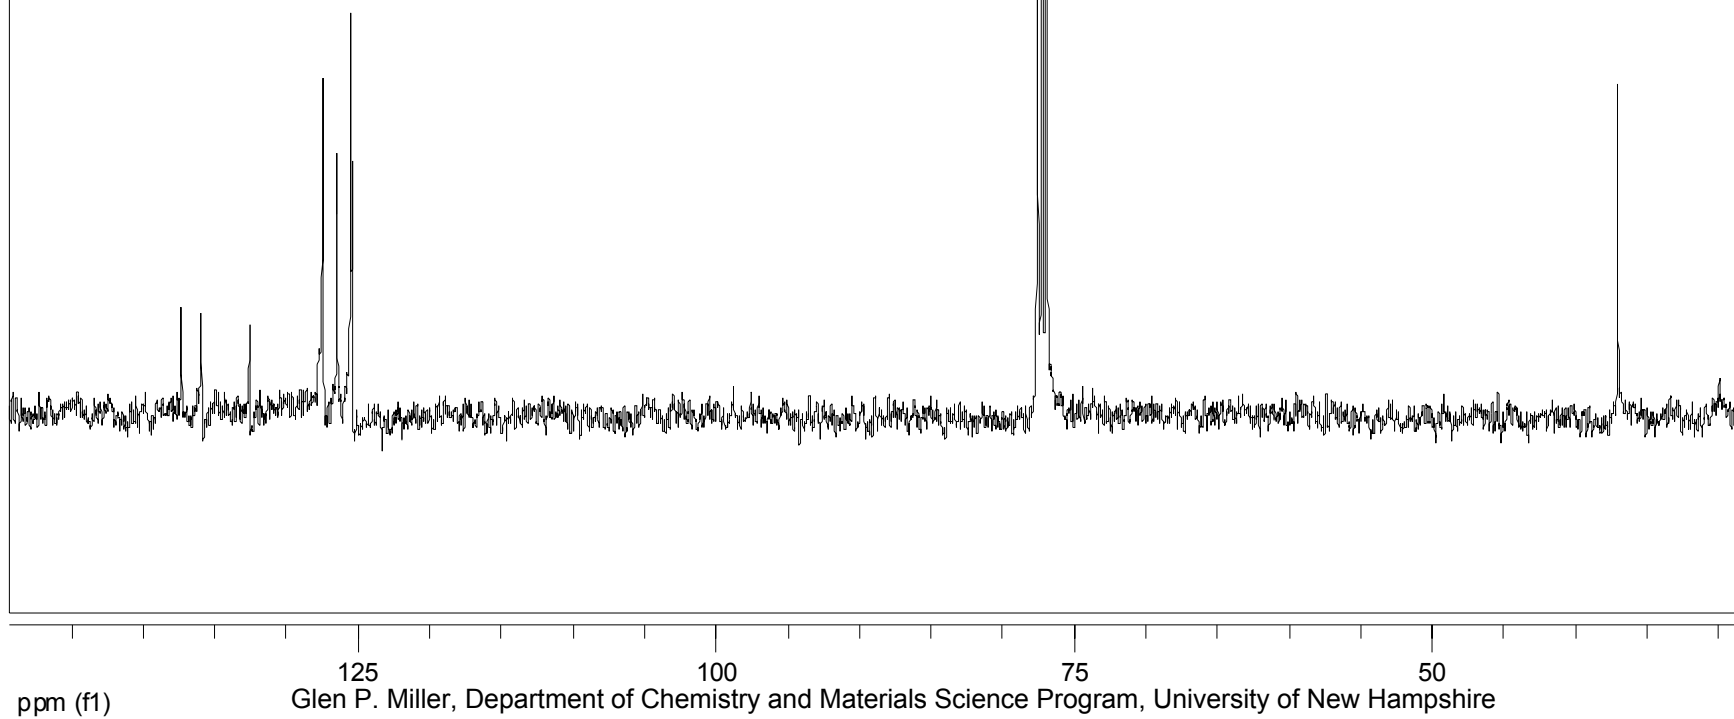

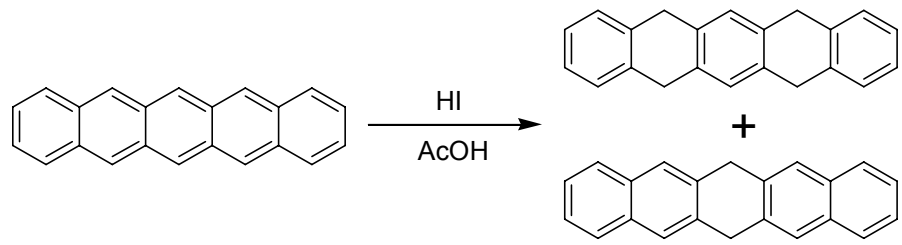

<sup>1</sup>H NMR (CDCl<sub>3</sub>) of crude product

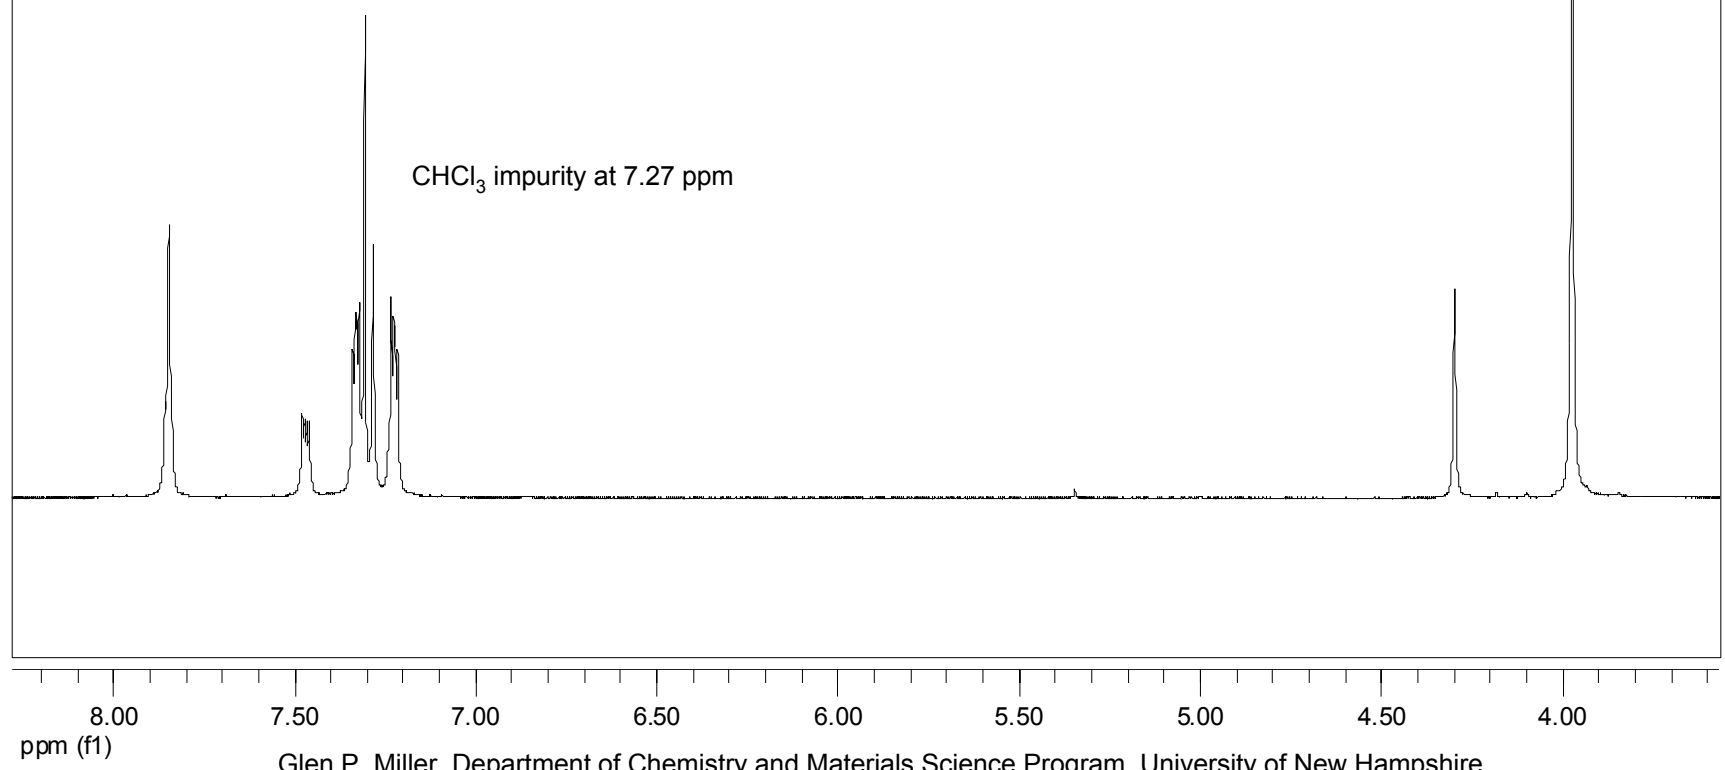

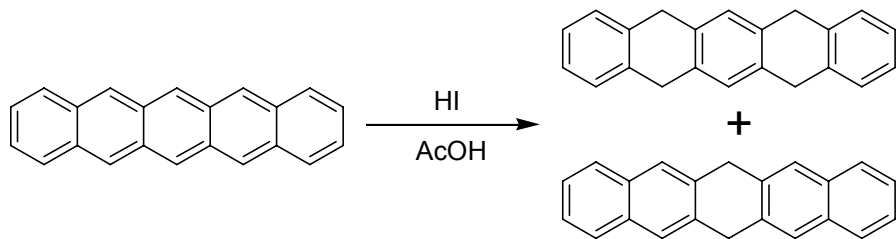

<sup>1</sup>H NMR (CDCl<sub>3</sub>) of crude product

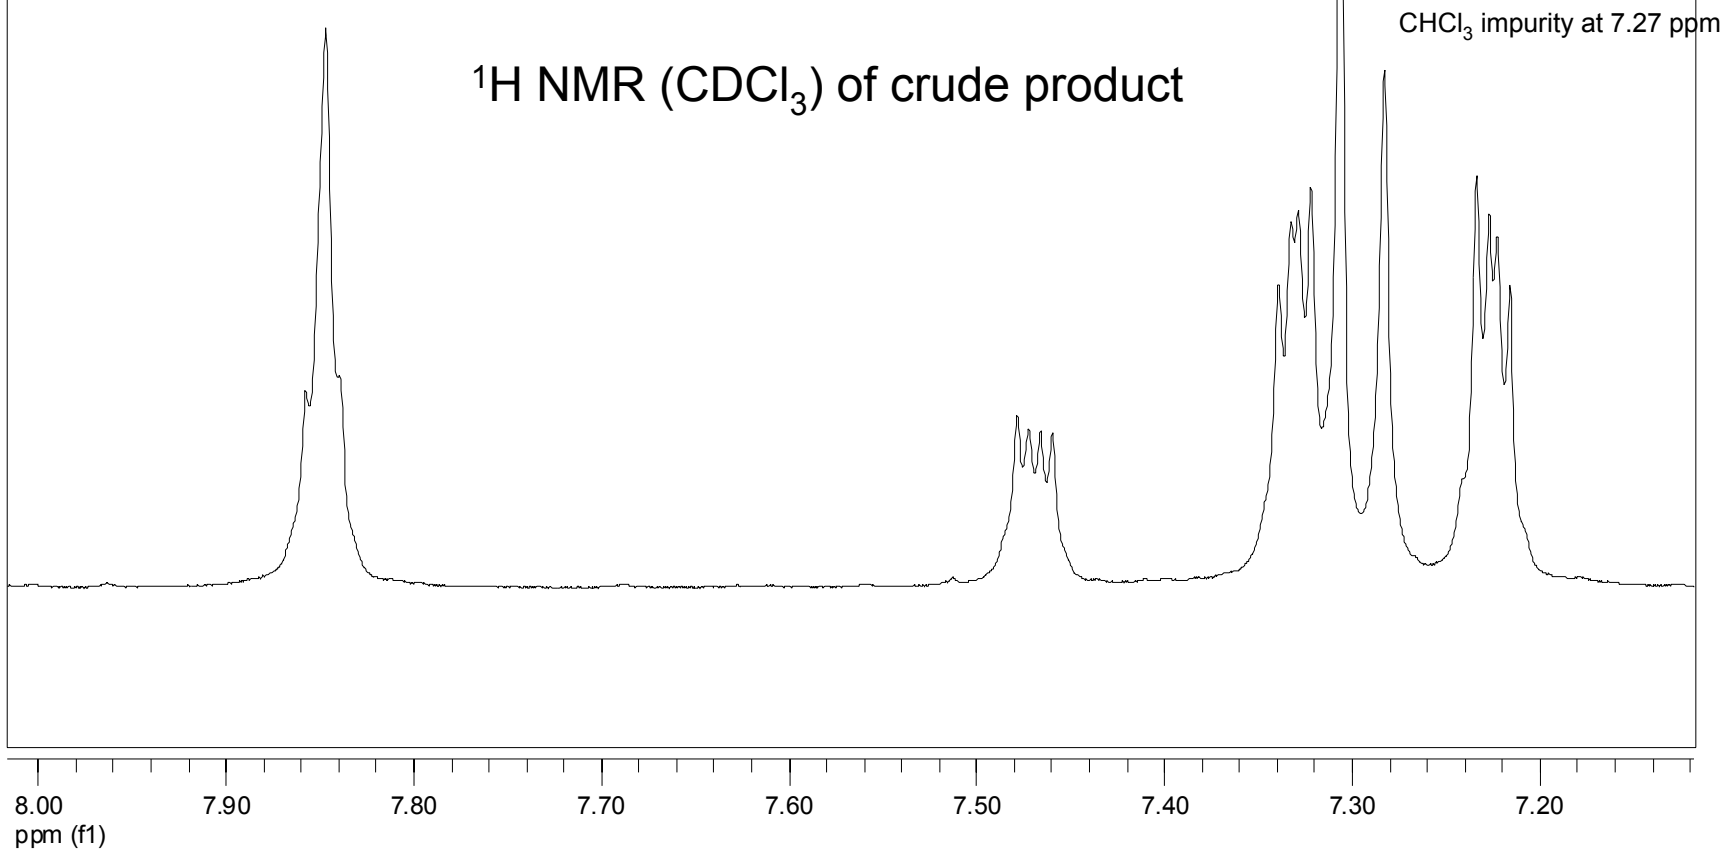



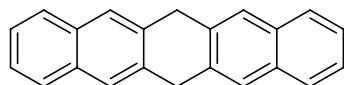

$^1\text{H}$  NMR ( $\text{CDCl}_3$ )

Synthesized independently for comparison

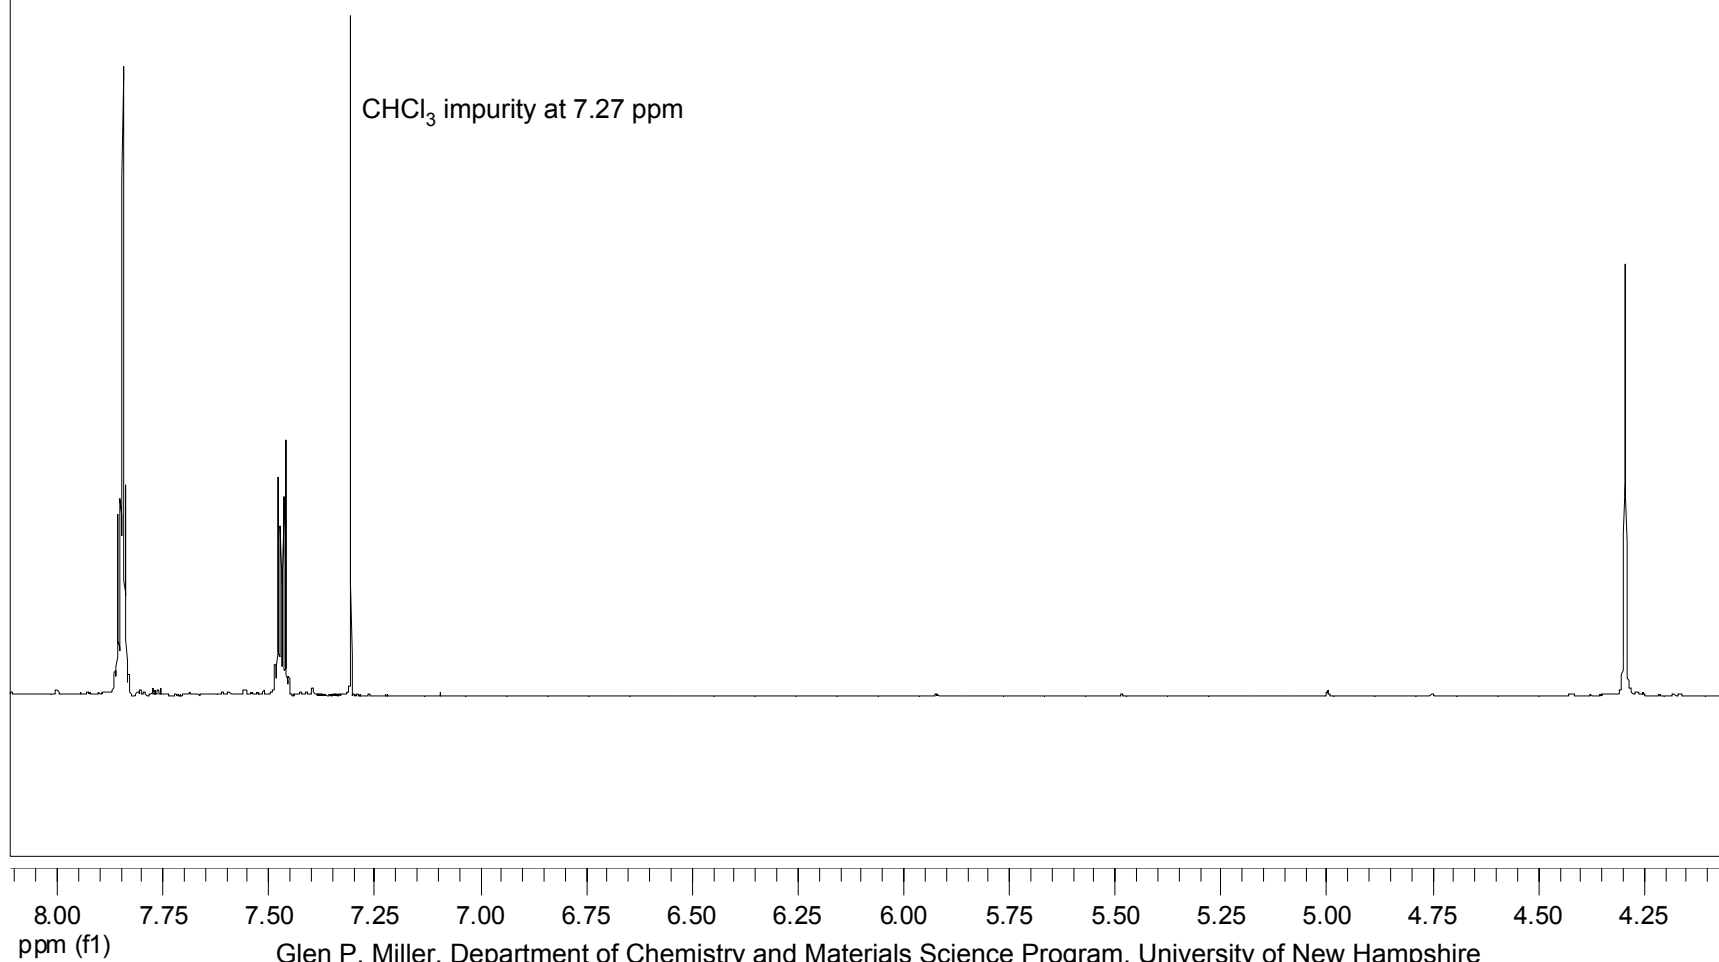

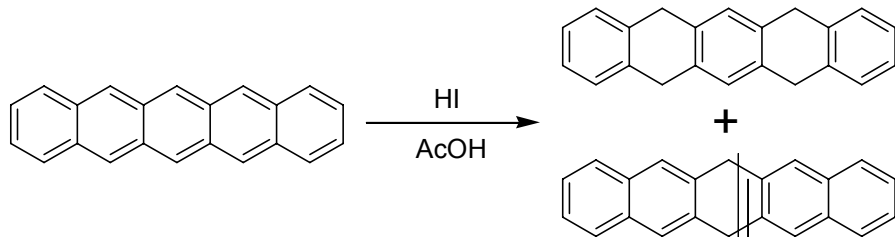

$^{13}\text{C}$  NMR ( $\text{CDCl}_3$ ) of crude product

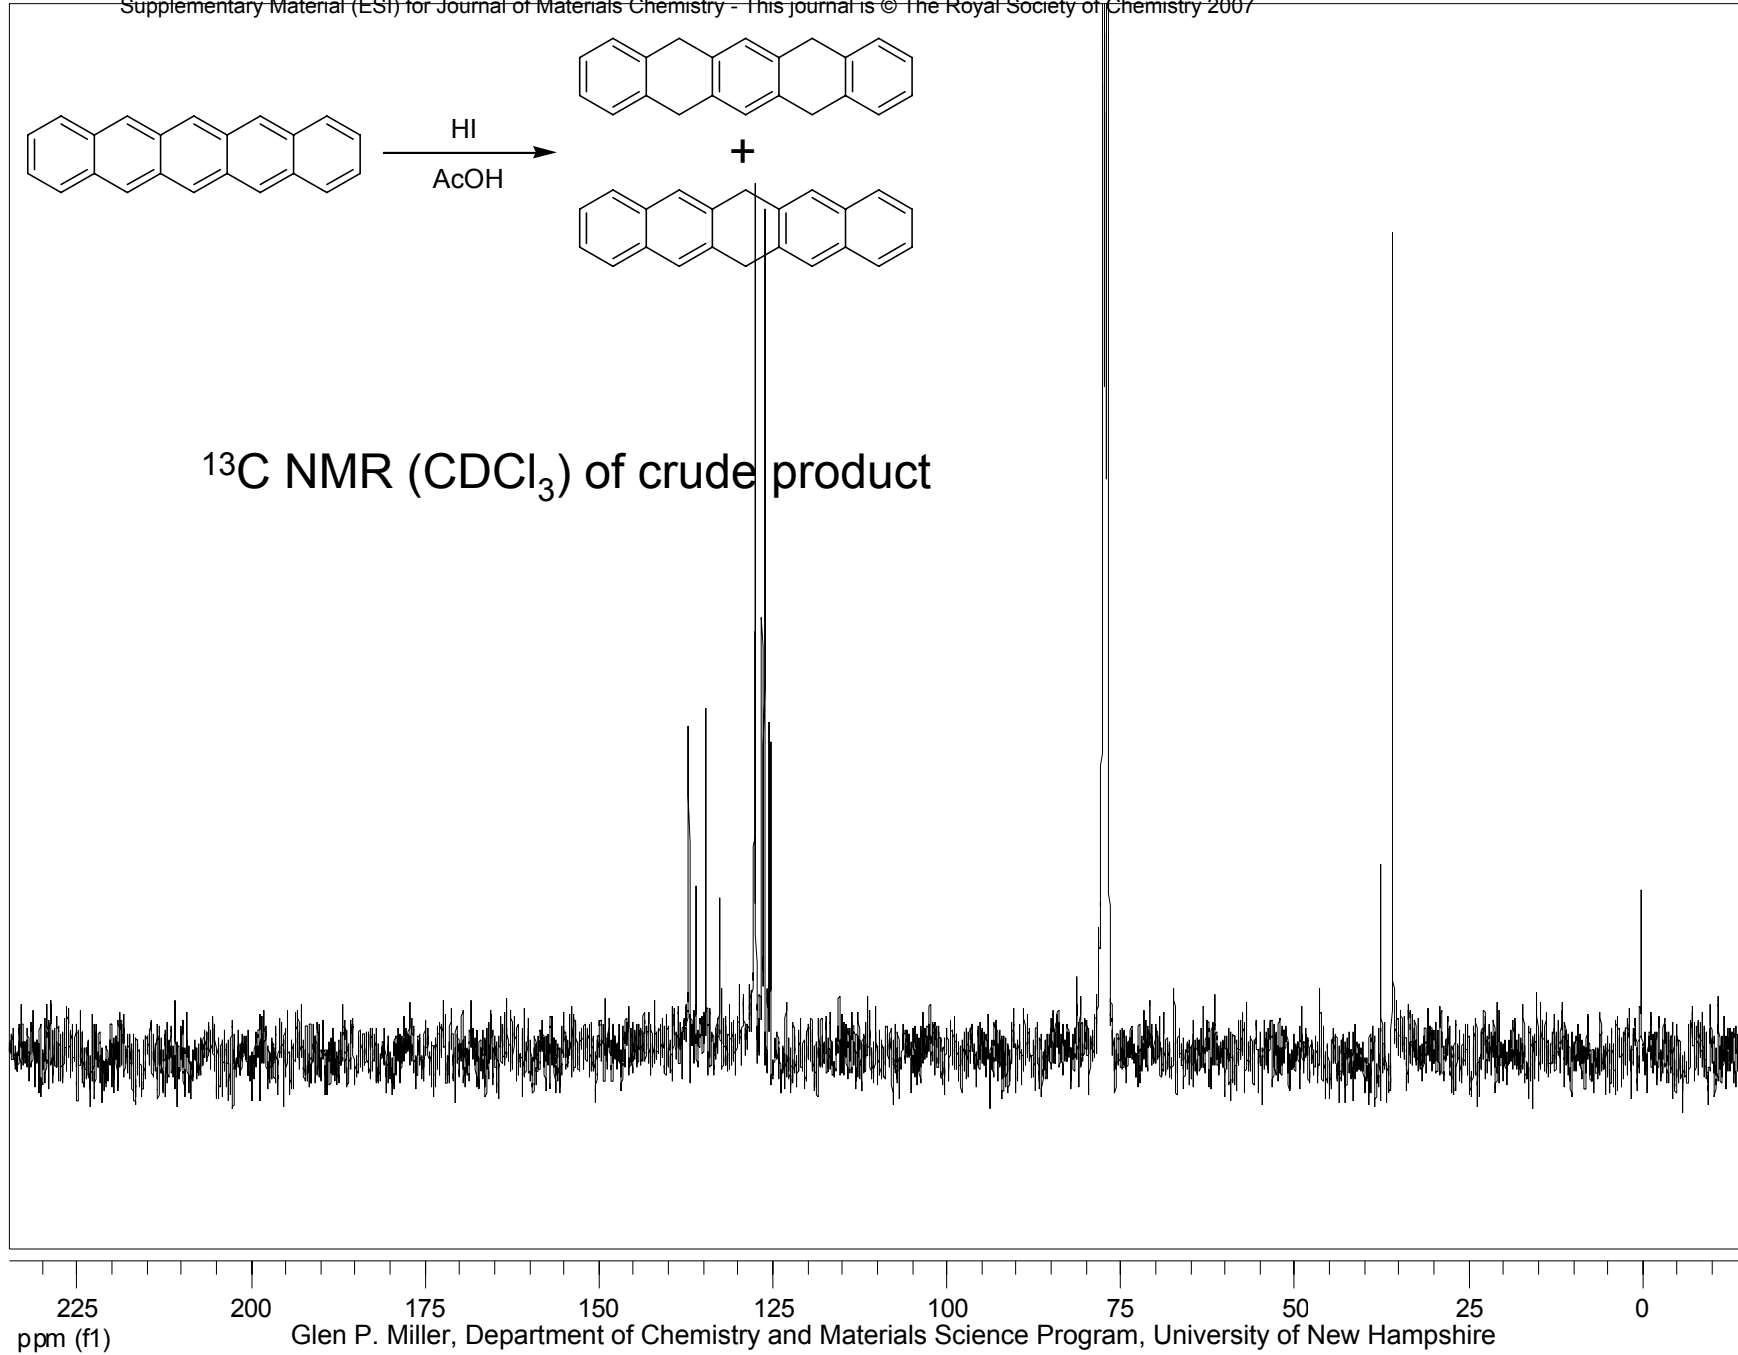

# $^{13}\text{C}$ NMR ( $\text{CDCl}_3$ ) of crude product

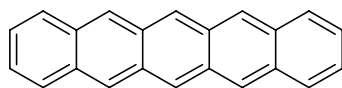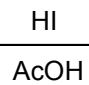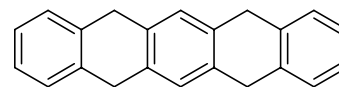

+

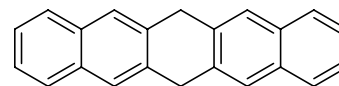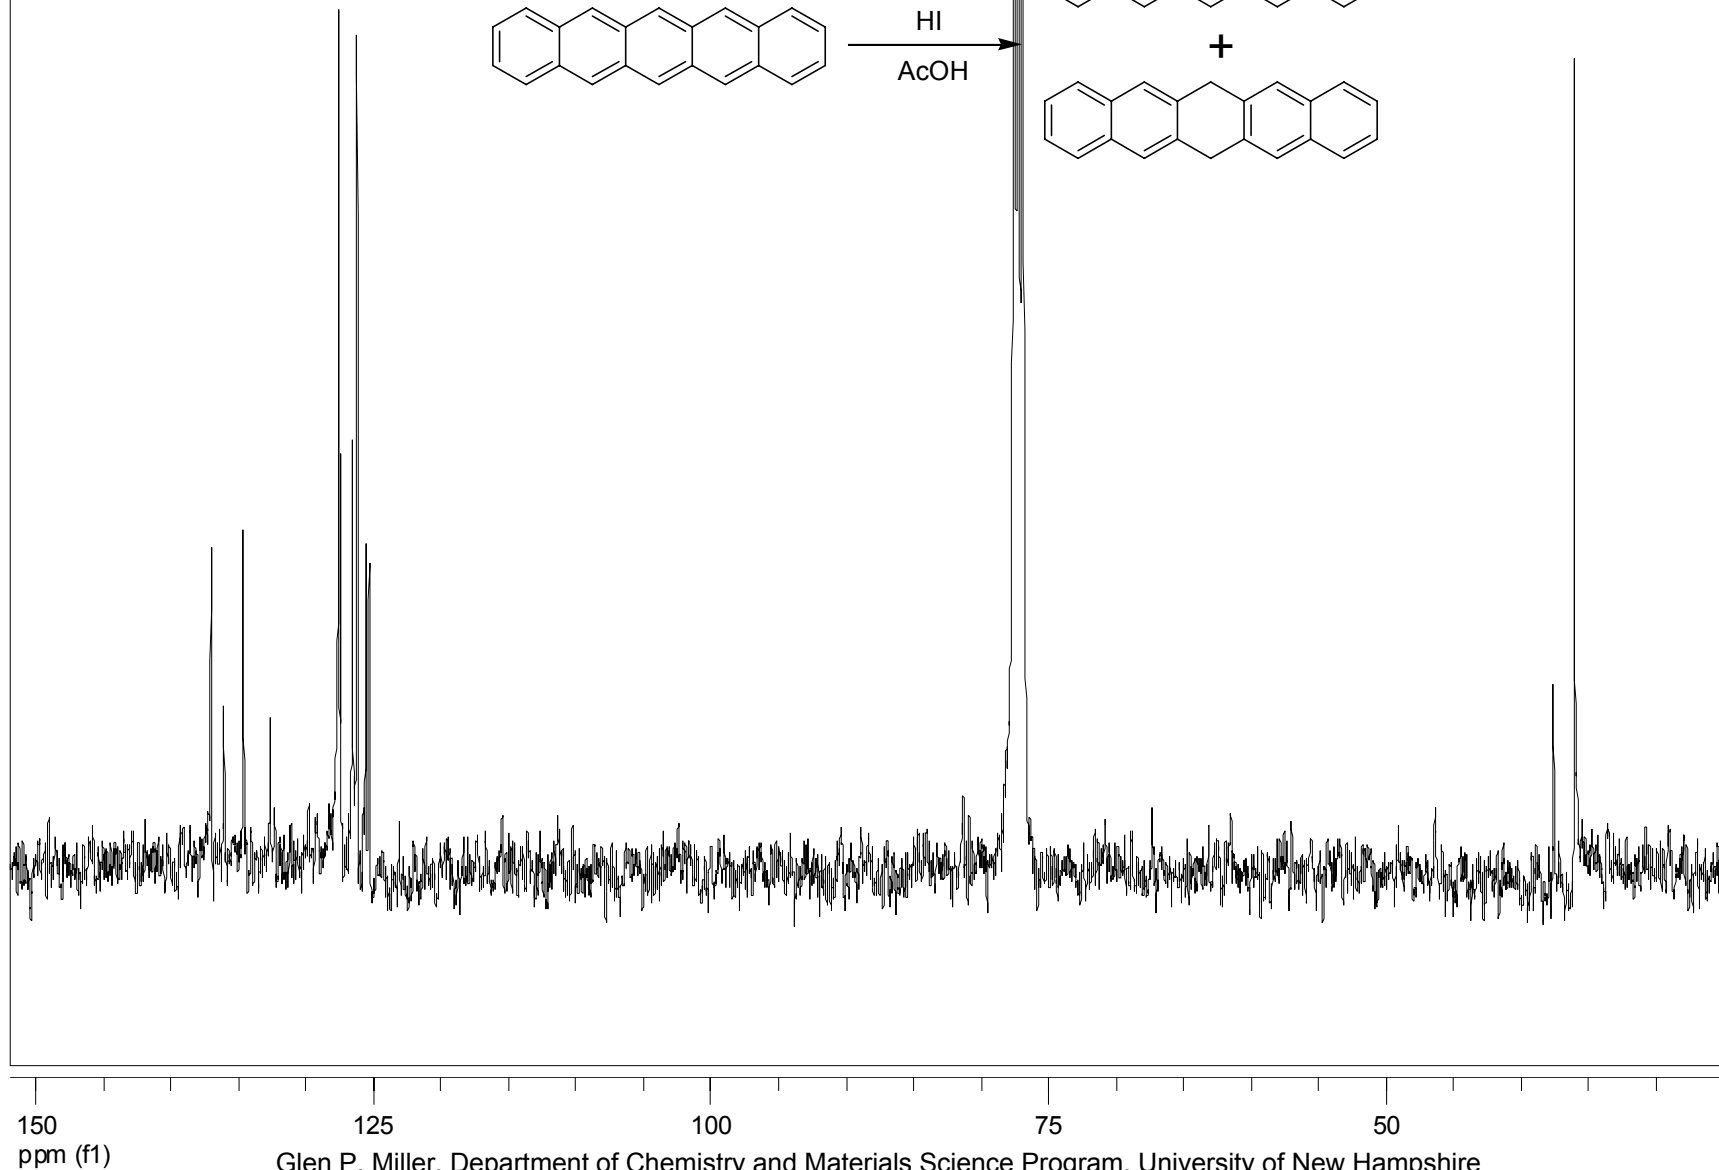

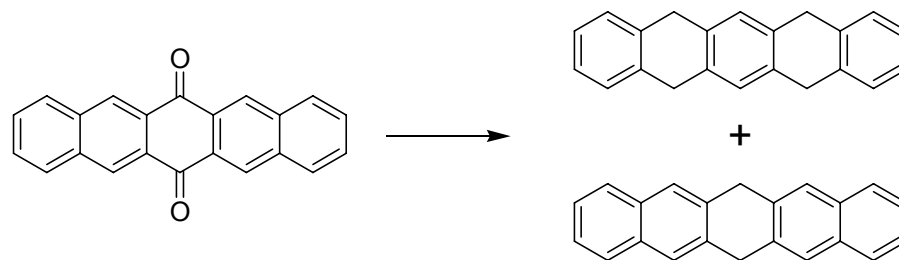

<sup>1</sup>H NMR (CDCl<sub>3</sub>) of crude product

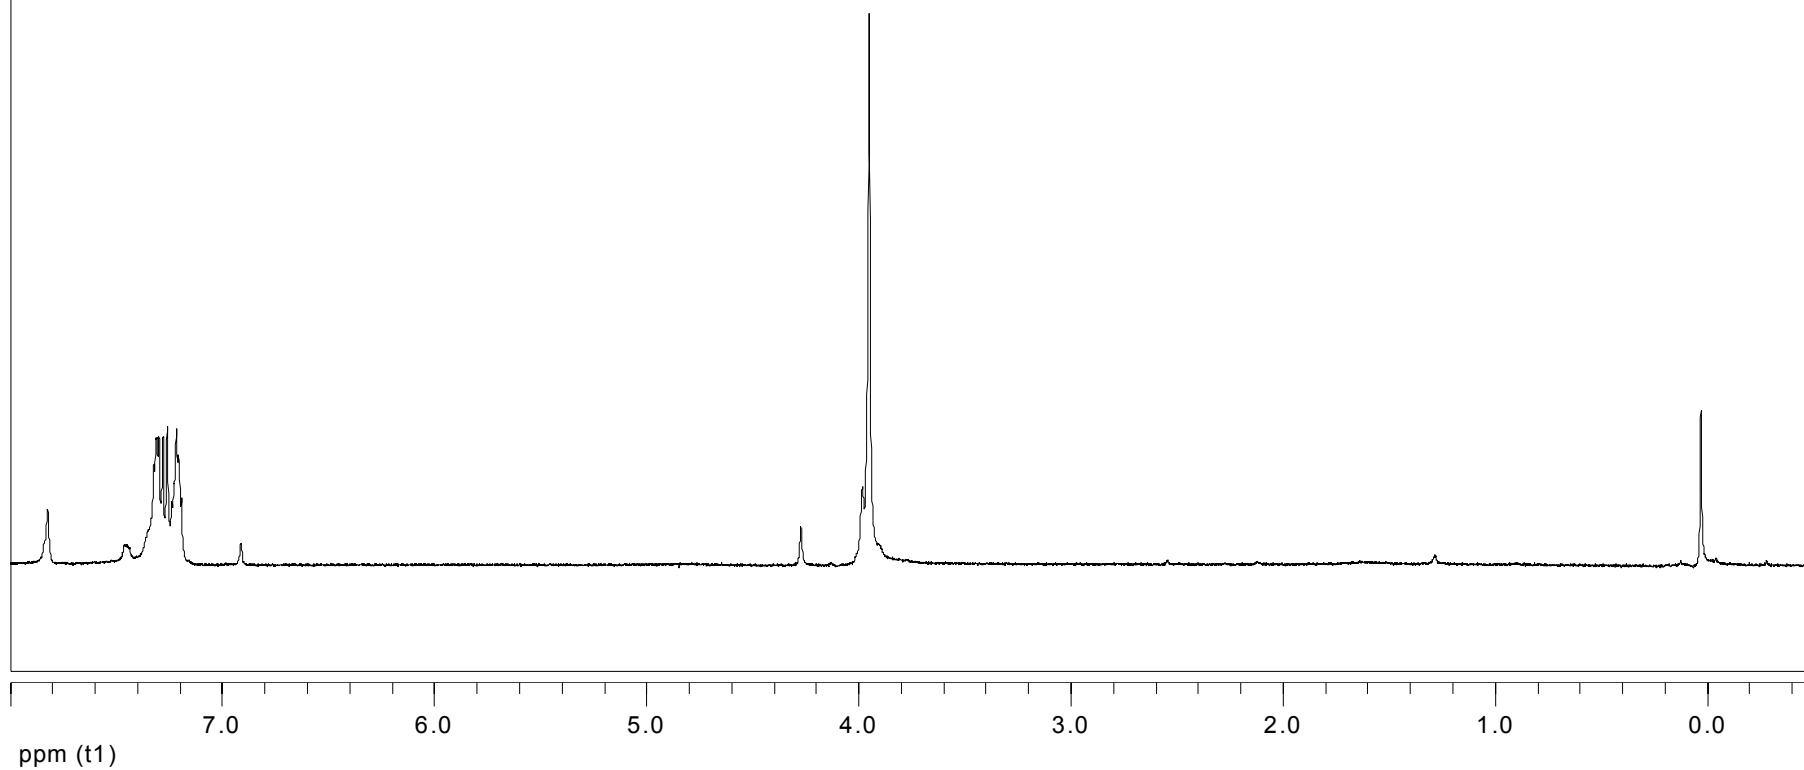

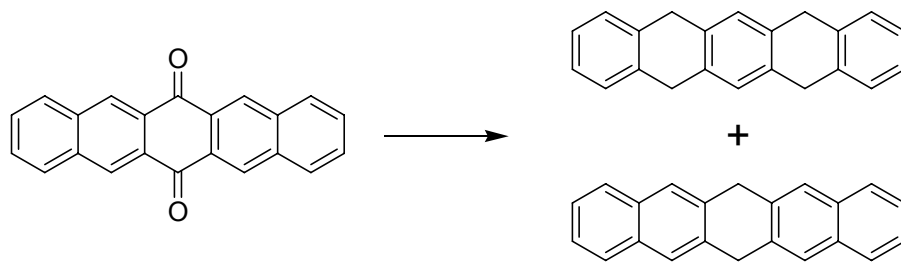

$^1\text{H}$  NMR ( $\text{CDCl}_3$ ) of crude product

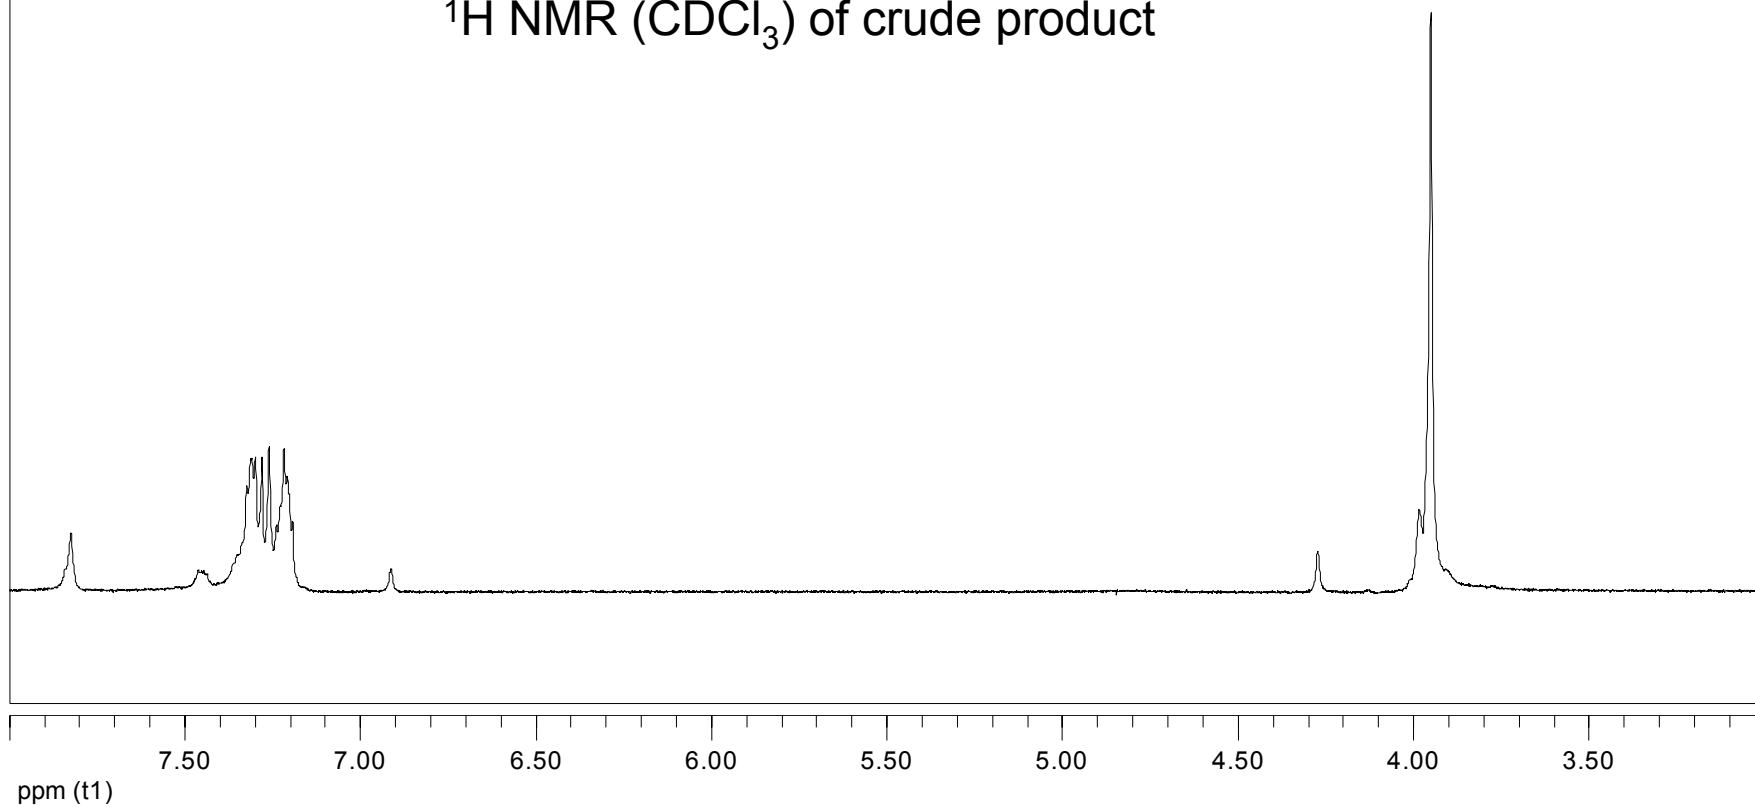

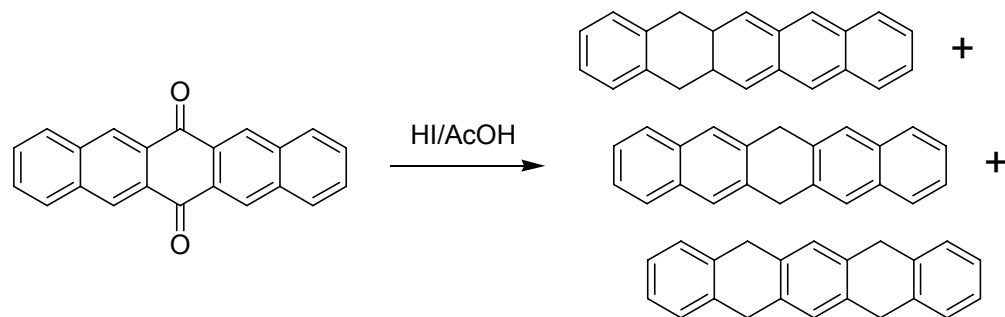

$^{13}\text{C}$  NMR ( $\text{CDCl}_3$ ) of crude product

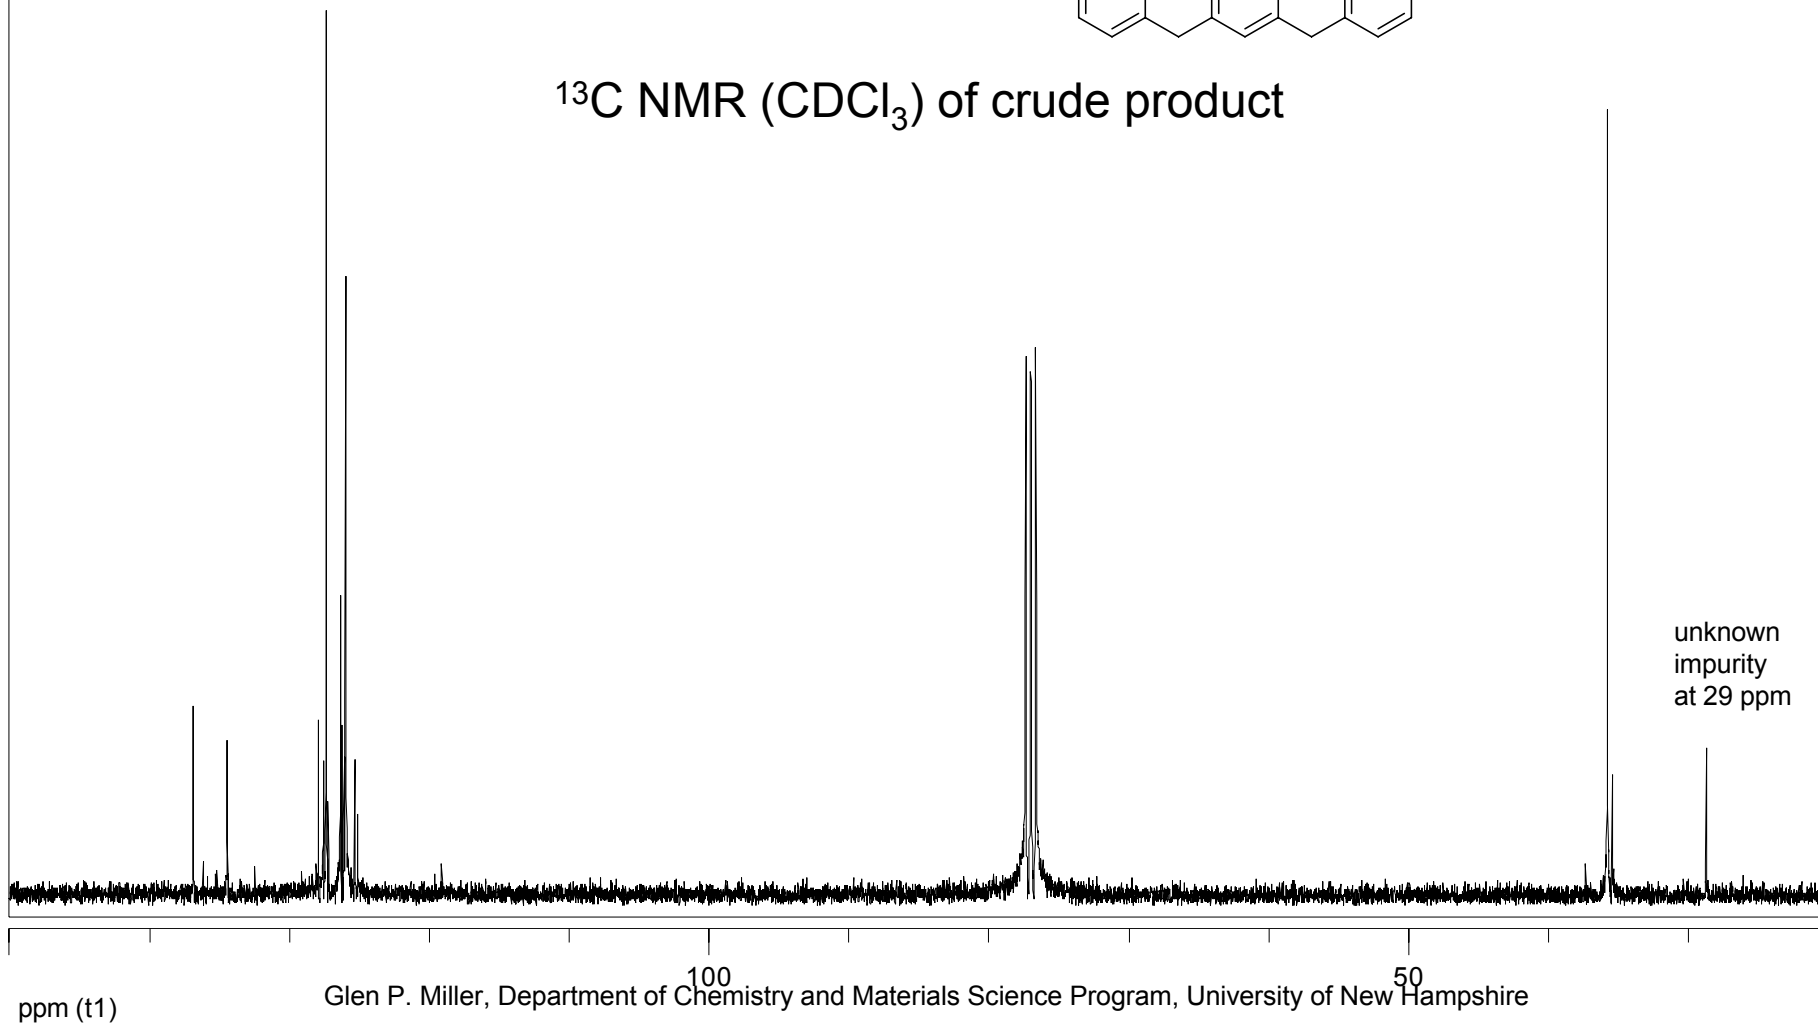

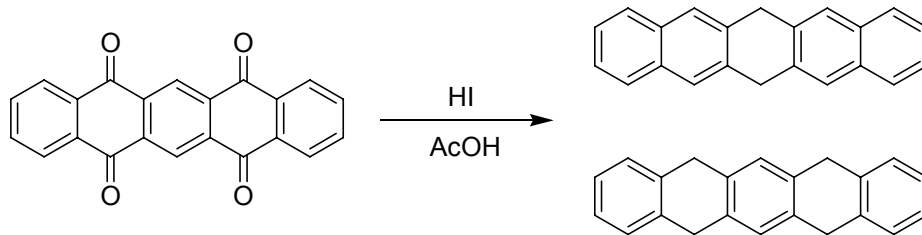

### $^1\text{H}$ NMR ( $\text{CDCl}_3$ ) of crude product

$\text{CHCl}_3$  impurity at 7.27 ppm

$\text{CH}_2\text{Cl}_2$  impurity

8.00  
ppm (f1)

7.50

7.00

6.50

6.00

5.50

5.00

4.50

4.00

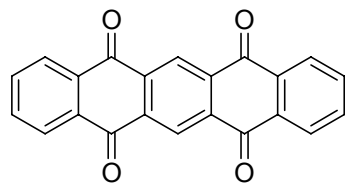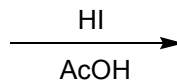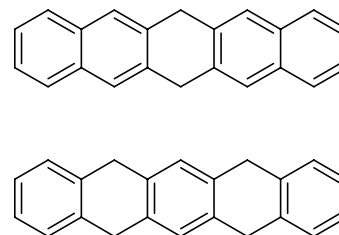

<sup>13</sup>C NMR (CDCl<sub>3</sub>) of crude product

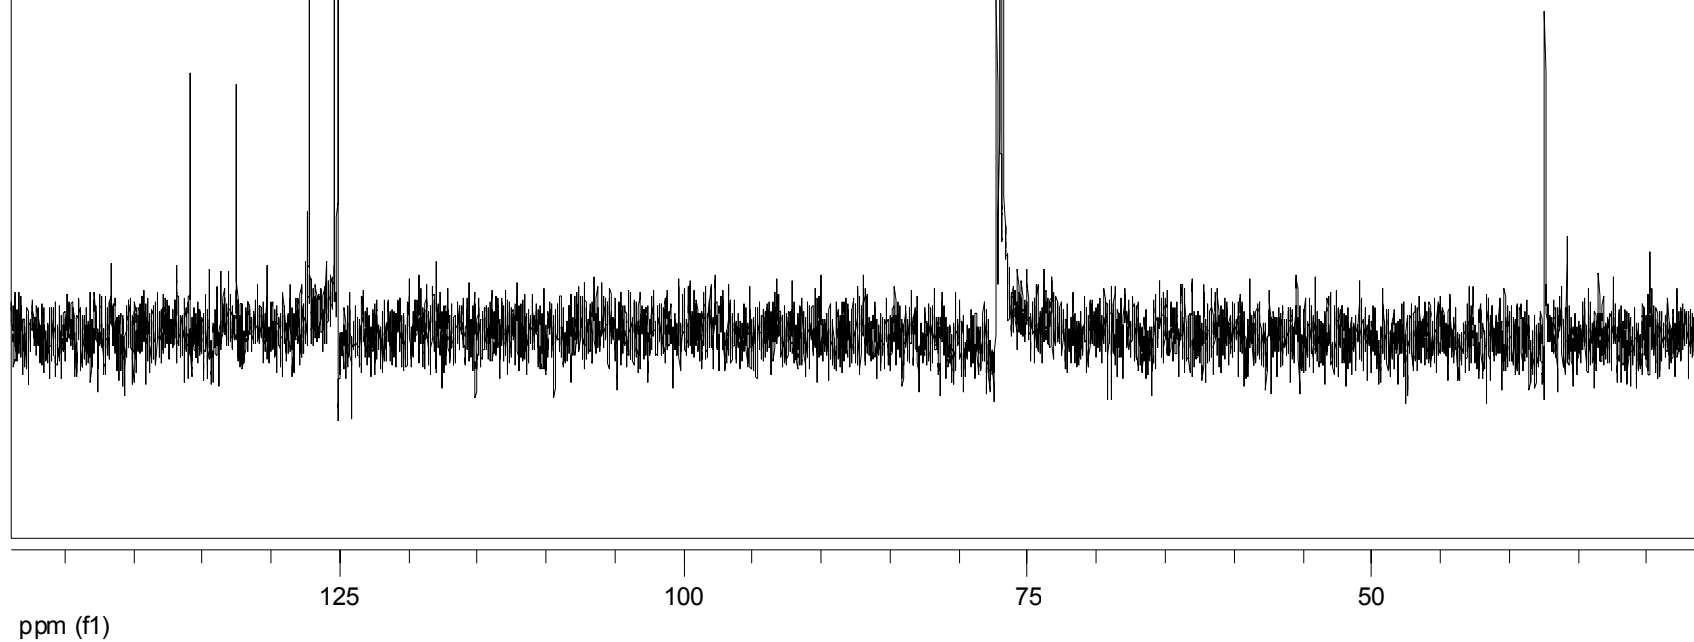



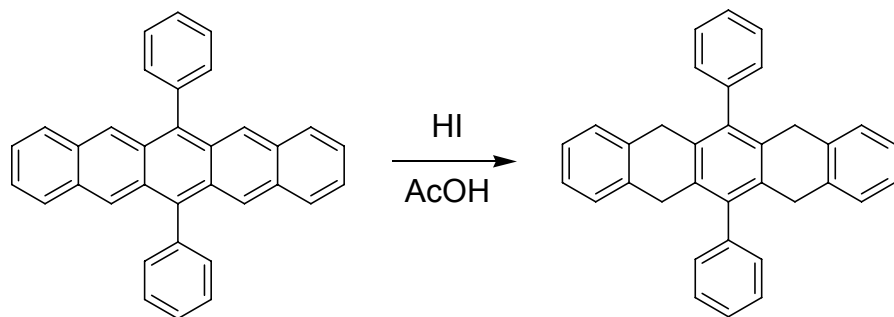

<sup>1</sup>H NMR (CDCl<sub>3</sub>) of crude product

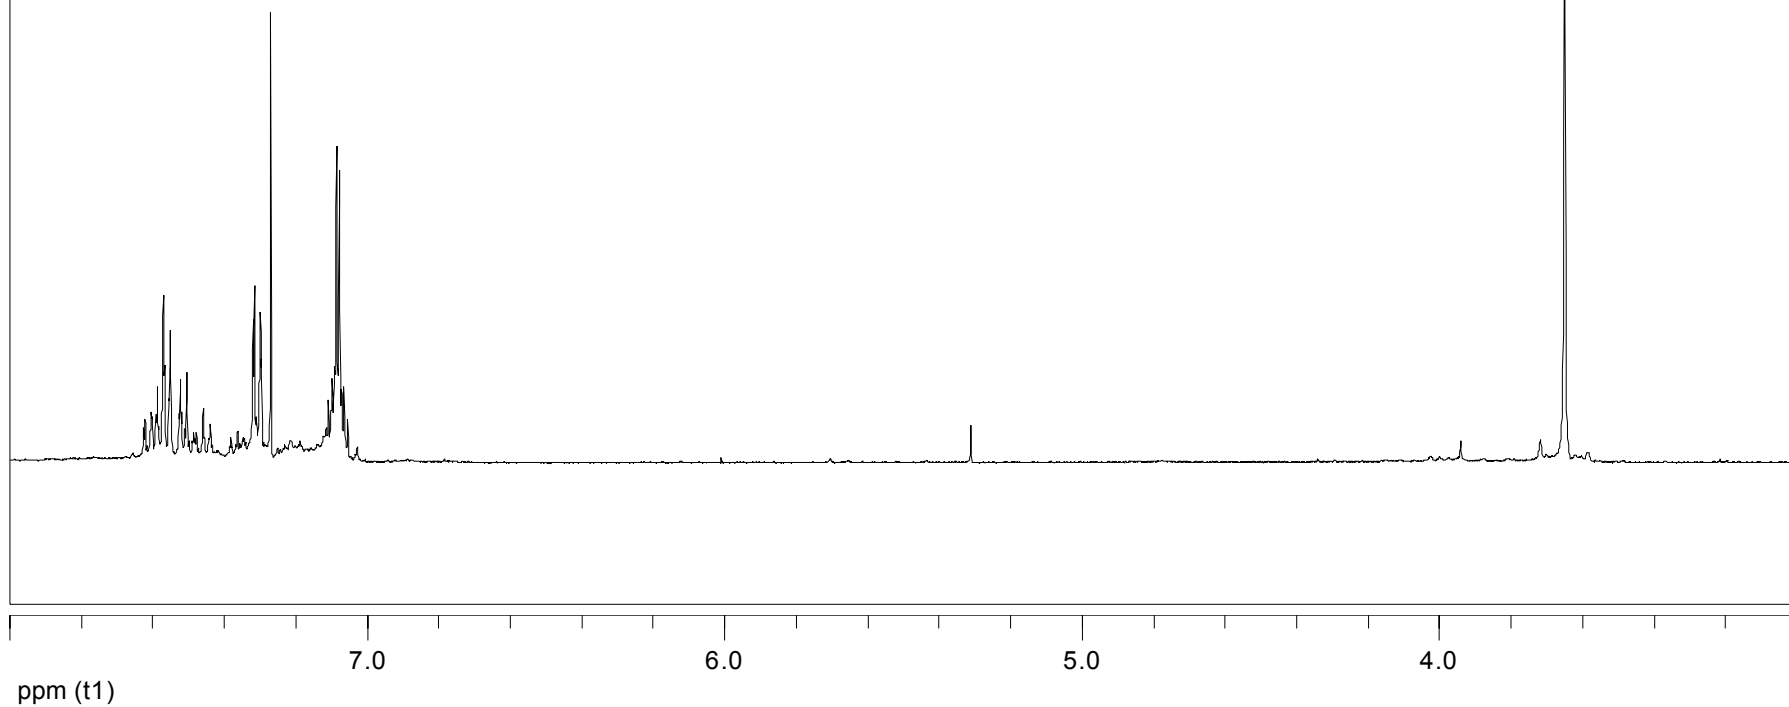

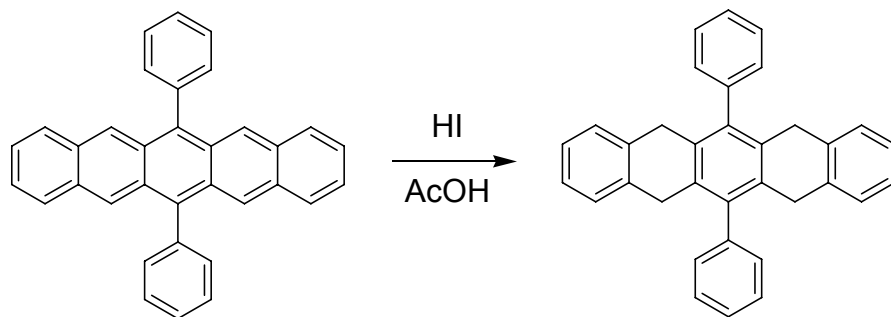

$^{13}\text{C}$  NMR ( $\text{CDCl}_3$ ) of crude product

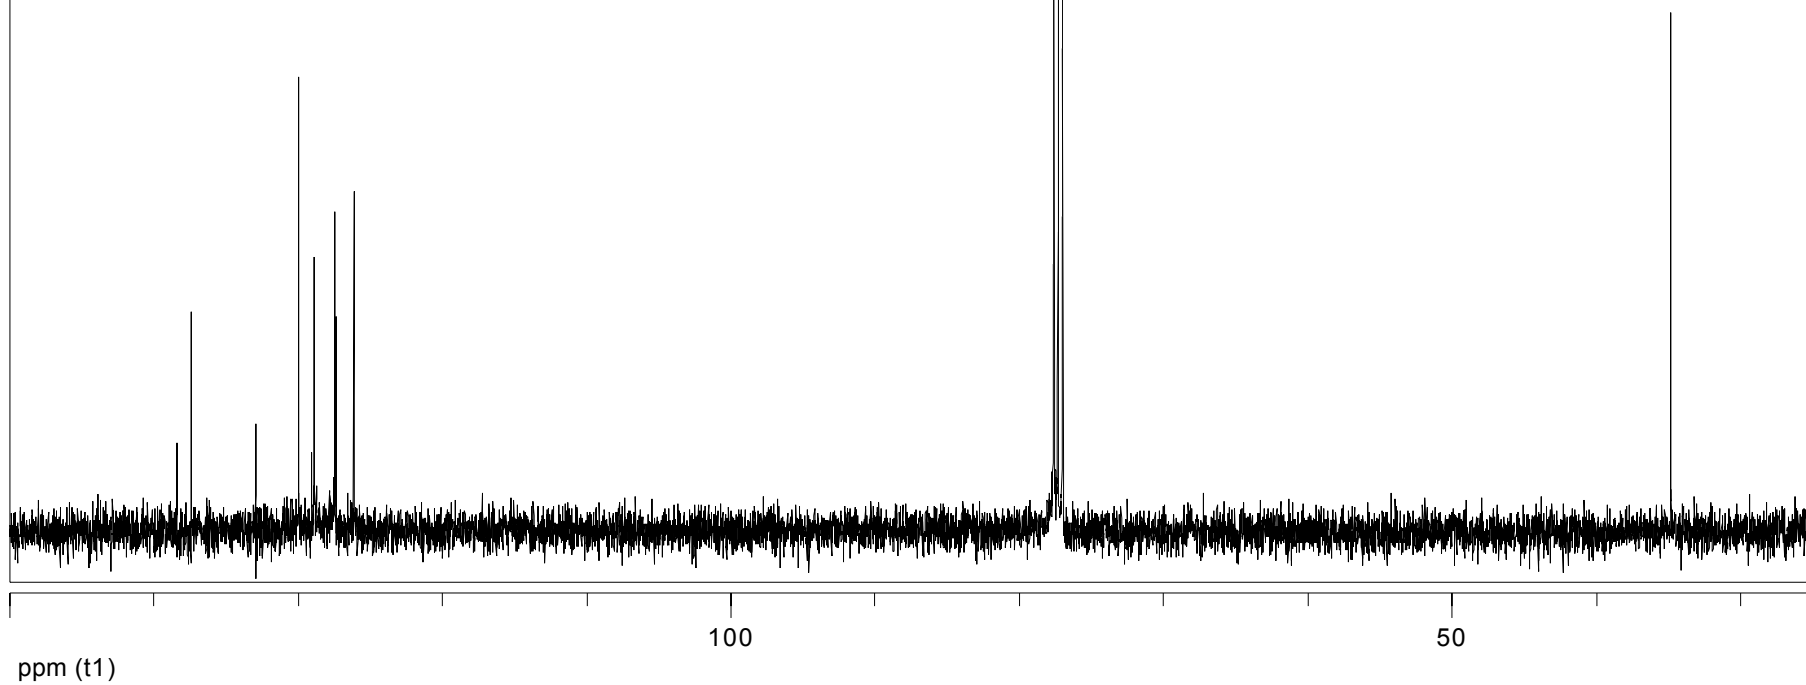

Data: DPTHP\_30001.A14 29 Jul 2005 10:50 Cal: David 28 Jun 2005 10:46  
Kratos PC Axima CFRplus V2.3.4: Mode reflectron\_1ghz, Power: 48, P.Ext. @ 2000 (bin 144)

275 mV[sum= 41284 mV] Profiles 1-150 Smooth Av 2 -Baseline 80

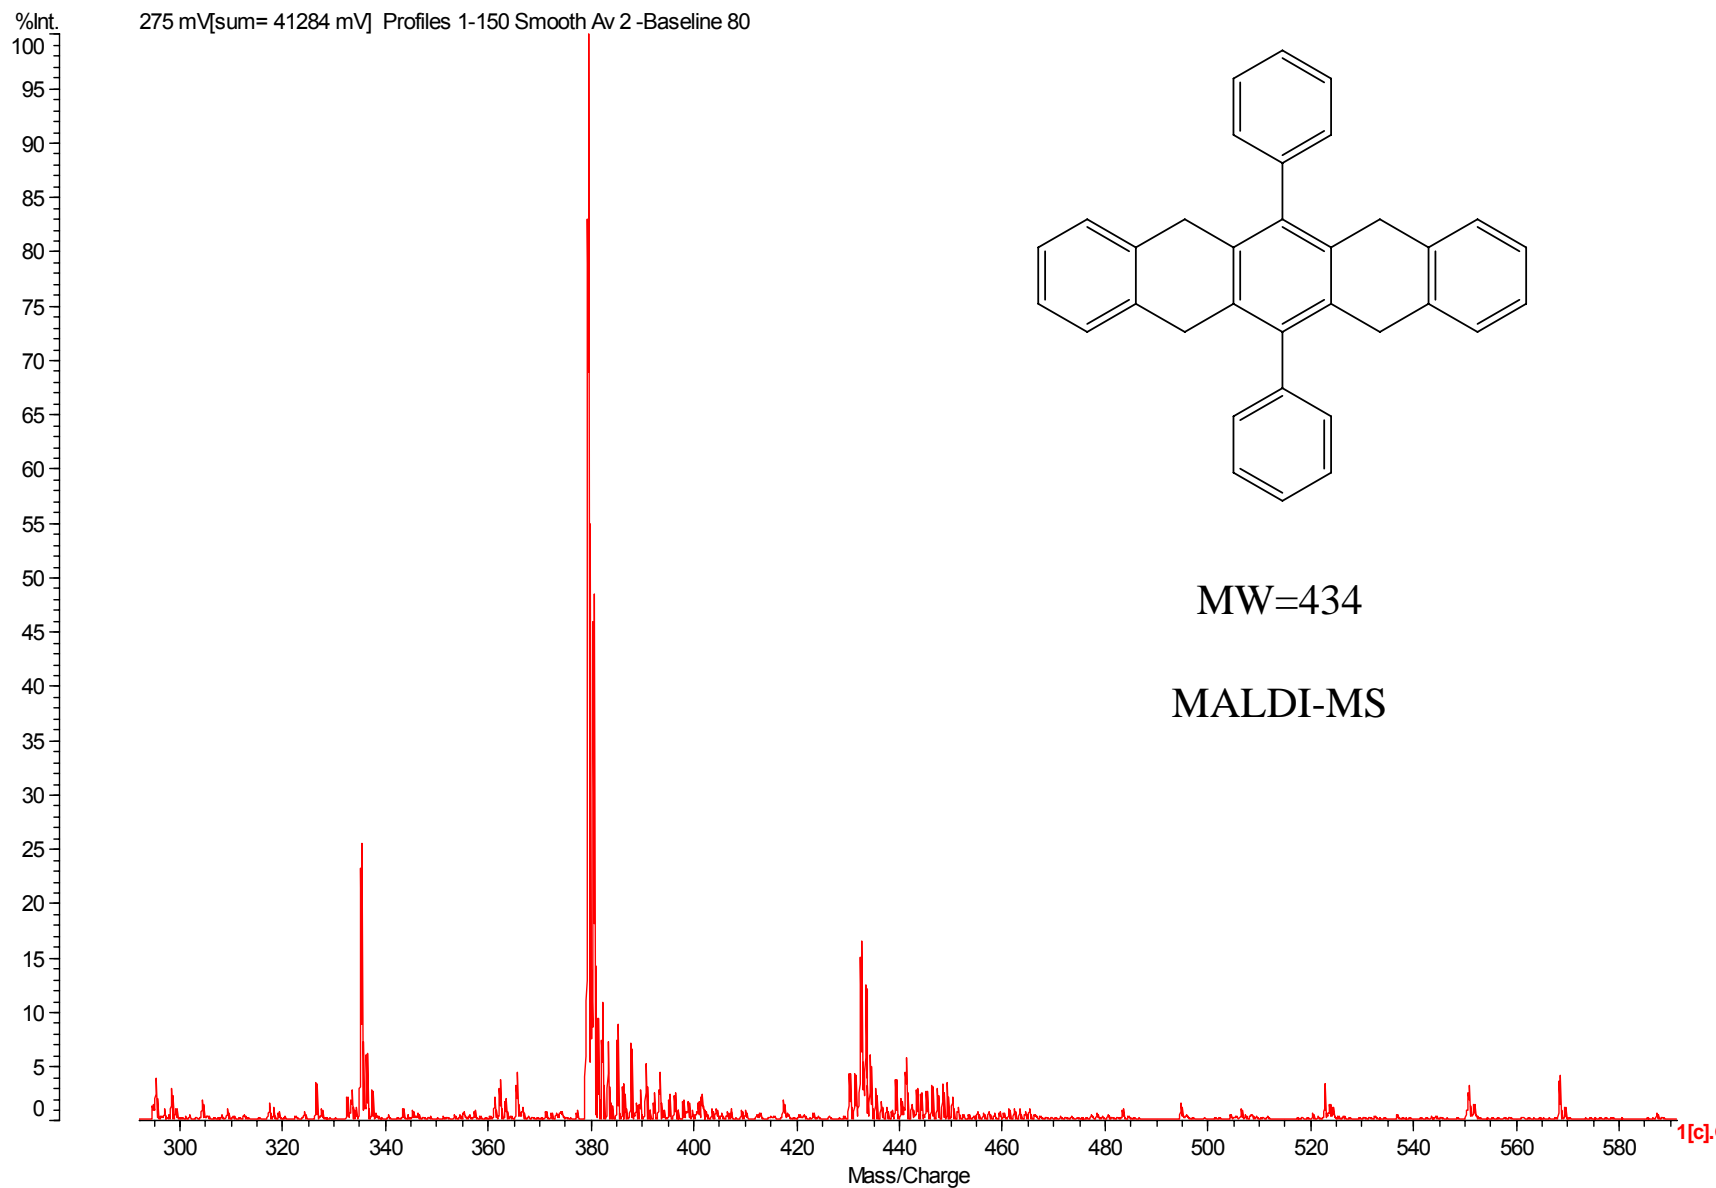

MW=434

MALDI-MS

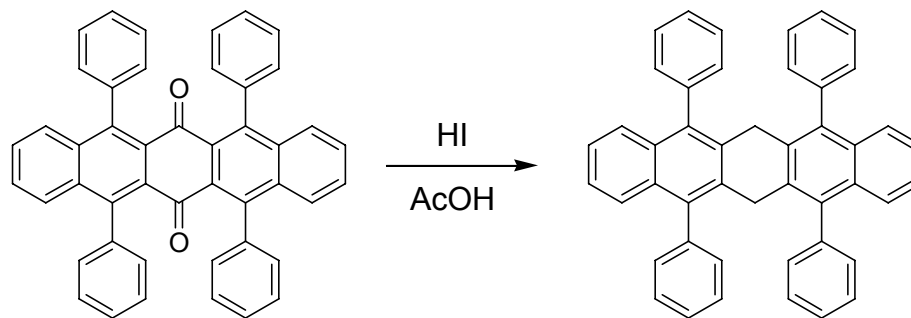

$^1\text{H}$  NMR ( $\text{CDCl}_3$ ) of crude product

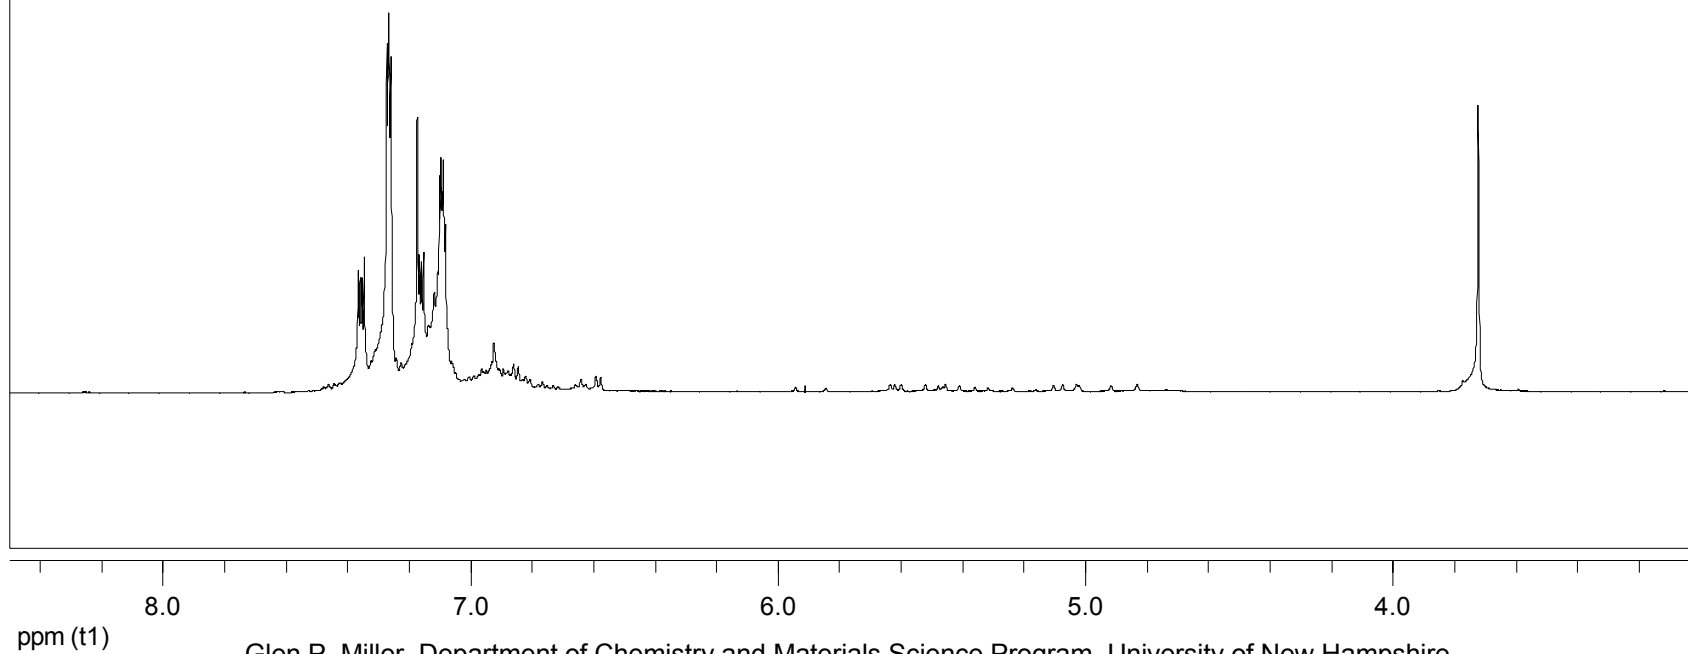

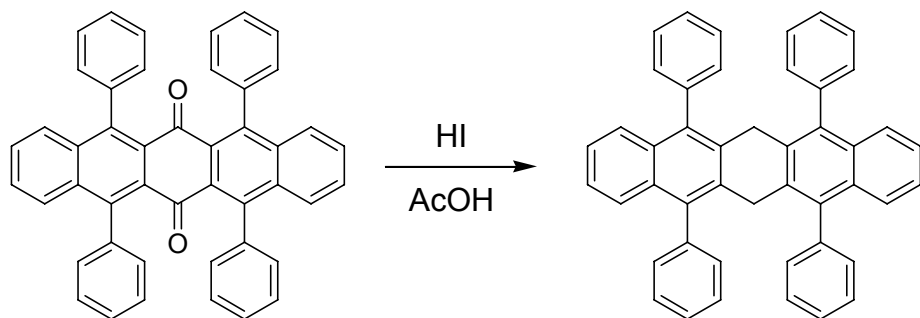

<sup>13</sup>C NMR (CDCl<sub>3</sub>) of crude product

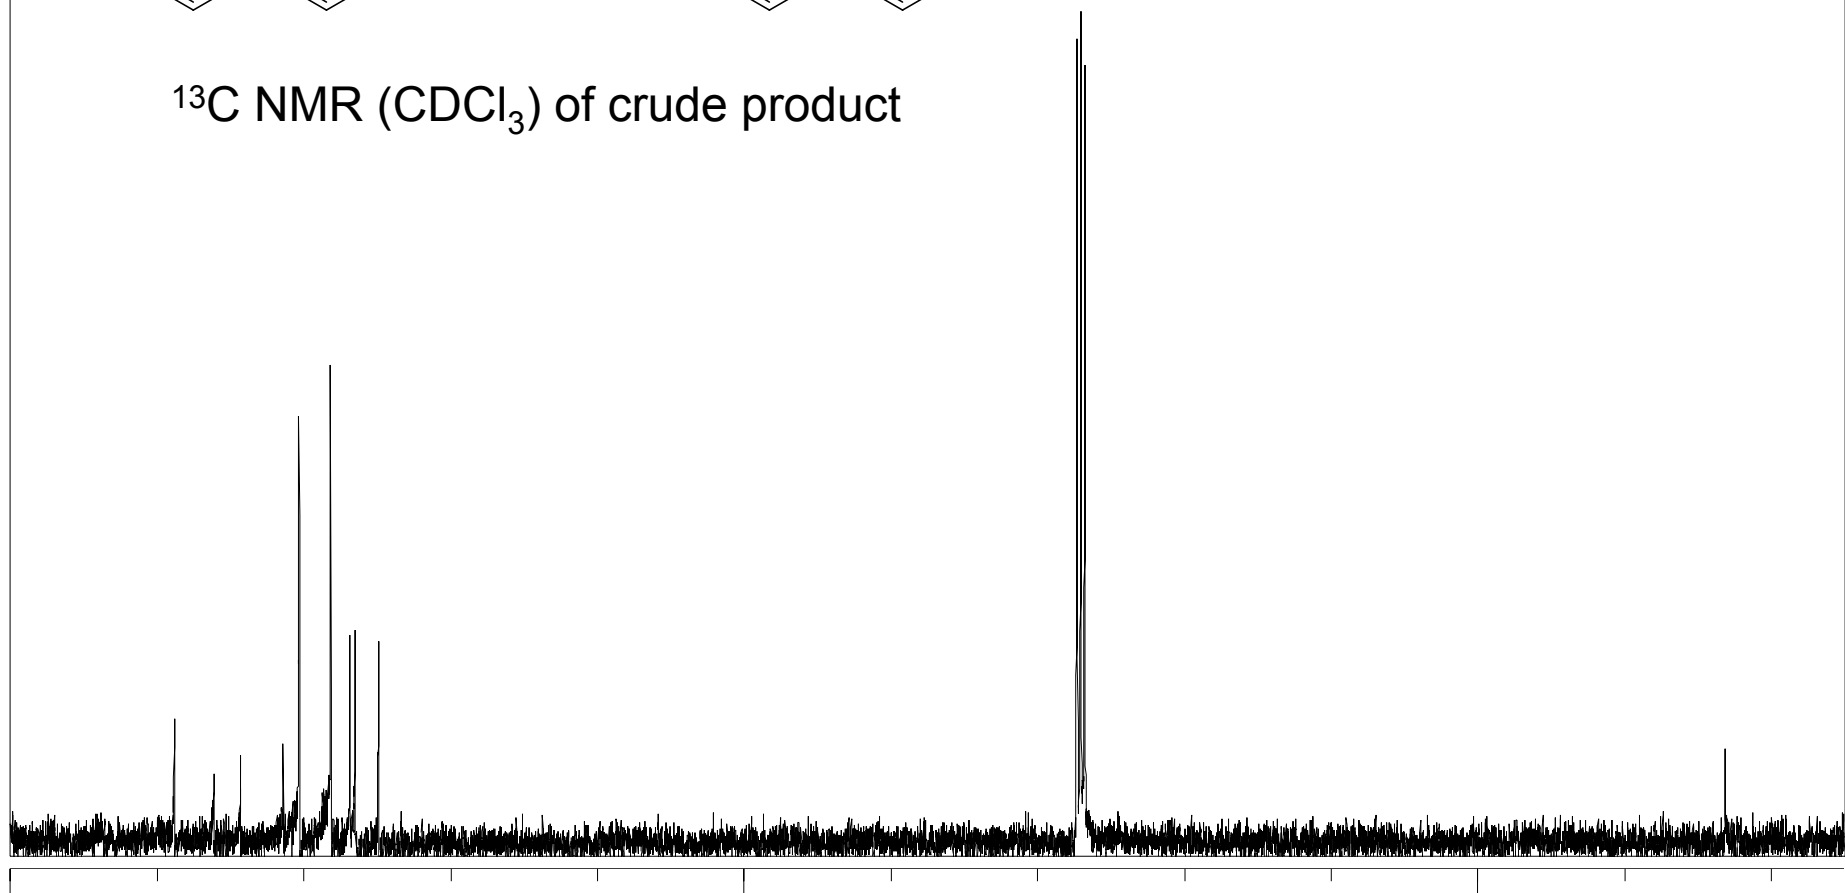

ppm (t1)

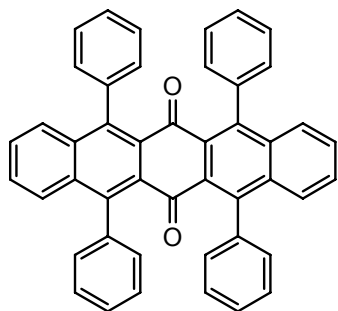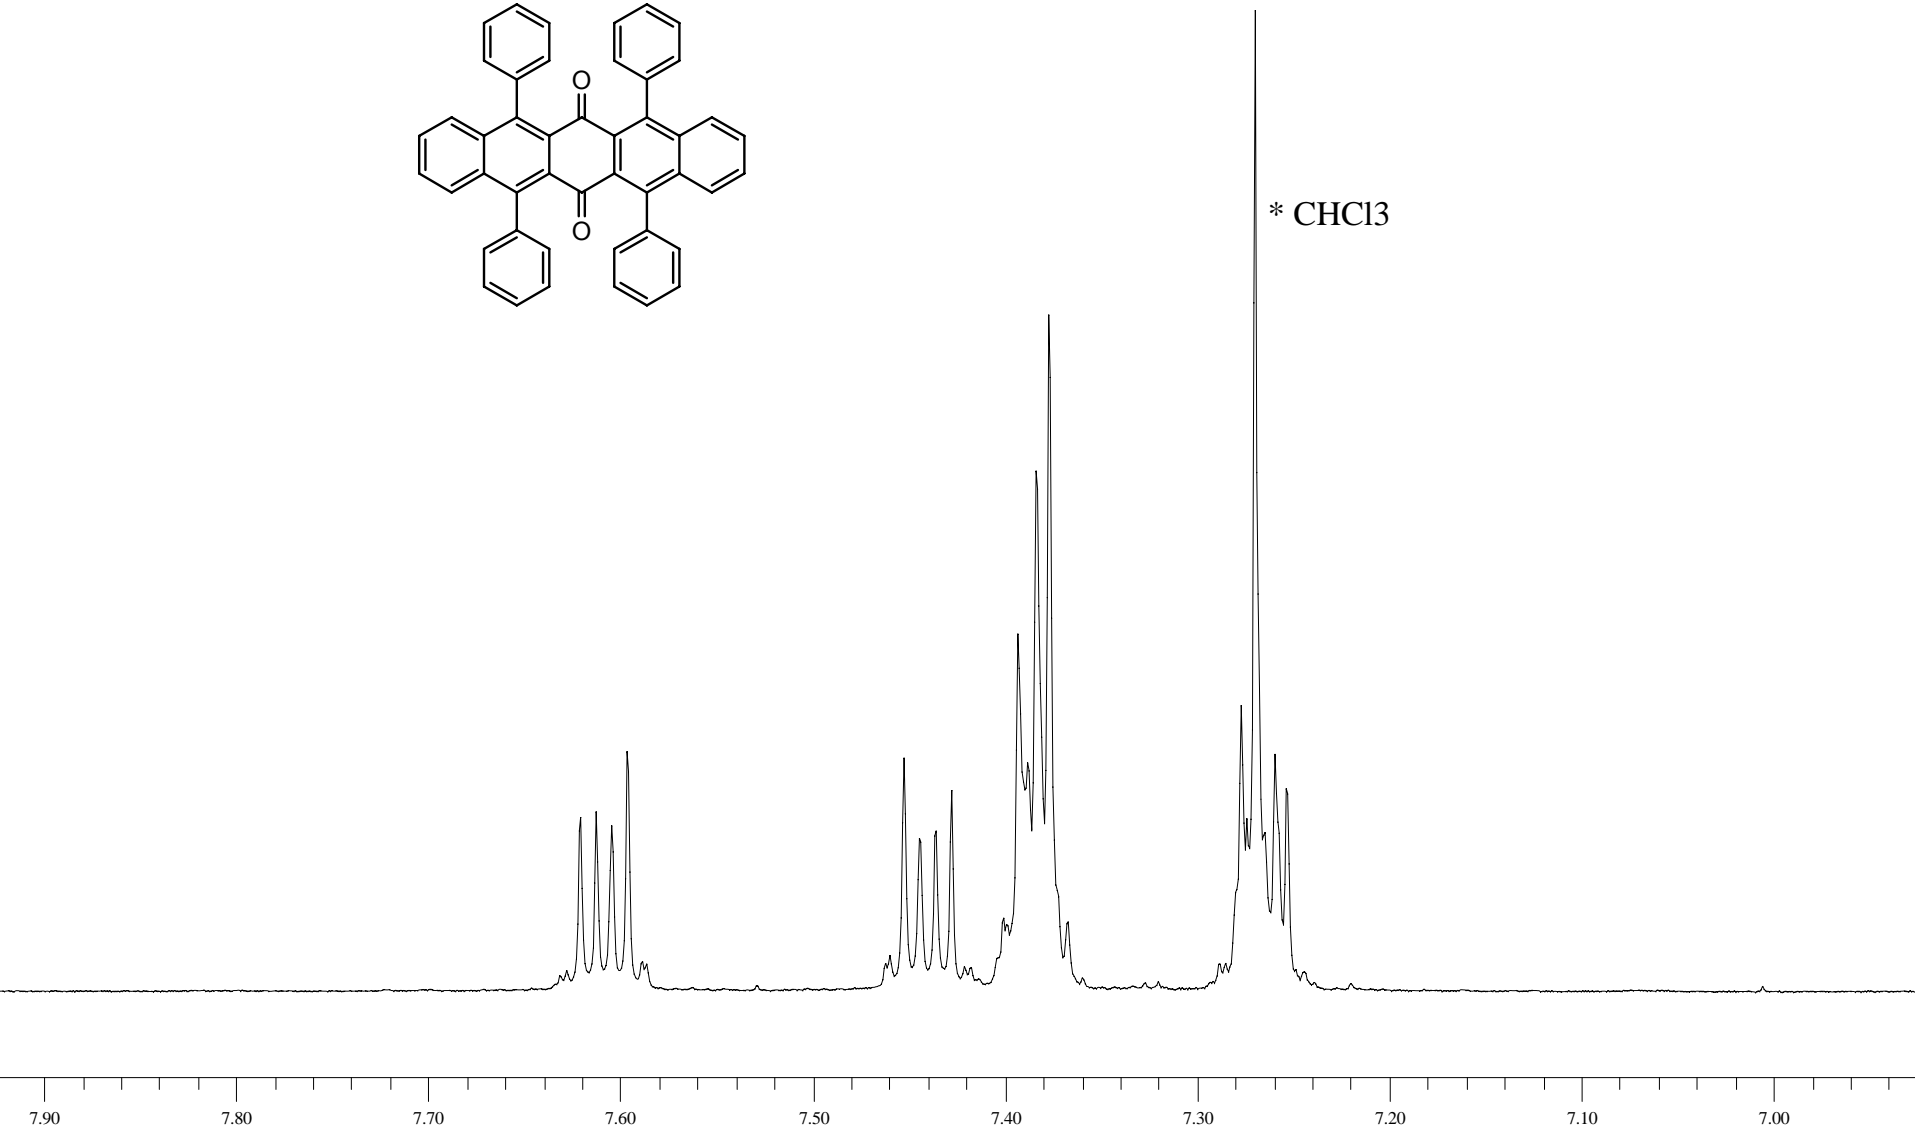

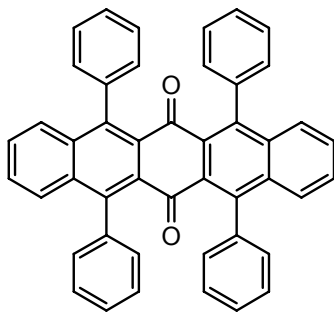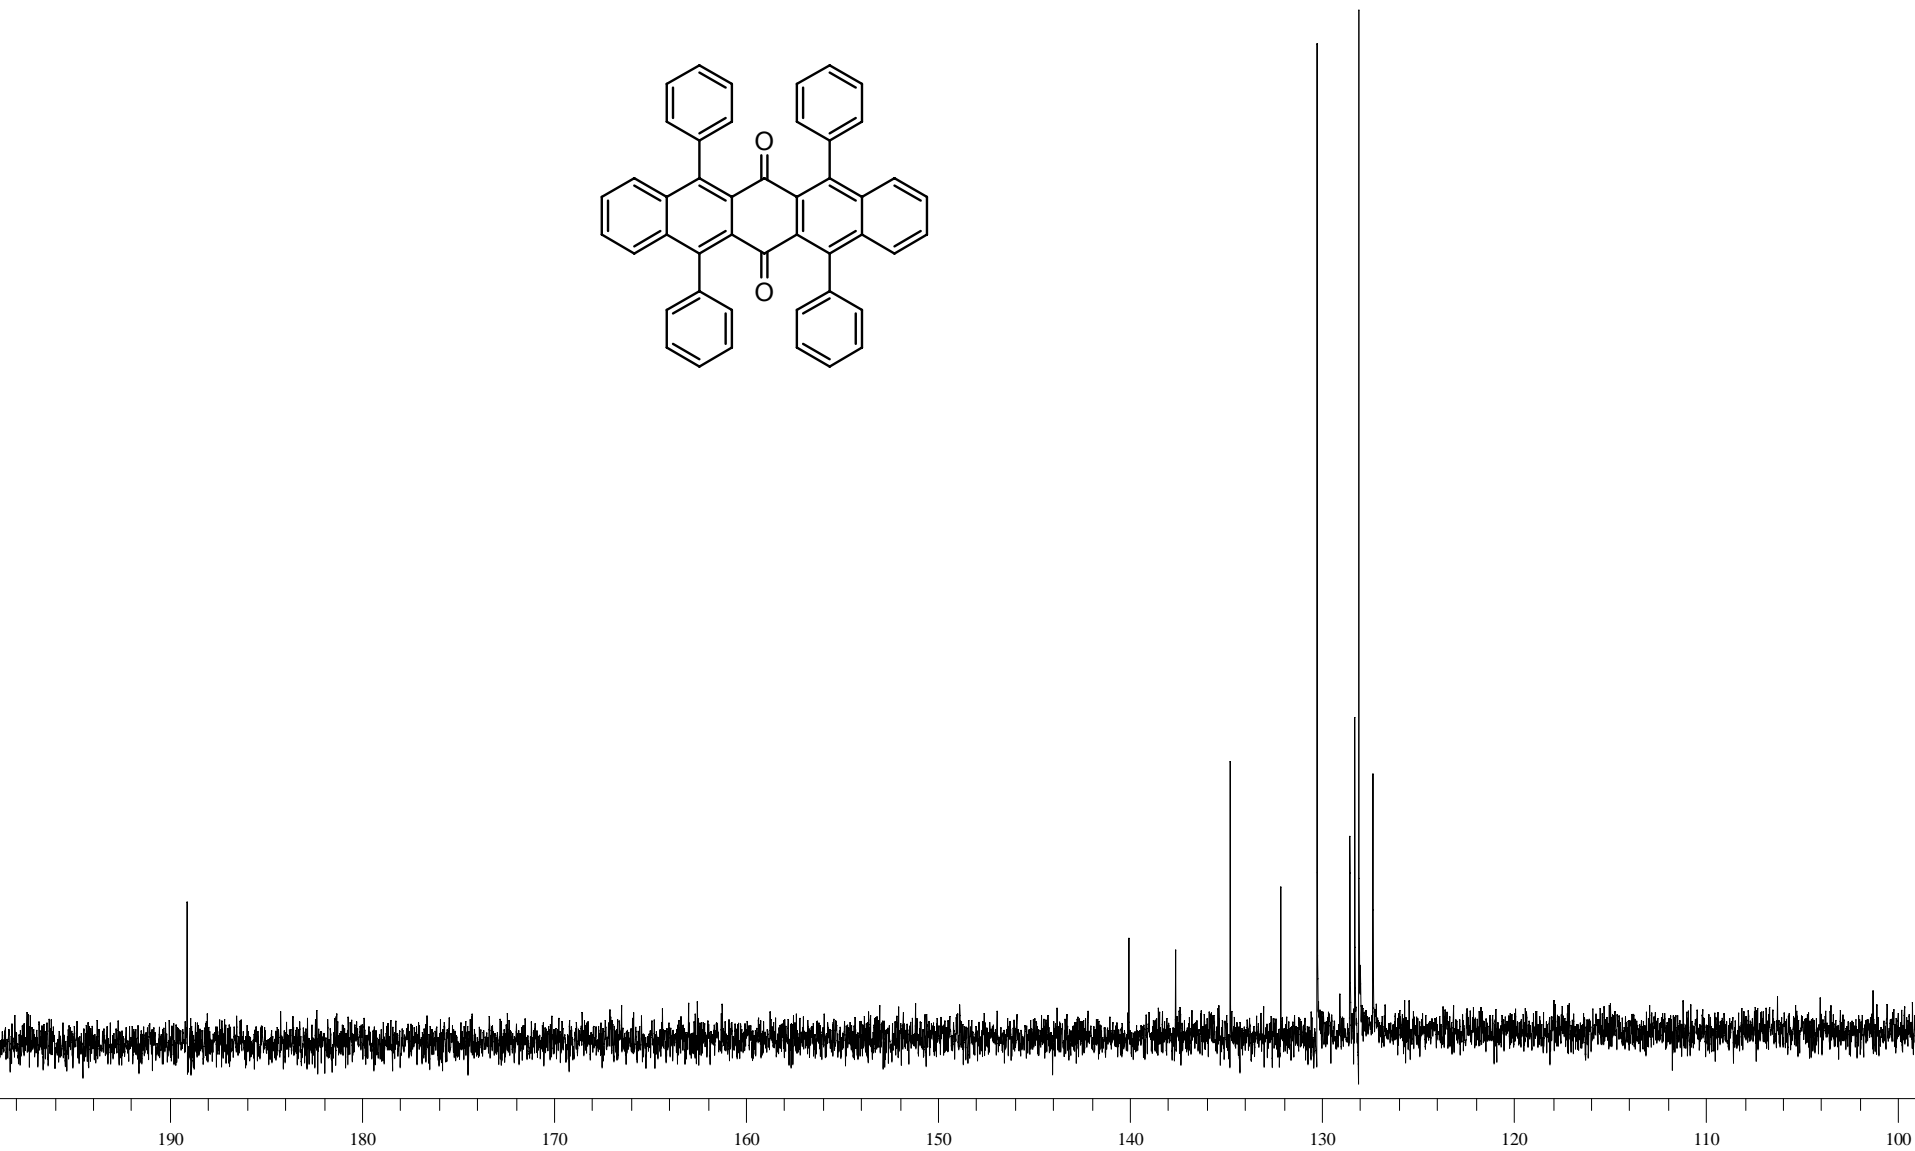

Data: TPDHP\_10001.A16 29 Jul 2005 10:25 Cal: David 28 Jun 2005 10:46  
Kratos PC Axima CFRplus V2.3.4: Mode reflectron\_1ghz, Power: 69, P.Ext. @ 2000 (bin 144)

117 mV[sum= 11678 mV] Profiles 1-100 Smooth Av 2 -Baseline 80

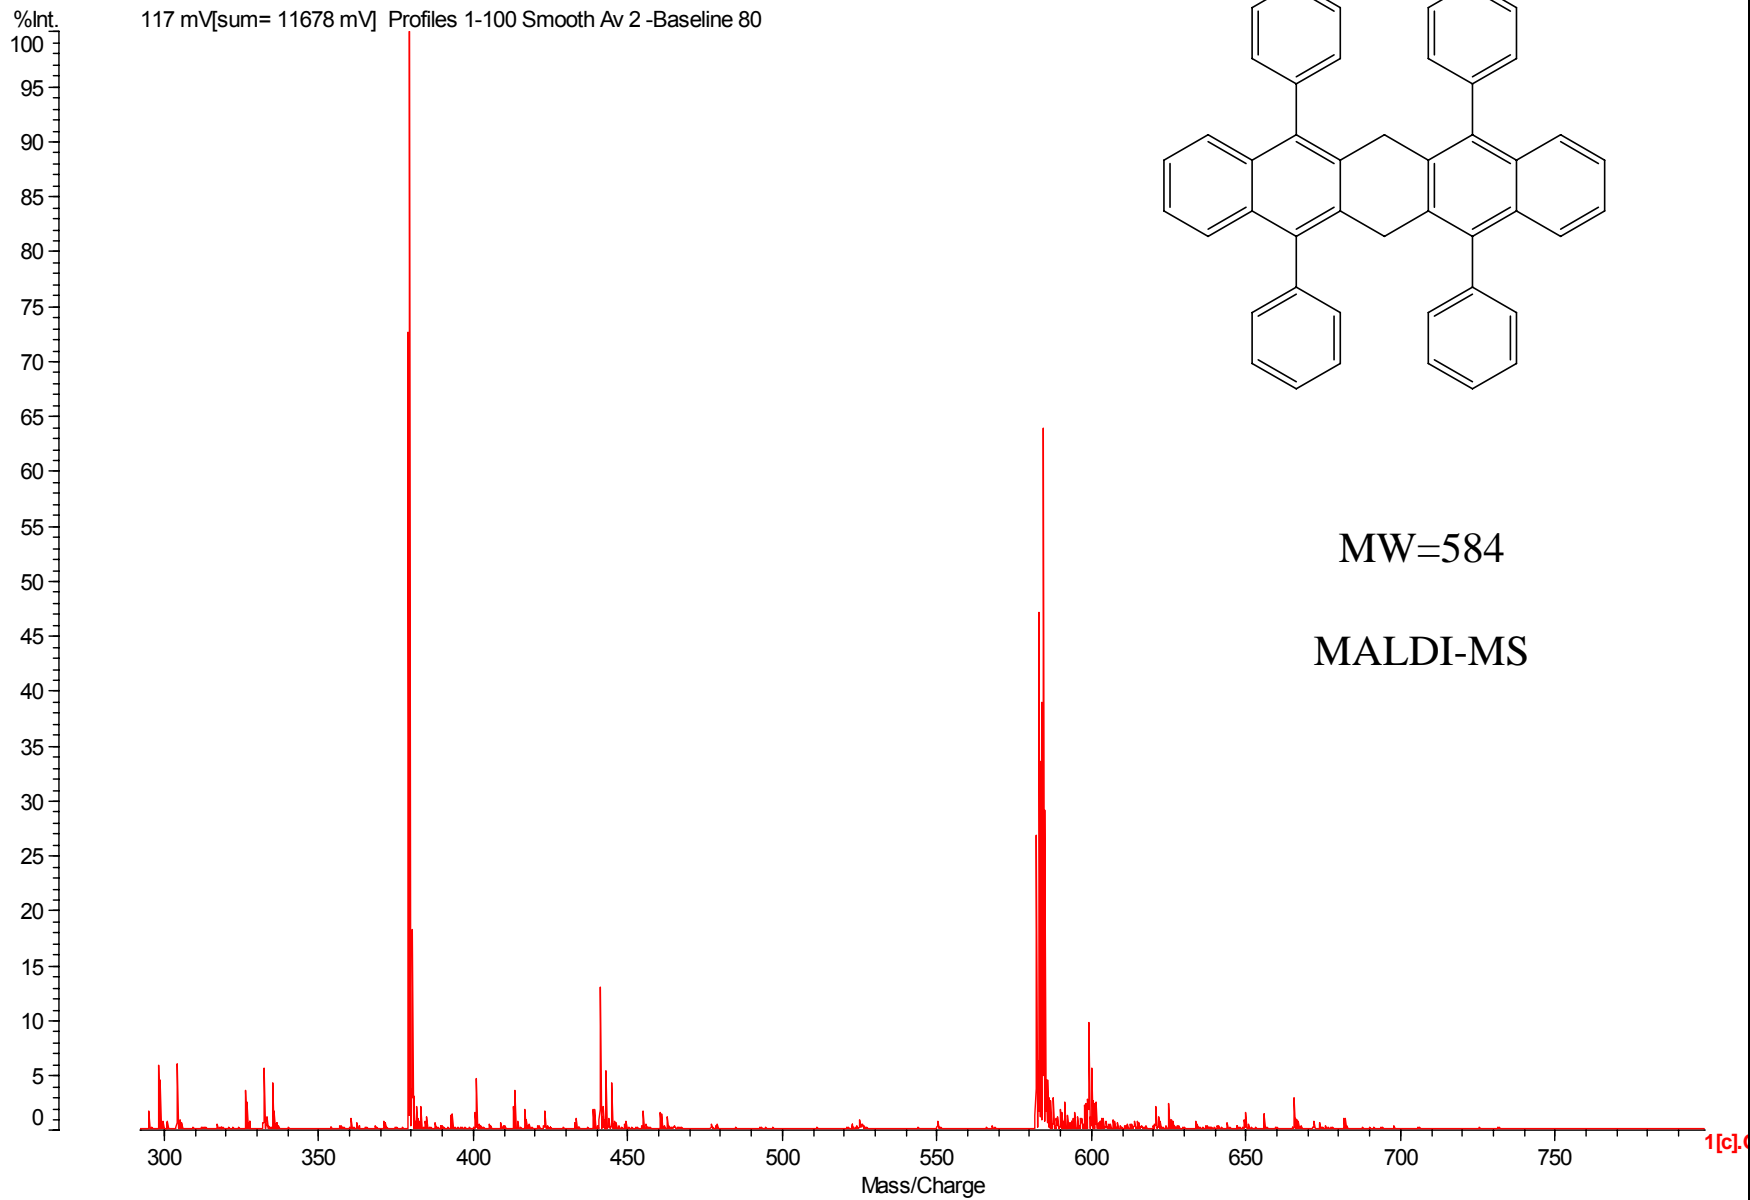



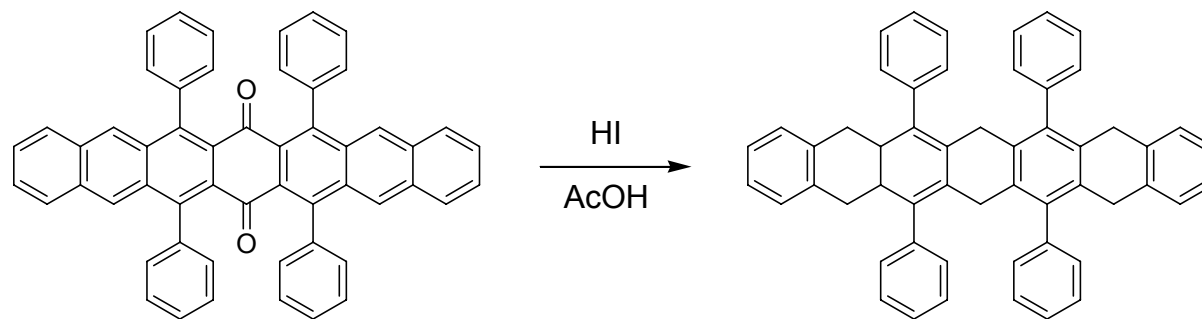

$^1\text{H}$  NMR ( $\text{CDCl}_3$ ) of crude product

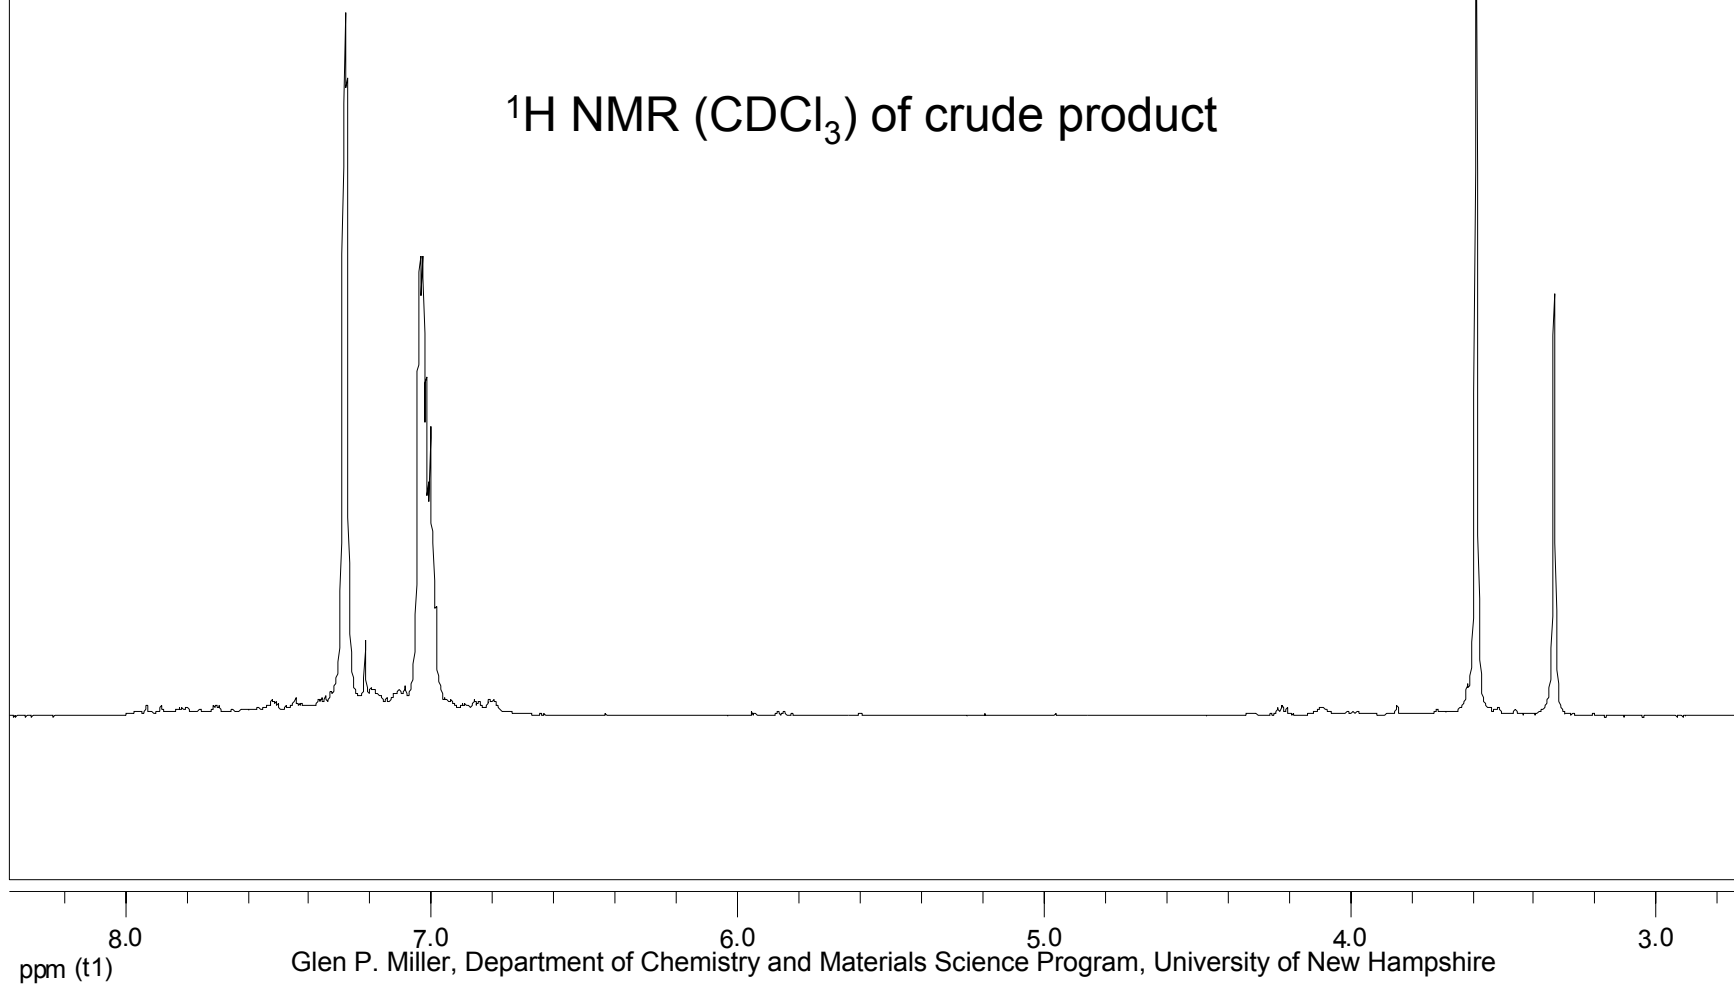

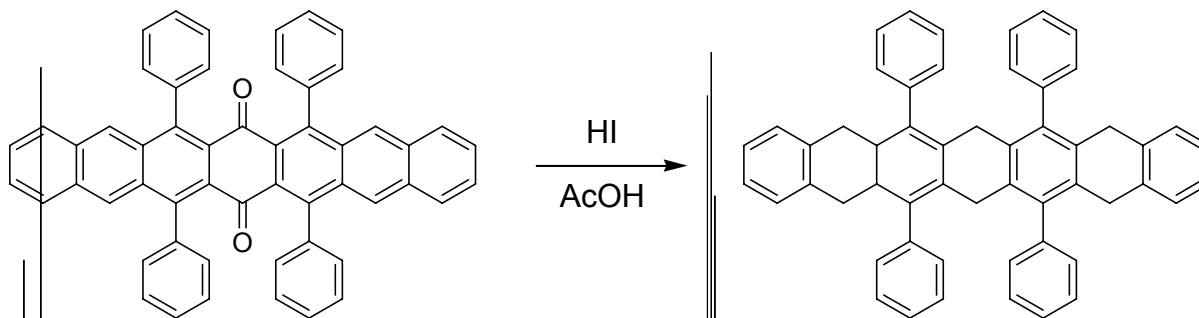

<sup>13</sup>C NMR (CDCl<sub>3</sub>) of crude product

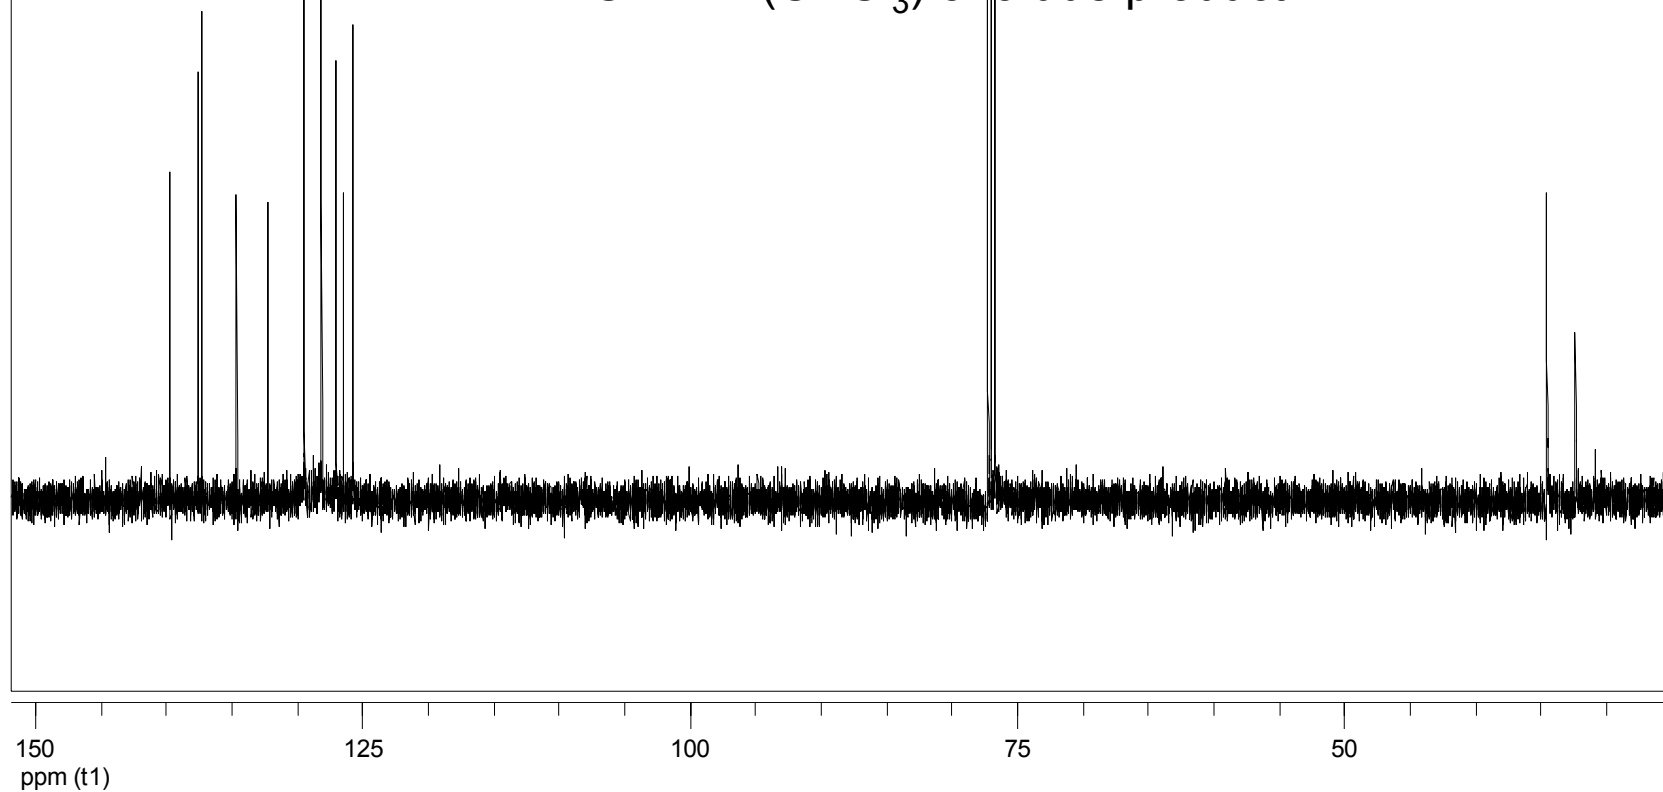

# MALDI MS

Data: jb101801\_Hexahydroheptacene0001.L23 2 Nov 2005 9:48 Cal: Briggs 26 Oct 2005 9:36  
Kratos PC Axima CFRplus V2.3.4: Mode reflectron, Power: 110, P.Ext. @688 (bin 90)

%Int. 39 mV[sum= 9026 mV] Profiles 1-234: Averaged

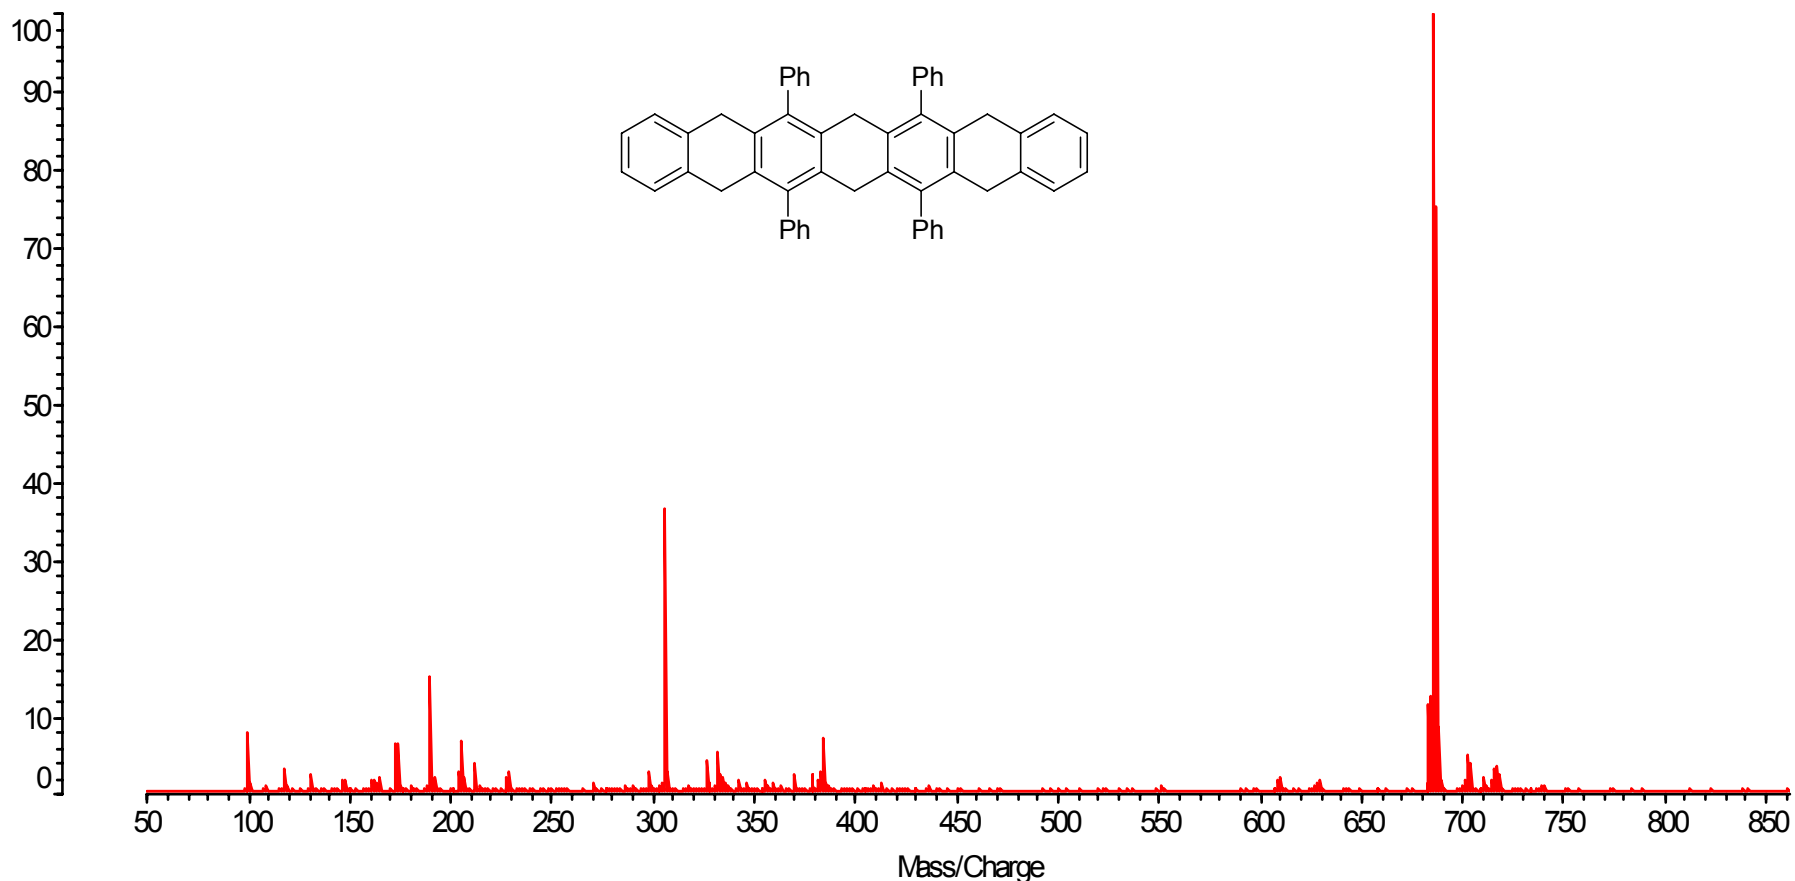

# MALDI MS

Data: jb101801\_Hexahydroheptacene0001.L23 2 Nov 2005 9:48 Cal: Briggs 26 Oct 2005 9:36  
Kratos PC Axima CFRplus V2.3.4: Mode reflectron, Power: 110, P.Ext. @688 (bin 90)

%Int. 39 mV[sum= 9026 mV] Profiles 1-234: Averaged

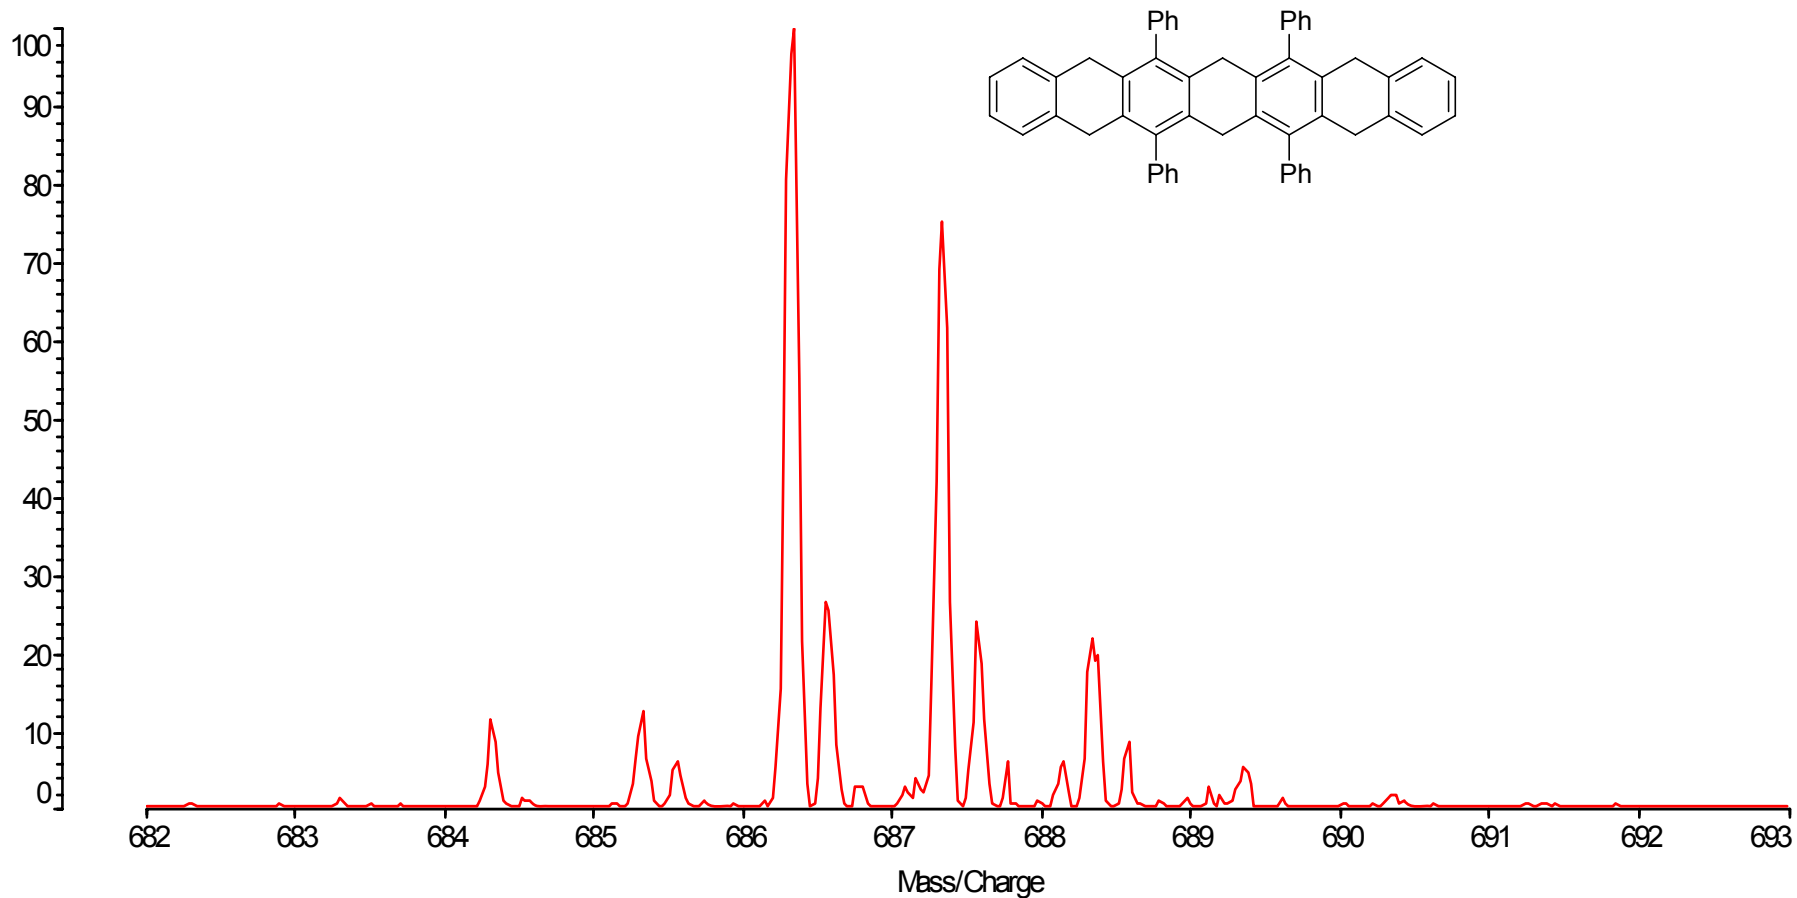

C60-PENTACENE MONOADDUCT

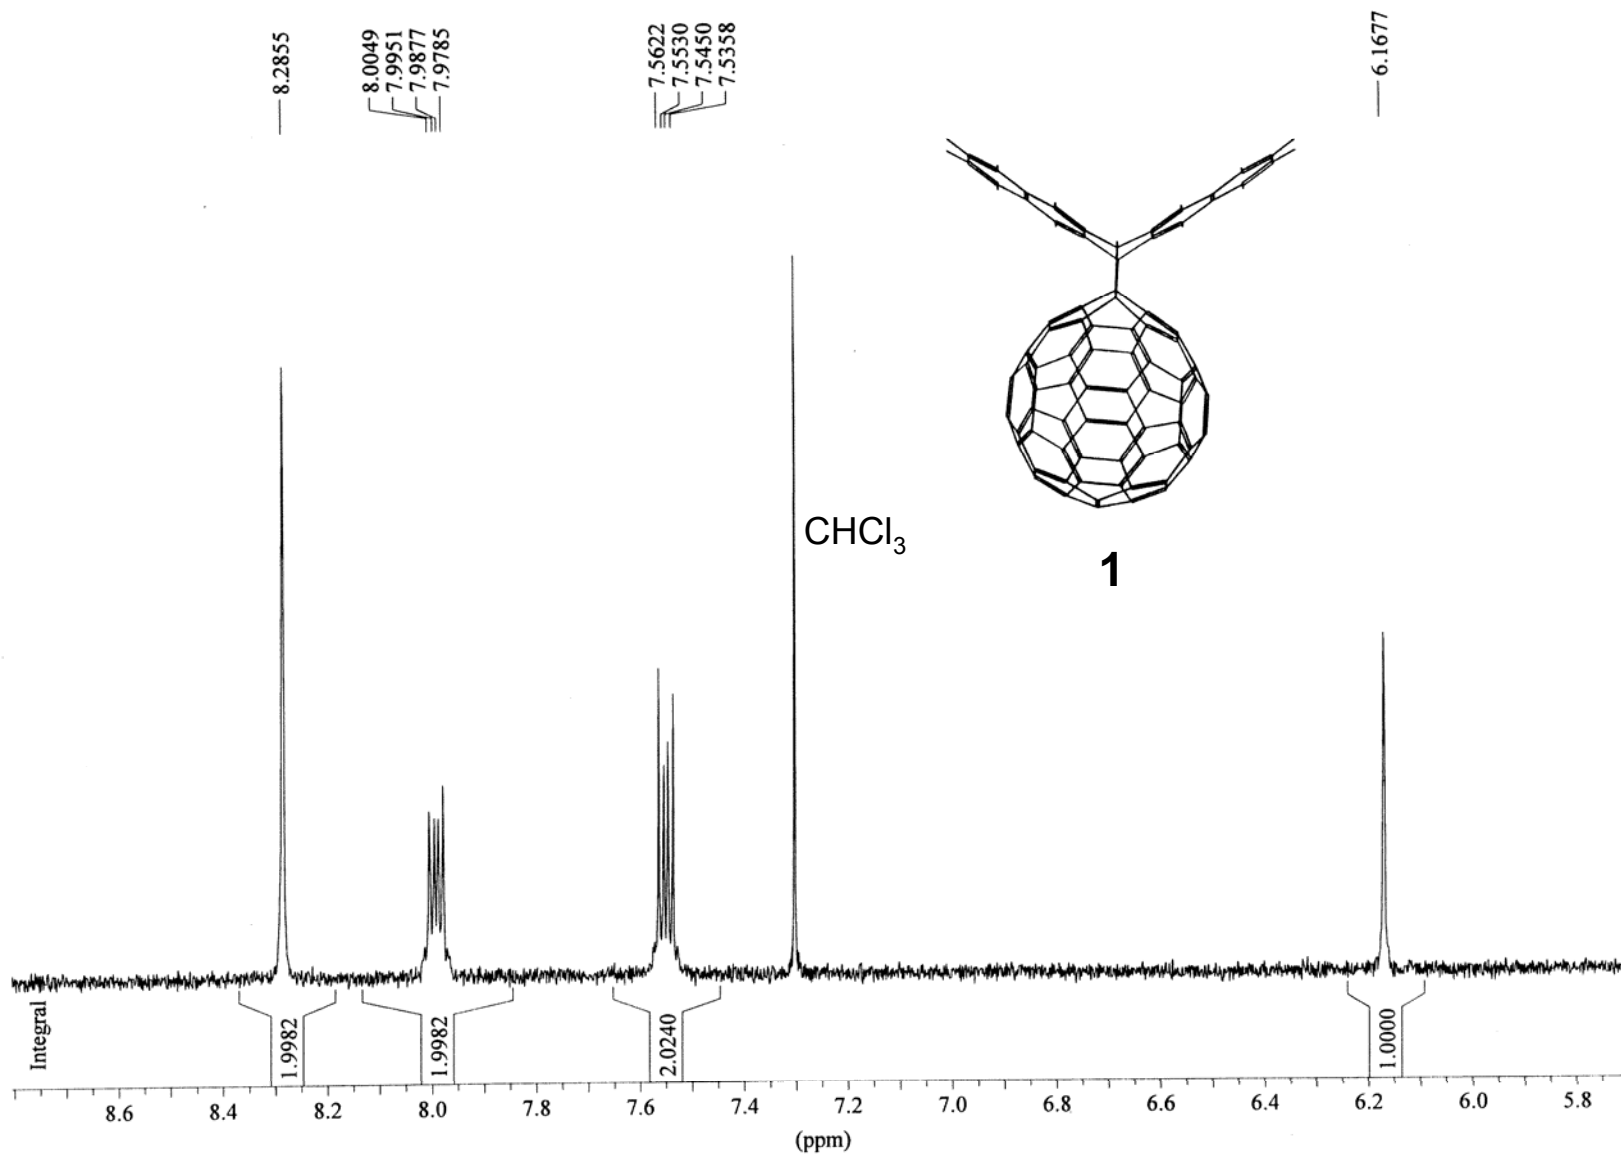

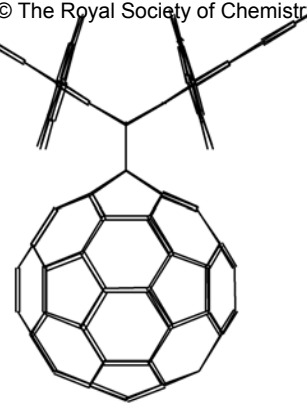

**2**

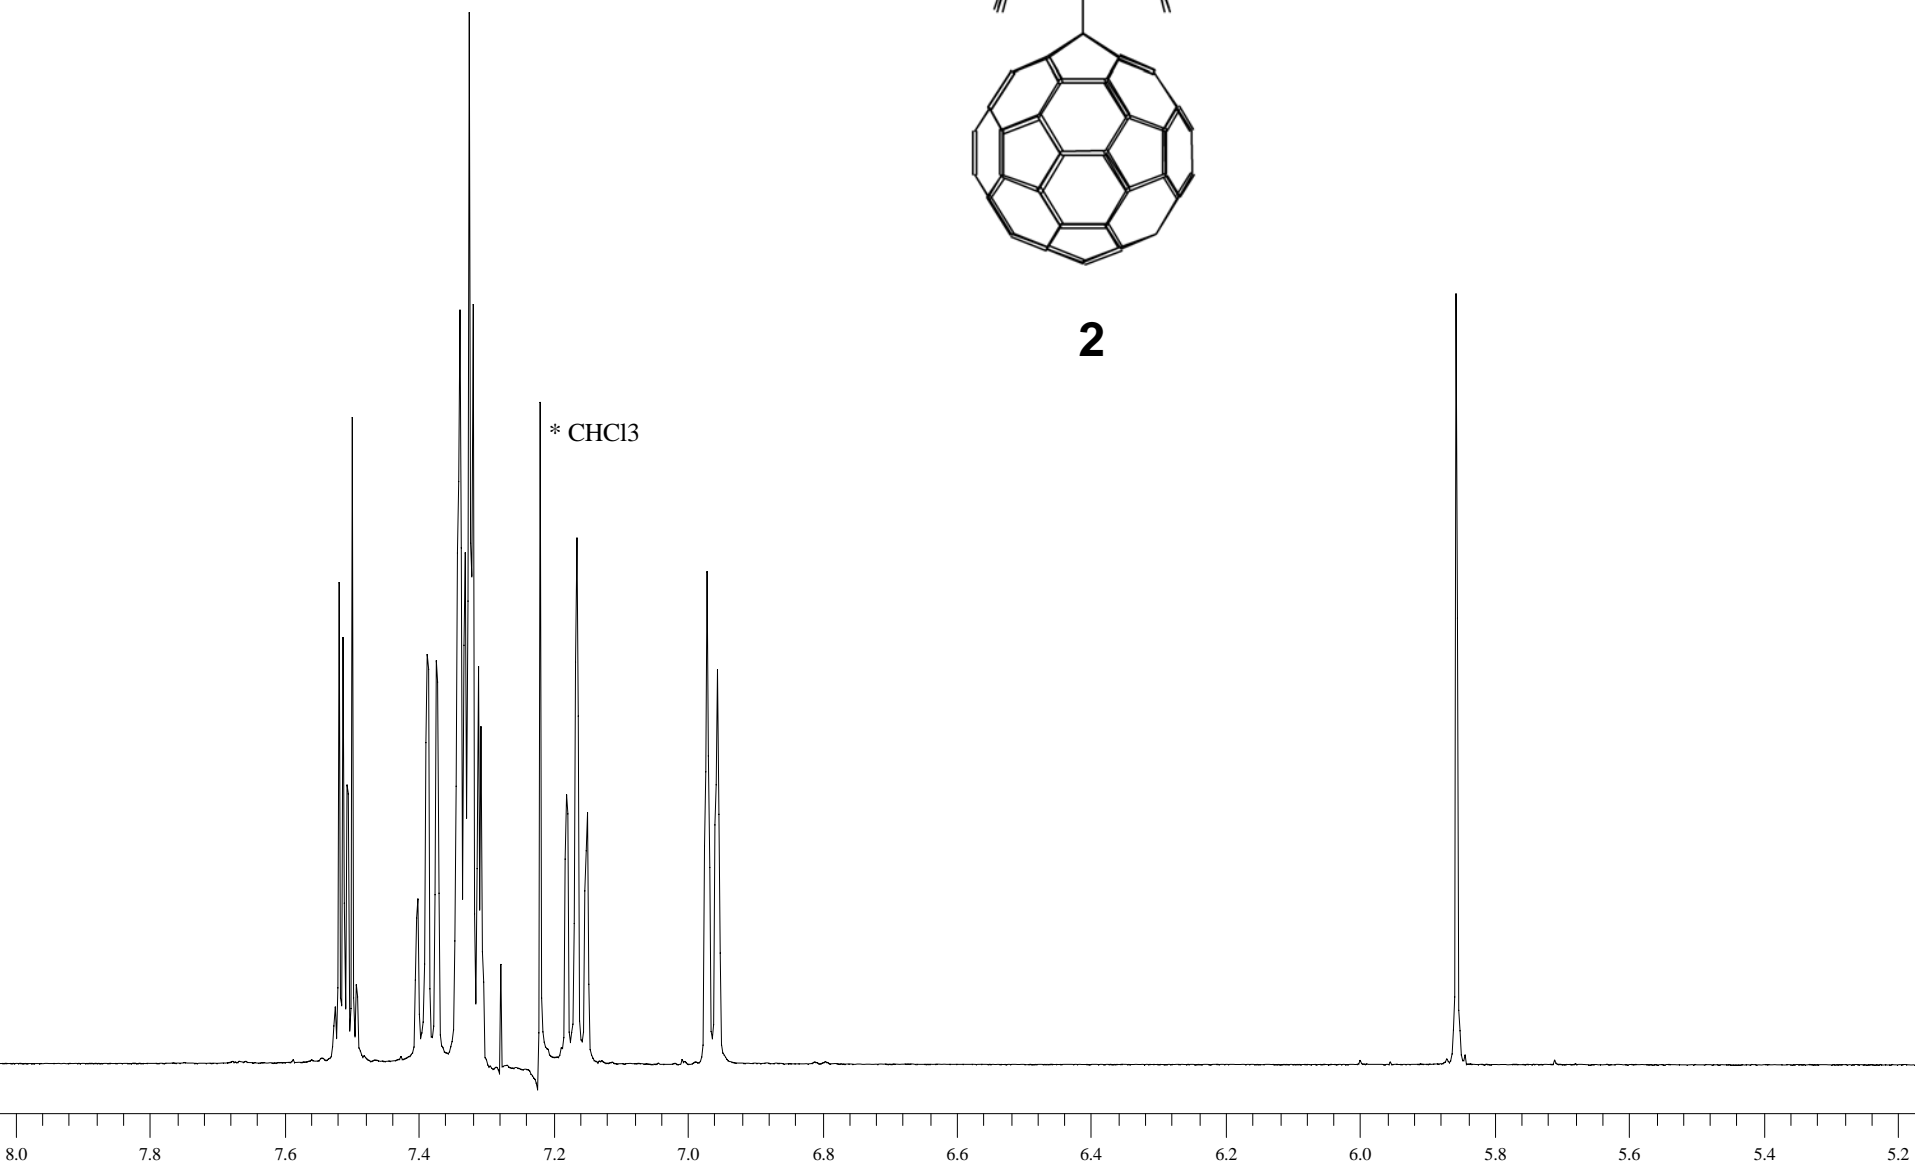

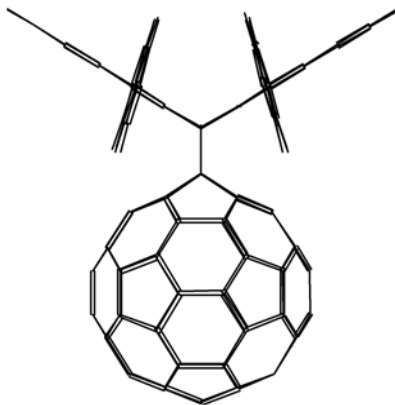

**2**

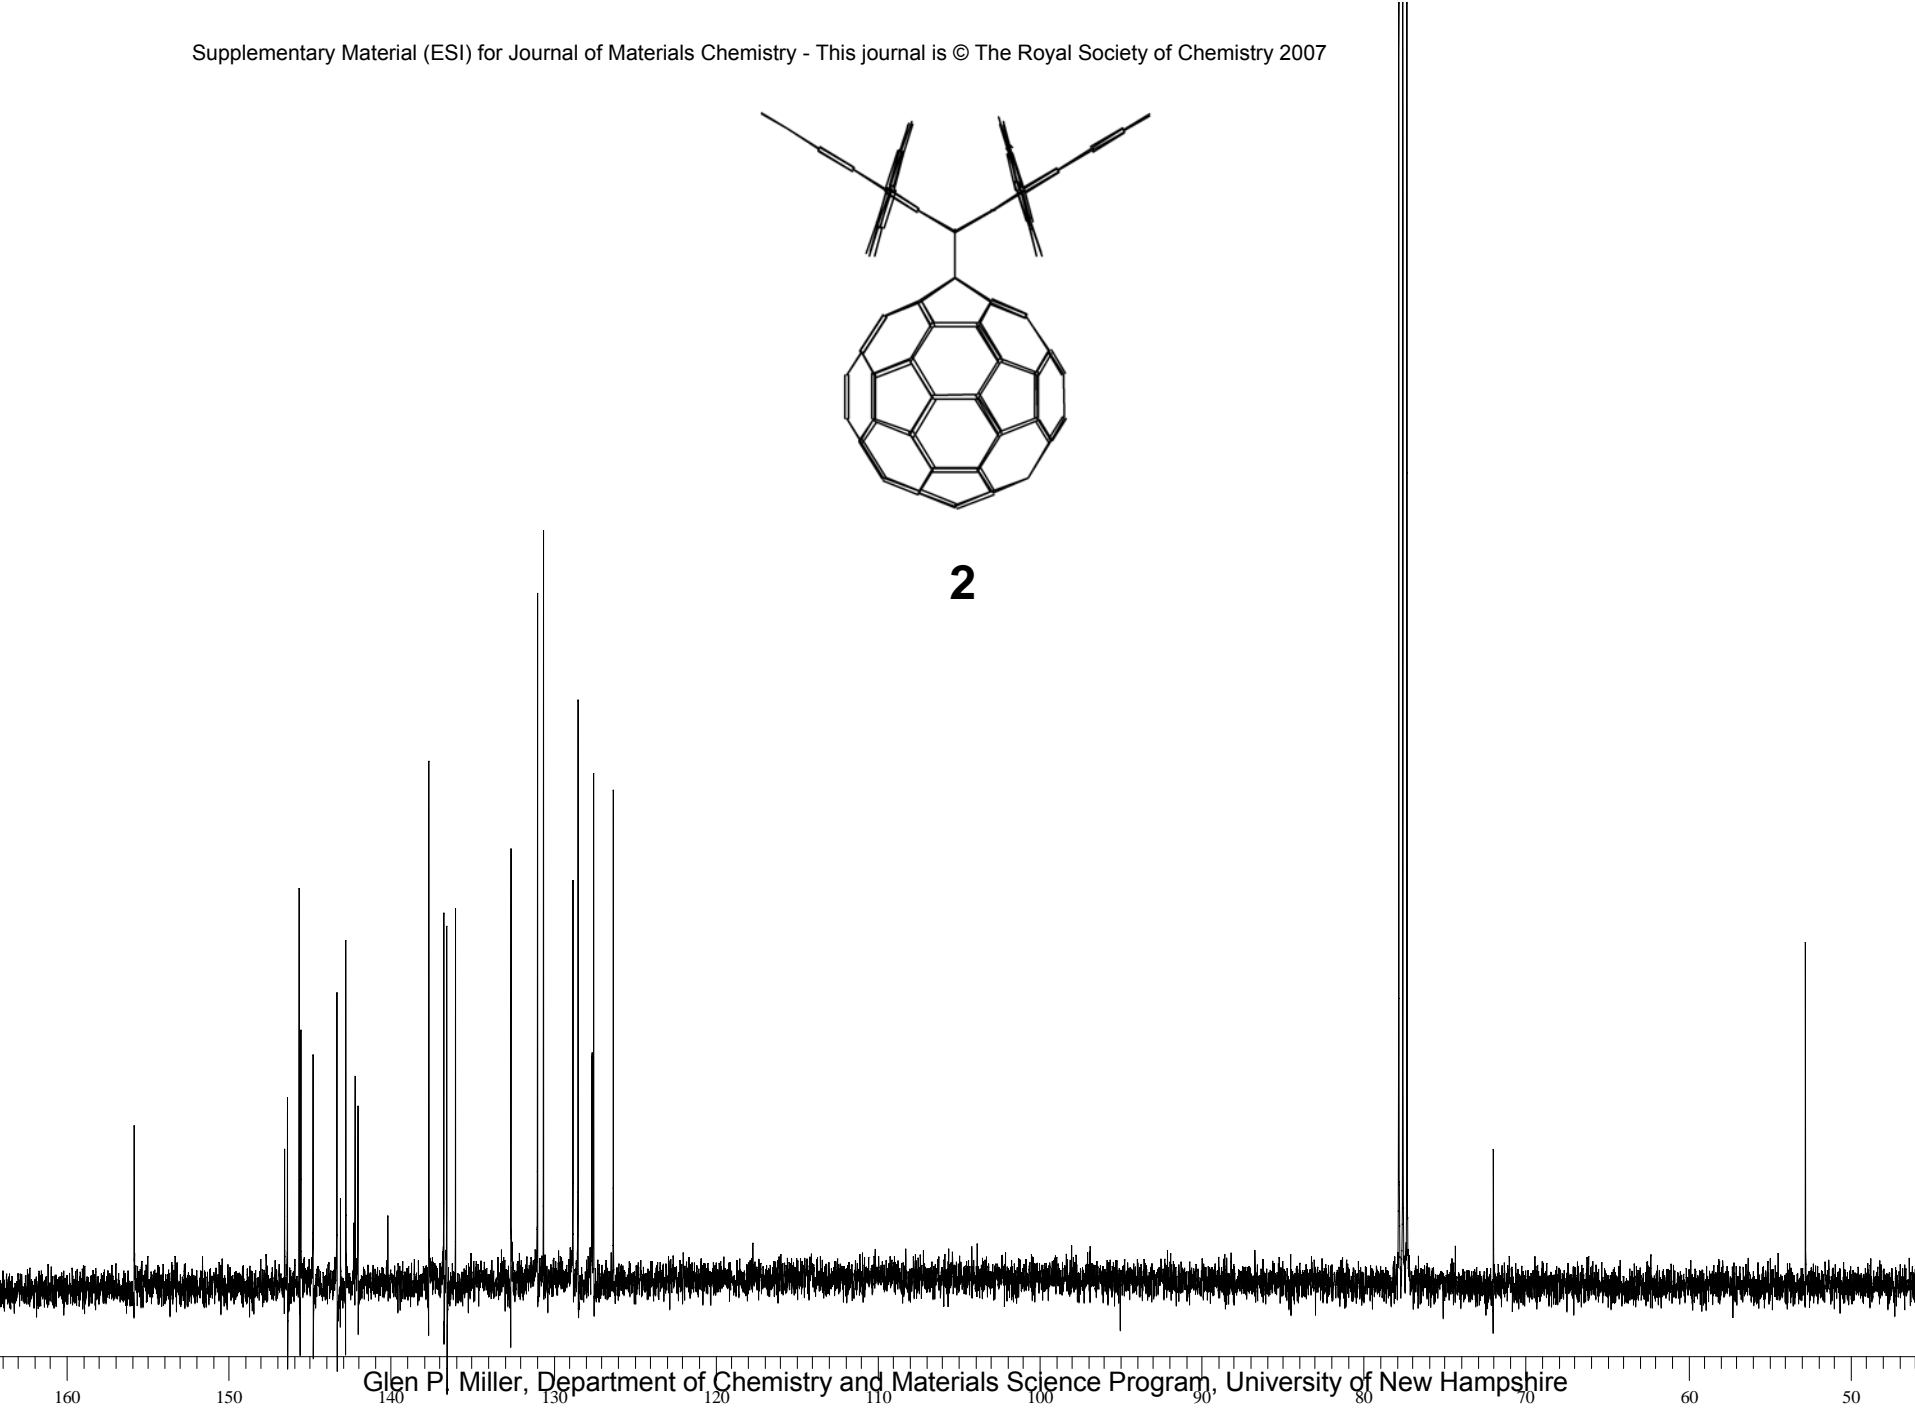

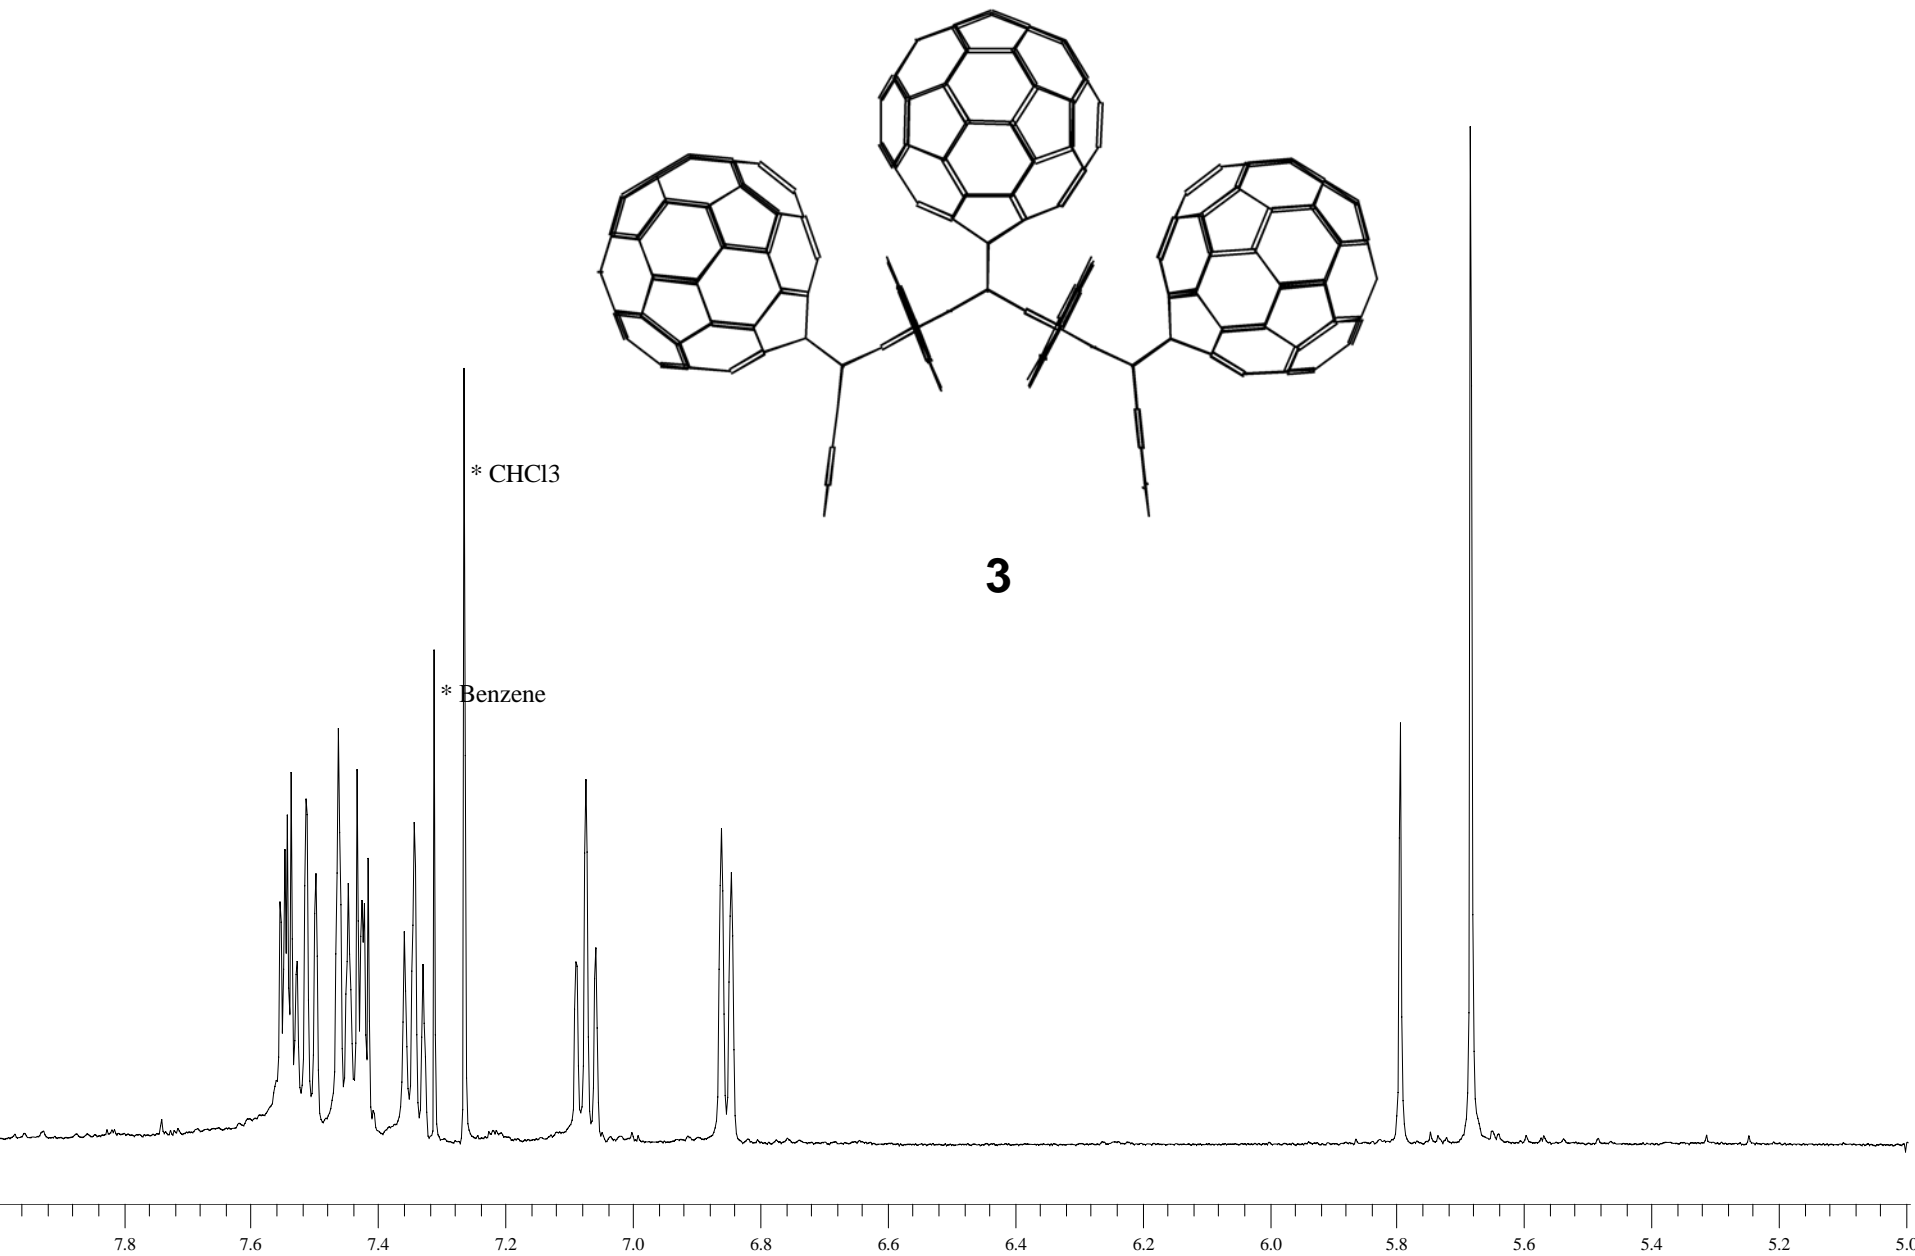



[60]Fullerene \*

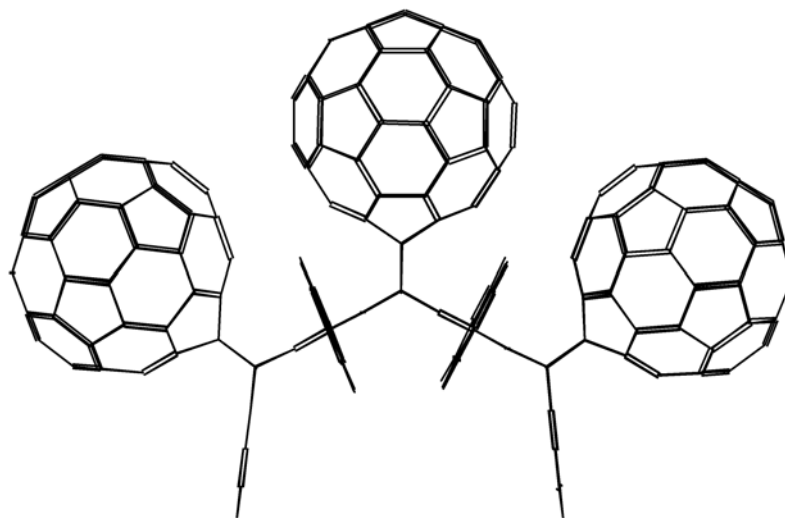

**3**

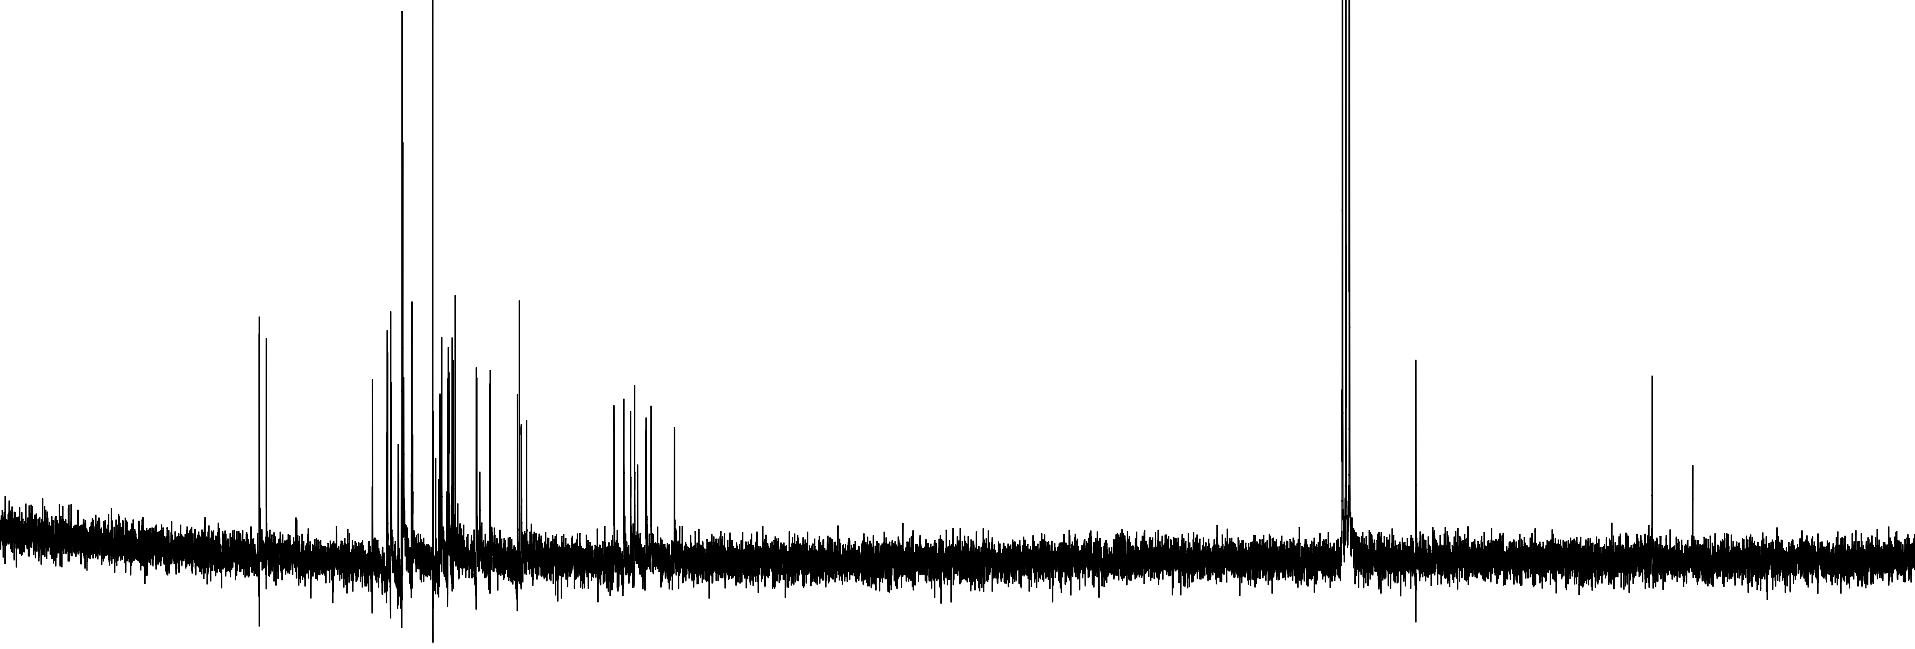

Data: trisadduct\_nomatrix0001.I21 26 Oct 2005 10:13 Cal: Briggs 26 Oct 2005 9:36  
Kratos PC Axima CFRplus V2.3.4: Mode reflectron, Power: 88, P.Ext. @2842 (bin 183)

%Int. 393 mV[sum= 196706 mV] Profiles 1-500: Averaged

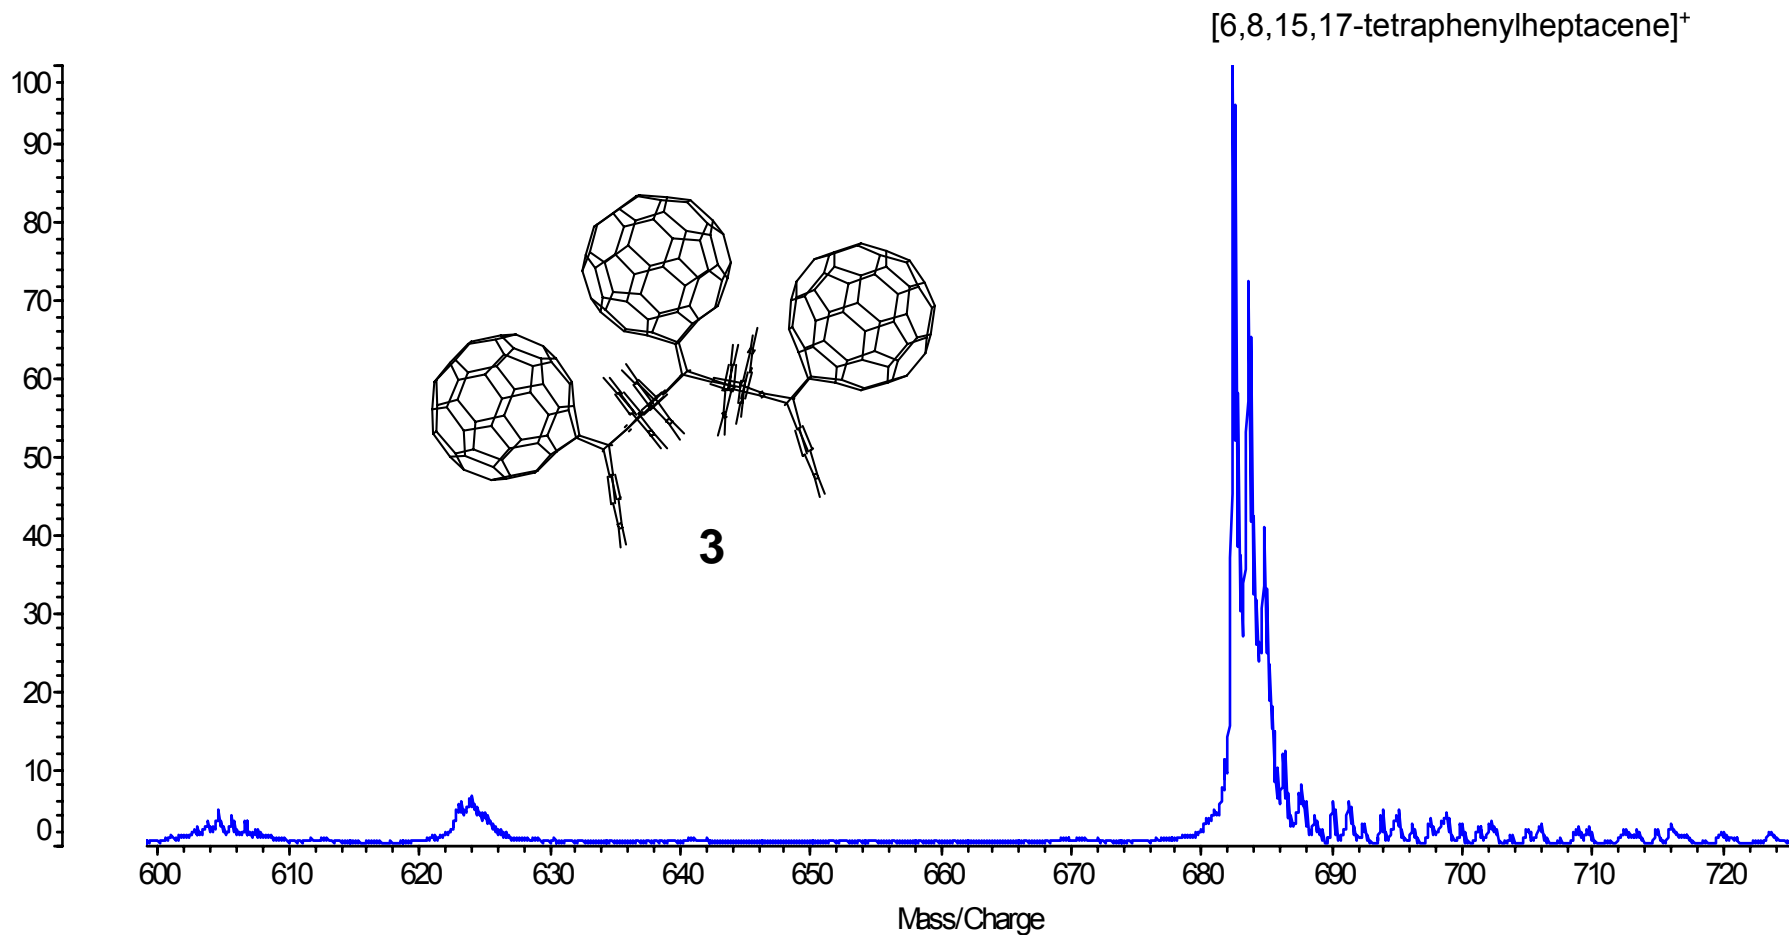

Supplement: b700956a.pdf [file b700956a.pdf]
